# Supplementary material for: Nutritional compensation of the circadian clock is a conserved process influenced by gene expression regulation and mRNA stability
Source: PLoS Biol. 2023 Jan 5;21(1):e3001961. doi: 10.1371/journal.pbio.3001961 (PMC9848017; doi:10.1371/journal.pbio.3001961)
Supplement: S2 Table — The first tab of the Table is filtered for gene knockouts that progressed to the tertiary genetic screen, and the second tab of the Table contains all novel genes screened for compensation defects. Circadian rhythmicity at the gene and protein level among knockouts screened was determined from previous studies [45,138]. Promoter binding by the WCC positive arm transcription factors was determined from previous studies [138–140]. Light-regulated gene activation or repression was determined from previous studies [139,141,142]. Gene expression Z-scores from carbon starvation conditions were also reported [55] (S4 Fig). (XLSX) [file pbio.3001961.s010.xlsx]

## Sheet: tertiary_screen_genes
Supplementary Table 2. Description of Neurospora genes screened for Nutritional Compensation defects
over-compensation mutant; under-compensation mutant
NCU_ID	Common_Name	Hurley_2014_Rhythmic_mRNA?	Hurley_2018_Rhythmic_mRNA?	Hurley_2018_Proteomics	Hurley_2018_Rhythmic_Protein?	WC-2_ChIP_Target?	Light_Regulated_Gene_Expression?	Wang_2017_2%vs0%glucose_Z-score
NCU00188	apg-1	No	No	Detected	No	NA	Wu_2014suppS6	-0.926974
NCU00269	set-2	Yes	Yes	Detected	No	NA	NA	0.583475
NCU00768	mRNA binding	No	No	Detected	No	NA	Wu_2014suppS6	1.95959
NCU01019	prd-2	No	No	Detected	Yes	NA	NA	0.528489
NCU01143	msp-8	No	No	Detected	No	NA	NA	0.752814
NCU01206	set-1	No	No	Not_Detected	Not_Detected	NA	NA	1.066
NCU01498	ime-2	No	Yes	Not_Detected	Not_Detected	Hurley_2014	NA	0.165103
NCU01747	gde-1	Yes	Yes	Detected	No	NA	NA	-1.31786
NCU01793	mrs-7	No	Yes	Detected	No	NA	NA	0.59371
NCU01823	NA	No	No	Detected	No	Hurley_2014	NA	0.58079
NCU01940	ptk-2	No	Yes	Detected	No	NA	NA	1.0316
NCU02152	cpsf6	No	No	Detected	Yes	NA	NA	0.531899
NCU02265	frq	No	Yes	Not_Detected	Not_Detected	Smith_2010main_supp_AND_Hurley_2014_AND_Sancar_2015	Chen_2009supp_Wu_2014suppS9_S6_Sancar_2015supp	0.0391314
NCU02393	mak-2	No	No	Detected	No	NA	Wu_2014suppS6	-0.674387
NCU02713	csp-1	Yes	Yes	Not_Detected	Not_Detected	Smith_2010main_supp_AND_Hurley_2014_AND_Sancar_2015	Chen_2009supp_Wu_2014suppS9_S6_Sancar_2015supp	0.202074
NCU02736	hypothetical	No	No	Detected	No	NA	NA	0.0502987
NCU02814	prd-4 // chk2	No	Yes	Detected	No	NA	Wu_2014suppS6	-0.119247
NCU02961	rbg-28	No	No	Not_Detected	Not_Detected	NA	NA	0.4881
NCU03124	prd-3 // cka	No	Yes	Detected	No	NA	NA	-0.337656
NCU03226	y14	No	No	Detected	No	NA	NA	-0.00968914
NCU03435	upf3	No	No	Detected	No	NA	NA	0.0765019
NCU03616	ras-2	No	Yes	Detected	Yes	NA	NA	0.869491
NCU03894	stk-4	No	No	Detected	No	NA	NA	0.585761
NCU03946	pabp-2	Yes	Yes	Detected	No	NA	NA	0.277427
NCU04164	hypothetical	Yes	No	Detected	No	NA	NA	2.04227
NCU04242	upf1 // prd-6	No	No	Detected	No	NA	NA	0.377508
NCU04254	hypothetical	No	No	Detected	No	NA	NA	-0.120844
NCU04566	prk-10	No	No	Detected	No	NA	NA	-1.18871
NCU05267	upf2	No	No	Detected	No	Smith_2010supp	NA	0.510446
NCU06205	rco-1	No	No	Detected	Yes	NA	NA	0.385677
NCU06240	pkac-1	No	Yes	Detected	No	NA	NA	0.599494
NCU06419	mek-1	No	Yes	Detected	Yes	NA	NA	-1.10387
NCU06565	Septal Pore	No	No	Not_Detected	Not_Detected	NA	NA	-0.452535
NCU06842	rcm-1	No	No	Detected	Yes	Sancar_2015	NA	1.05712
NCU07032	hypothetical	Yes	Yes	Not_Detected	Not_Detected	NA	NA	-0.424311
NCU07839	prd-1	Yes	Yes	Detected	No	NA	Wu_2014suppS6	2.91302
NCU07874	pub1	No	Yes	Detected	No	NA	NA	-0.374449
NCU08807	cre-1	Yes	Yes	Detected	Yes	Smith_2010main_supp_AND_Hurley_2014_AND_Sancar_2015	Wu_2014suppS6	1.65794
NCU09014	cpsf5	No	No	Detected	No	NA	NA	0.49695
NCU09048	hypothetical	No	No	Detected	No	NA	Wu_2014suppS6	0.561042
NCU09076	hel-4	No	Yes	Detected	Yes	NA	Wu_2014suppS6	0.857027
NCU09123	camk-1	No	Yes	Detected	No	NA	Wu_2014suppS6	-0.495462
NCU09539	mrp-13	No	No	Detected	No	NA	NA	0.0749265
NCU09973	hypothetical	No	No	Not_Detected	Not_Detected	NA	NA	-0.847227
NCU10352	snr-6	No	No	Detected	No	NA	NA	-0.306255
NCU11426	nuc-2	No	Yes	Detected	Yes	Hurley_2014	Chen_2009supp_Sancar_2015supp	-0.862566
NCU16397	nab2	No	No	Detected	No	Sancar_2015	NA	0.414606
NCU17030	hrp1	No	No	Detected	No	NA	NA	-0.0568816

## Sheet: all_screen_genes
Supplementary Table 2. Description of Neurospora genes screened for Nutritional Compensation defects
over-compensation mutant; under-compensation mutant
NCU_ID	Common_Name	Hurley_2014_Rhythmic_mRNA?	Hurley_2018_Rhythmic_mRNA?	Hurley_2018_Proteomics	Hurley_2018_Rhythmic_Protein?	WC-2_ChIP_Target?	Light_Regulated_Gene_Expression?	Wang_2017_2%vs0%glucose_Z-score
NCU00065	tdus-2	No	Yes	Detected	No	NA	NA	1.01333
NCU00066	msp-1 // cwc-22	No	Yes	Detected	Yes	NA	NA	0.49694
NCU00076	qip	No	No	Not_Detected	Not_Detected	NA	NA	-0.952546
NCU00105	rbg-58	No	Yes	Detected	No	Sancar_2015	NA	2.77095
NCU00108	stk-13	No	No	Not_Detected	Not_Detected	NA	NA	-0.217886
NCU00118	hypothetical	No	No	Not_Detected	Not_Detected	NA	NA	-0.0415421
NCU00158	trm-63	No	Yes	Detected	No	NA	NA	0.643142
NCU00181	ppi-2	No	No	Detected	No	NA	NA	0.438422
NCU00188	apg-1	No	No	Detected	No	NA	Wu_2014suppS6	-0.926974
NCU00210	cbp20	No	No	Detected	Yes	Smith_2010supp	NA	0.690506
NCU00230	prk-4	No	No	Not_Detected	Not_Detected	NA	NA	-0.0144812
NCU00269	set-2	Yes	Yes	Detected	No	NA	NA	0.583475
NCU00274	mus-21	No	No	Not_Detected	Not_Detected	NA	NA	0.57697
NCU00294	crp-74	No	Yes	Detected	No	NA	Wu_2014suppS6	1.09243
NCU00311	vts1	No	Yes	Detected	No	NA	NA	0.173665
NCU00340	pp-1 // steA	No	No	Detected	No	Hurley_2014	NA	0.597459
NCU00388	Septal Pore	No	No	Detected	No	NA	NA	0.262268
NCU00406	vel	No	Yes	Detected	No	Smith_2010supp	Wu_2014suppS9_S6	0.13949
NCU00413	crp-36	Yes	Yes	Detected	Yes	NA	NA	1.31824
NCU00415	hypothetical	No	No	Detected	No	NA	NA	1.30437
NCU00457	eif4B	No	No	Detected	No	NA	Wu_2014suppS9_S6	3.05271
NCU00475	crp-24	No	Yes	Detected	Yes	NA	Wu_2014suppS6	1.04777
NCU00483	hypothetical	No	Yes	Detected	No	NA	Wu_2014suppS6	1.63799
NCU00489	crp-10	No	Yes	Detected	No	NA	Wu_2014suppS6	1.32673
NCU00496	hypothetical	No	Yes	Not_Detected	Not_Detected	NA	NA	-0.659184
NCU00505	snr-12	No	No	Detected	Yes	NA	NA	1.01218
NCU00556	whi3	No	Yes	Detected	Yes	NA	NA	0.971975
NCU00578	ppi-1	No	No	Detected	No	NA	Wu_2014suppS6	-0.0993227
NCU00611	hypothetical	No	Yes	Detected	No	NA	NA	-0.720668
NCU00618	crp-6	Yes	Yes	Detected	No	NA	NA	0.832728
NCU00662	RNA binding	No	No	Detected	No	NA	NA	0.00679727
NCU00682	pkac-2	No	No	Detected	No	NA	NA	0.066663
NCU00693	eex-2	No	No	Detected	Yes	NA	NA	1.05917
NCU00707	hypothetical	Yes	Yes	Detected	Yes	NA	Wu_2014suppS6	2.16204
NCU00726	csr-1	No	Yes	Detected	Yes	NA	NA	-0.658087
NCU00768	mRNA binding	No	No	Detected	No	NA	Wu_2014suppS6	1.95959
NCU00772	mst-1	No	Yes	Detected	Yes	NA	NA	0.419035
NCU00914	stk-16	No	Yes	Detected	No	Hurley_2014	NA	0.730962
NCU00919	drh-16	No	Yes	Detected	No	NA	Wu_2014suppS6	2.47042
NCU00939	dcc-1	No	Yes	Detected	No	Smith_2010supp_AND_Sancar_2015	Chen_2009supp_Wu_2014suppS6_Sancar_2015supp	0.180594
NCU01008	rbg-14	No	No	Detected	No	NA	Wu_2014suppS6	0.564495
NCU01019	prd-2	No	No	Detected	Yes	NA	NA	0.528489
NCU01045	grn	No	No	Not_Detected	Not_Detected	NA	Wu_2014suppS6	0.362044
NCU01087	hypothetical	No	No	Not_Detected	Not_Detected	NA	NA	not_expressed
NCU01098	hypothetical	No	No	Not_Detected	Not_Detected	NA	NA	-0.609068
NCU01104	arh-2	No	Yes	Detected	Yes	NA	Wu_2014suppS6	1.6926
NCU01121	hypothetical	No	Yes	Detected	No	NA	Wu_2014suppS9_S6_Sancar_2015supp	1.60589
NCU01143	msp-8	No	No	Detected	No	NA	NA	0.752814
NCU01160	drh-4	No	Yes	Detected	Yes	NA	NA	0.847476
NCU01187	cpc-3	No	Yes	Detected	Yes	NA	Wu_2014suppS6	-0.10253
NCU01200	nup-5	No	No	Detected	No	NA	NA	-0.882011
NCU01206	set-1	No	No	Not_Detected	Not_Detected	NA	NA	1.066
NCU01221	crp-46	No	Yes	Detected	Yes	NA	NA	1.38799
NCU01234	drh-12	No	No	Detected	No	NA	NA	0.747053
NCU01290	snr-10	Yes	Yes	Detected	Yes	NA	Wu_2014suppS6	2.93534
NCU01331	crp-75	No	Yes	Detected	No	NA	NA	2.0563
NCU01335	cdc15	No	No	Detected	No	NA	NA	0.0909534
NCU01369	drh-9 // ded-1	No	Yes	Detected	No	NA	NA	3.23126
NCU01404	rmt-6	No	No	Detected	No	NA	Wu_2014suppS6	1.16533
NCU01414	asm-1	No	Yes	Detected	Yes	NA	Wu_2014suppS6	1.36982
NCU01418	ccg-6	No	Yes	Not_Detected	Not_Detected	Hurley_2014	NA	0.6413
NCU01435	stk-1	No	No	Detected	No	NA	NA	0.307348
NCU01455	hypothetical	No	No	Detected	No	NA	Wu_2014suppS6	0.34768
NCU01498	ime-2	No	Yes	Not_Detected	Not_Detected	Hurley_2014	NA	0.165103
NCU01504	calcineurin binding	No	Yes	Detected	No	Smith_2010supp	NA	1.11063
NCU01554	dmm-1	Yes	No	Detected	No	NA	NA	1.41622
NCU01601	snr-1	No	No	Detected	No	NA	NA	-0.296478
NCU01614	snr-22	No	No	Detected	No	NA	Wu_2014suppS6	0.335671
NCU01665	KH-domain	No	No	Detected	No	NA	NA	0.746263
NCU01695	nrd1	No	No	Detected	No	Hurley_2014	NA	-0.16726
NCU01700	hypothetical	No	No	Not_Detected	Not_Detected	NA	NA	-0.0840559
NCU01747	gde-1	Yes	Yes	Detected	No	NA	NA	-1.31786
NCU01751	abc-23	No	No	Detected	No	NA	NA	-1.8693
NCU01760	puf8	No	No	Not_Detected	Not_Detected	NA	NA	-0.412583
NCU01762	rbg-23	No	No	Not_Detected	Not_Detected	NA	NA	0.0813608
NCU01771	rad57	No	No	Not_Detected	Not_Detected	NA	NA	0.817682
NCU01776	crp-48	No	Yes	Detected	Yes	NA	Wu_2014suppS6	1.32318
NCU01793	mrs-7	No	Yes	Detected	No	NA	NA	0.59371
NCU01795	znf-11	No	No	Detected	No	NA	NA	0.661611
NCU01797	nrc-2	No	No	Detected	Yes	NA	Chen_2009supp	0.0832595
NCU01817	DIL, Ankyrin domain	Yes	Yes	Detected	No	NA	NA	0.367154
NCU01823	NA	No	No	Detected	No	Hurley_2014	NA	0.58079
NCU01833	nik-2	No	Yes	Detected	No	NA	NA	0.0129874
NCU01913	mrpp-2	No	No	Detected	No	NA	NA	0.706303
NCU01917	hypothetical	No	No	Not_Detected	Not_Detected	NA	NA	-0.123591
NCU01930	snr-7	No	No	Detected	No	NA	NA	-0.196492
NCU01932	set-3	No	No	Not_Detected	Not_Detected	NA	NA	0.426005
NCU01940	ptk-2	No	Yes	Detected	No	NA	NA	1.0316
NCU01949	un-16	Yes	Yes	Detected	No	NA	Wu_2014suppS6	1.41111
NCU01950	msp-13	No	No	Detected	No	NA	NA	-0.243631
NCU01954	msp-14	No	No	Detected	No	NA	NA	-0.587832
NCU01976	hypothetical	Yes	Yes	Not_Detected	Not_Detected	NA	NA	-0.552661
NCU01985	cys-11	No	No	Detected	No	NA	Wu_2014suppS6_Sancar_2015supp	3.37257
NCU02034	rid-1	No	No	Not_Detected	Not_Detected	NA	NA	-0.285852
NCU02057	luxQ	No	Yes	Detected	No	NA	NA	0.380002
NCU02060	mpr-10	No	No	Not_Detected	Not_Detected	NA	NA	-1.12694
NCU02076	eif3E	No	Yes	Detected	No	NA	Wu_2014suppS6	1.79097
NCU02152	cpsf6	No	No	Detected	Yes	NA	NA	0.531899
NCU02159	hypothetical	No	No	Detected	No	NA	Wu_2014suppS6	2.33138
NCU02178	sad-1	No	No	Not_Detected	Not_Detected	NA	NA	-0.210084
NCU02181	crp-11	No	Yes	Detected	Yes	NA	NA	1.24732
NCU02202	stk-14	No	Yes	Detected	No	NA	NA	-0.688953
NCU02234	mik-1	Yes	No	Detected	No	NA	NA	-0.0281184
NCU02245	stk-19	No	No	Detected	No	NA	NA	0.926833
NCU02247	dim-2	No	Yes	Not_Detected	Not_Detected	NA	Wu_2014suppS6	0.613372
NCU02265	frq	No	Yes	Not_Detected	Not_Detected	Smith_2010main_supp_AND_Hurley_2014_AND_Sancar_2015	Chen_2009supp_Wu_2014suppS9_S6_Sancar_2015supp	0.0391314
NCU02283	camk-2	Yes	No	Detected	No	NA	NA	-0.238044
NCU02286	hypothetical	No	No	Detected	Yes	NA	NA	0.632806
NCU02364	znf-29	No	Yes	Not_Detected	Not_Detected	NA	NA	-0.105561
NCU02385	hypothetical	No	No	Detected	No	NA	Wu_2014suppS9_S6	0.430707
NCU02393	mak-2	No	No	Detected	No	NA	Wu_2014suppS6	-0.674387
NCU02404	RNP domain	Yes	No	Detected	No	NA	NA	-0.0625592
NCU02405	hypothetical	No	Yes	Detected	No	NA	NA	-0.311523
NCU02406	nuclear protein	No	No	Not_Detected	Not_Detected	NA	Wu_2014suppS6	1.51501
NCU02428	rbg-24	No	Yes	Detected	No	NA	Wu_2014suppS6	0.693901
NCU02432	DnaJ domain	No	Yes	Detected	No	NA	Wu_2014suppS6	0.0178209
NCU02467	snr-19	No	No	Detected	No	NA	Wu_2014suppS6	0.439908
NCU02508	snr-23	No	No	Detected	No	NA	NA	0.638146
NCU02511	tcmt-1	No	Yes	Detected	No	NA	Wu_2014suppS9_S6	2.25572
NCU02582	rco-3	No	No	Not_Detected	Not_Detected	NA	NA	-0.462594
NCU02594	hypothetical	No	Yes	Not_Detected	Not_Detected	Smith_2010supp	NA	-0.382249
NCU02611	rrn-3	No	No	Not_Detected	Not_Detected	NA	Wu_2014suppS6	2.26279
NCU02614	nup-13	No	No	Detected	Yes	NA	Wu_2014suppS6	0.100407
NCU02619	tdus-3	No	No	Detected	No	NA	Wu_2014suppS6	1.04066
NCU02633	nuclear mRNA splicing	No	No	Detected	No	NA	NA	-0.108837
NCU02661	rpo-7	No	No	Detected	No	NA	NA	-0.0419067
NCU02685	mrpp-7	No	No	Detected	No	NA	Wu_2014suppS6	0.340542
NCU02696	mrpp-8 // prp-5	No	No	Detected	No	NA	NA	0.237905
NCU02707	crp-39	No	Yes	Detected	Yes	NA	NA	1.28702
NCU02713	csp-1	Yes	Yes	Not_Detected	Not_Detected	Smith_2010main_supp_AND_Hurley_2014_AND_Sancar_2015	Chen_2009supp_Wu_2014suppS9_S6_Sancar_2015supp	0.202074
NCU02717	msp-17	No	No	Detected	No	NA	NA	0.0917258
NCU02720	hypothetical	Yes	Yes	Detected	Yes	NA	NA	1.97592
NCU02728	msp-18 // prp16	No	No	Detected	No	NA	NA	0.65544
NCU02736	hypothetical	No	No	Detected	No	NA	NA	0.0502987
NCU02741	mei-3	Yes	Yes	Not_Detected	Not_Detected	NA	NA	-0.651203
NCU02751	mus-59	No	No	Detected	No	NA	NA	0.508463
NCU02764	rsp	No	Yes	Not_Detected	Not_Detected	Hurley_2014	NA	-0.804122
NCU02765	RNA binding	Yes	Yes	Detected	No	NA	Chen_2009supp_Wu_2014suppS9_S6_Sancar_2015supp	0.165744
NCU02780	unr-2	No	No	Detected	No	NA	NA	1.11801
NCU02791	hypothetical	No	No	Not_Detected	Not_Detected	Smith_2010supp	NA	0.810568
NCU02803	msp-19 // prp-28	No	Yes	Detected	No	NA	NA	0.0803561
NCU02814	prd-4 // chk2	No	Yes	Detected	No	NA	Wu_2014suppS6	-0.119247
NCU02815	os-1	No	No	Detected	Yes	Hurley_2014	Wu_2014suppS6	-0.307371
NCU02837	splicing	No	Yes	Detected	No	NA	NA	-0.0587933
NCU02885	stk-20	No	Yes	Detected	No	Hurley_2014	NA	-0.201404
NCU02961	rbg-28	No	No	Not_Detected	Not_Detected	NA	NA	0.4881
NCU02967	ankyrin repeat domain	No	No	Detected	No	NA	NA	-0.597418
NCU03007	msp-21	No	No	Detected	No	NA	NA	0.46636
NCU03038	crp-21	No	Yes	Detected	No	NA	Wu_2014suppS6	1.07262
NCU03039	splicing u2af	No	No	Detected	No	NA	NA	0.818888
NCU03048	znf-57	No	No	Not_Detected	Not_Detected	NA	NA	0.277708
NCU03051	rbg-12	No	Yes	Detected	Yes	NA	Wu_2014suppS9_S6	2.63941
NCU03085	snr-8	No	Yes	Detected	No	NA	NA	0.410867
NCU03092	NLS binding protein	No	Yes	Detected	Yes	Sancar_2015	Wu_2014suppS9_S6	2.88057
NCU03124	prd-3 // cka	No	Yes	Detected	No	NA	NA	-0.337656
NCU03149	tad-2	No	No	Not_Detected	Not_Detected	NA	NA	-0.31332
NCU03150	crp-83	No	Yes	Detected	Yes	NA	Wu_2014suppS6	1.39755
NCU03164	NA	No	No	Detected	Yes	NA	NA	-0.141733
NCU03169	hypothetical	No	No	Not_Detected	Not_Detected	Smith_2010supp	NA	-0.145157
NCU03187	nim-1	No	No	Not_Detected	Not_Detected	NA	NA	-0.0568746
NCU03197	stk-11	No	Yes	Not_Detected	Not_Detected	NA	NA	0.888124
NCU03200	stk-10	No	Yes	Detected	Yes	NA	NA	0.339707
NCU03226	y14	No	No	Detected	No	NA	NA	-0.00968914
NCU03242	stk-21	No	No	Not_Detected	Not_Detected	NA	NA	0.195316
NCU03261	msp-23	No	Yes	Detected	No	NA	NA	0.227716
NCU03285	mrs-11	No	No	Detected	No	NA	NA	0.680209
NCU03302	crp-72	No	Yes	Detected	Yes	NA	NA	1.10962
NCU03311	paa-4	No	Yes	Detected	Yes	NA	NA	1.00331
NCU03337	recQ-2	Yes	No	Not_Detected	Not_Detected	NA	Sancar_2015supp	-0.341504
NCU03394	mrp-15	No	Yes	Detected	Yes	NA	NA	0.945097
NCU03435	upf3	No	No	Detected	No	NA	NA	0.0765019
NCU03491	pad-1	No	Yes	Detected	Yes	NA	NA	0.449157
NCU03523	stk-22	No	Yes	Detected	No	Smith_2010supp_AND_Sancar_2015	NA	0.32704
NCU03565	crp-57	No	Yes	Detected	Yes	NA	NA	0.848262
NCU03571	stk-23	No	No	Detected	No	NA	NA	0.0623674
NCU03591	abc-18	No	No	Detected	No	NA	NA	0.891962
NCU03616	ras-2	No	Yes	Detected	Yes	NA	NA	0.869491
NCU03652	snf2-1	No	No	Not_Detected	Not_Detected	NA	NA	-0.370326
NCU03659	prk-3	No	No	Detected	No	NA	Wu_2014suppS6	-0.0792227
NCU03702	rbg-16	No	Yes	Detected	Yes	NA	Wu_2014suppS9_S6	2.75276
NCU03717	eif4E-2	No	No	Detected	Yes	NA	Wu_2014suppS6	-0.682246
NCU03725	vib-1	No	No	Detected	Yes	Hurley_2014_AND_Sancar_2015	NA	2.31045
NCU03766	snr-5	No	No	Detected	No	NA	Wu_2014suppS6	-0.548027
NCU03768	lpl-2	No	No	Detected	No	NA	Wu_2014suppS9_S6	1.14852
NCU03778	snr-13	No	Yes	Detected	Yes	Sancar_2015	NA	1.21131
NCU03796	stk-24	No	Yes	Detected	Yes	Sancar_2015	NA	0.491669
NCU03806	cyh-2	No	Yes	Detected	No	NA	NA	1.25352
NCU03808	msp-25 // prp16	No	Yes	Not_Detected	Not_Detected	NA	Wu_2014suppS9_S6	2.2987
NCU03846	DRAP deaminase	No	Yes	Detected	Yes	NA	NA	0.254014
NCU03853	nup-17	No	No	Detected	No	NA	Wu_2014suppS6	0.819429
NCU03894	stk-4	No	No	Detected	No	NA	NA	0.585761
NCU03897	Scp160	No	Yes	Detected	No	NA	Wu_2014suppS6	1.16141
NCU03946	pabp-2	Yes	Yes	Detected	No	NA	NA	0.277427
NCU04005	ck-1b	No	Yes	Detected	No	Hurley_2014	NA	1.03679
NCU04009	eex-1	No	No	Detected	No	NA	NA	0.212753
NCU04022	znf-27	No	Yes	Detected	Yes	NA	Wu_2014suppS6	1.35958
NCU04041	drh-14 // mak-5	Yes	Yes	Not_Detected	Not_Detected	NA	Wu_2014suppS9_S6	1.30066
NCU04073	hypothetical	No	No	Detected	No	NA	NA	0.740119
NCU04096	prk-9	No	No	Not_Detected	Not_Detected	Sancar_2015	NA	0.424439
NCU04110	bbp-1	No	Yes	Detected	Yes	NA	Wu_2014suppS6	0.54194
NCU04117	abc-7 // mdl2	No	No	Detected	No	NA	NA	1.13716
NCU04143	stk-26	No	Yes	Not_Detected	Not_Detected	Smith_2010supp	Wu_2014suppS6	-0.707752
NCU04153	psu-1	No	No	Detected	No	NA	NA	1.93071
NCU04155	eex-5	No	Yes	Detected	No	NA	NA	1.83616
NCU04164	hypothetical	Yes	No	Detected	No	NA	NA	2.04227
NCU04182	msp-27	No	No	Detected	No	NA	NA	0.629251
NCU04185	gsk-3	No	Yes	Detected	Yes	Smith_2010supp_AND_Hurley_2014	NA	-1.06518
NCU04242	upf1 // prd-6	No	No	Detected	No	NA	NA	0.377508
NCU04254	hypothetical	No	No	Detected	No	NA	NA	-0.120844
NCU04259	stk-27	No	No	Detected	No	NA	NA	0.865317
NCU04273	RNA binding	No	No	Detected	No	NA	Wu_2014suppS9_S6_Sancar_2015supp	2.04475
NCU04279	stk-28	No	No	Detected	No	NA	NA	0.868456
NCU04294	sad-2	No	No	Not_Detected	Not_Detected	NA	NA	not_expressed
NCU04326	stk-29	No	No	Not_Detected	Not_Detected	NA	NA	0.141036
NCU04331	crp-4	No	Yes	Detected	Yes	NA	Wu_2014suppS6	1.40094
NCU04335	stk-30	No	No	Detected	No	NA	NA	1.01153
NCU04336	mrp-28	Yes	Yes	Detected	No	NA	NA	1.00684
NCU04402	dim-5	No	No	Detected	No	NA	NA	0.0499129
NCU04417	hypothetical	No	No	Not_Detected	Not_Detected	NA	Chen_2009supp	not_expressed
NCU04426	div-4	No	No	Detected	No	NA	NA	0.13793
NCU04439	drh-3	No	Yes	Detected	No	NA	Wu_2014suppS9_S6	1.94735
NCU04444	hypothetical	No	Yes	Detected	No	NA	Wu_2014suppS6	-0.965212
NCU04455	hypothetical	No	Yes	Detected	No	NA	NA	2.0972
NCU04490	NA	No	No	Not_Detected	Not_Detected	NA	NA	not_expressed
NCU04504	drh-17	No	Yes	Detected	No	NA	NA	2.58727
NCU04566	prk-10	No	No	Detected	No	NA	NA	-1.18871
NCU04595	prk-11	No	No	Detected	No	NA	NA	1.31307
NCU04611	trf-4	No	No	Detected	No	NA	NA	0.627625
NCU04747	stk-31	No	No	Detected	No	NA	NA	0.248586
NCU04755	stk-32	No	Yes	Detected	Yes	NA	NA	0.436111
NCU04772	cvc-7	No	No	Detected	No	NA	NA	0.330905
NCU04799	pabp	No	Yes	Detected	Yes	NA	NA	3.17241
NCU04805	hypothetical	No	No	Detected	No	NA	Wu_2014suppS9_S6_Sancar_2015supp	-2.22525
NCU04834	phy-1	Yes	Yes	Not_Detected	Not_Detected	Smith_2010supp	NA	0.0810163
NCU04963	hgt-2	Yes	Yes	Detected	Yes	NA	Chen_2009supp_Wu_2014suppS9_S6	-4.04485
NCU04990	stk-17	No	Yes	Not_Detected	Not_Detected	Hurley_2014	NA	0.807942
NCU05007	div-20	No	Yes	Detected	Yes	NA	Chen_2009supp	1.01943
NCU05145	hypothetical	No	No	Detected	No	NA	Sancar_2015supp	-0.194465
NCU05210	uvs-2	No	Yes	Not_Detected	Not_Detected	NA	NA	0.122114
NCU05217	exr-2	No	No	Detected	Yes	NA	NA	0.878617
NCU05218	hat-4	No	Yes	Not_Detected	Not_Detected	NA	NA	-0.055558
NCU05246	dnr-13	No	Yes	Detected	No	NA	NA	-1.43155
NCU05266	KH-domain	No	No	Detected	No	Hurley_2014	NA	0.422911
NCU05267	upf2	No	No	Detected	No	Smith_2010supp	NA	0.510446
NCU05274	eif5A	No	Yes	Detected	No	NA	NA	0.383625
NCU05275	crp-79	No	No	Not_Detected	Not_Detected	NA	NA	-1.29263
NCU05316	pfs domain	No	Yes	Not_Detected	Not_Detected	Smith_2010supp	NA	-0.194793
NCU05343	R3H domain	No	Yes	Detected	Yes	NA	NA	0.938182
NCU05480	hypothetical	No	No	Not_Detected	Not_Detected	NA	NA	not_expressed
NCU05481	hypothetical	No	No	Not_Detected	Not_Detected	NA	NA	not_expressed
NCU05488	Vip1	No	No	Detected	No	Sancar_2015	Wu_2014suppS6	-0.825094
NCU05600	stk-33	No	Yes	Detected	Yes	NA	NA	-0.889006
NCU05602	hypothetical	No	No	Detected	No	NA	NA	1.18746
NCU05638	stk-34	No	Yes	Detected	No	NA	NA	0.410948
NCU05655	stk-35	No	No	Not_Detected	Not_Detected	NA	NA	not_expressed
NCU05658	stk-36	No	No	Not_Detected	Not_Detected	NA	NA	-0.104602
NCU05782	drh-2	Yes	Yes	Detected	Yes	NA	Wu_2014suppS6	3.03106
NCU05790	phy-2	No	No	Not_Detected	Not_Detected	NA	NA	-0.219901
NCU05800	znf-54	No	No	Detected	Yes	NA	NA	1.06939
NCU05802	msp-31	No	No	Detected	Yes	NA	NA	0.658391
NCU05808	tkl-1	No	No	Detected	No	NA	NA	0.00724103
NCU05950	uv90	No	Yes	Not_Detected	Not_Detected	NA	NA	0.585475
NCU05968	hypothetical	No	No	Not_Detected	Not_Detected	NA	NA	0.0585501
NCU06006	stk-37	No	Yes	Not_Detected	Not_Detected	NA	NA	-1.01947
NCU06047	crp-9	No	Yes	Detected	No	NA	Wu_2014suppS6	1.12503
NCU06118	hypothetical	No	Yes	Not_Detected	Not_Detected	NA	Wu_2014suppS6	2.29917
NCU06119	set-5	No	No	Not_Detected	Not_Detected	NA	Wu_2014suppS6	0.852206
NCU06135	hypothetical	No	No	Not_Detected	Not_Detected	NA	NA	-0.667176
NCU06149	drh-10	No	No	Detected	No	NA	NA	0.209648
NCU06177	camk-3	No	Yes	Detected	No	NA	NA	-0.168127
NCU06179	stk-5	No	Yes	Detected	No	NA	NA	-0.032749
NCU06182	nrc-1	No	Yes	Detected	No	NA	NA	0.185066
NCU06199	puf1	No	Yes	Detected	No	NA	Wu_2014suppS6	0.656023
NCU06202	stk-38	No	No	Detected	Yes	Smith_2010supp	NA	-0.0358174
NCU06205	rco-1	No	No	Detected	Yes	NA	NA	0.385677
NCU06217	rbg-31	Yes	Yes	Detected	No	NA	Wu_2014suppS9_S6	2.70241
NCU06230	stk-39	No	Yes	Not_Detected	Not_Detected	Smith_2010supp_AND_Hurley_2014	NA	-0.621264
NCU06240	pkac-1	No	Yes	Detected	No	NA	NA	0.599494
NCU06246	drh-15	No	No	Detected	Yes	NA	NA	0.737028
NCU06249	stk-40	No	No	Detected	No	Smith_2010supp	NA	0.165932
NCU06251	KH-domain	No	No	Detected	No	NA	NA	-0.691649
NCU06272	mrp-72	Yes	Yes	Detected	No	NA	Wu_2014suppS9_S6	2.55026
NCU06283	hypothetical	No	Yes	Not_Detected	Not_Detected	NA	NA	-0.721417
NCU06312	gpr-4	No	Yes	Not_Detected	Not_Detected	NA	NA	0.0904371
NCU06336	tRNA methyltransferase	No	Yes	Detected	No	NA	Wu_2014suppS6	1.67333
NCU06354	snr-11	No	Yes	Detected	No	NA	Wu_2014suppS6	0.404613
NCU06365	dbh-3	No	Yes	Not_Detected	Not_Detected	NA	NA	-0.632914
NCU06418	drh-6 // dbp-8	No	Yes	Detected	No	NA	Wu_2014suppS6	1.58226
NCU06419	mek-1	No	Yes	Detected	Yes	NA	NA	-1.10387
NCU06421	stk-41	No	Yes	Not_Detected	Not_Detected	Smith_2010supp	NA	not_expressed
NCU06422	stk-42	Yes	No	Not_Detected	Not_Detected	NA	NA	0.181181
NCU06459	hypothetical	No	No	Detected	Yes	NA	Wu_2014suppS6	1.71183
NCU06486	stk-43	No	No	Not_Detected	Not_Detected	NA	NA	-0.67236
NCU06511	puf3	No	No	Detected	No	NA	NA	0.0273757
NCU06544	pkc	No	Yes	Detected	Yes	NA	NA	0.18016
NCU06553	hypothetical	No	No	Not_Detected	Not_Detected	Smith_2010supp_AND_Sancar_2015	Wu_2014suppS6_Sancar_2015supp	1.66782
NCU06565	Septal Pore	No	No	Not_Detected	Not_Detected	NA	NA	-0.452535
NCU06583	stk-44	No	No	Not_Detected	Not_Detected	NA	Sancar_2015supp	-0.352997
NCU06619	mtr	No	Yes	Not_Detected	Not_Detected	NA	NA	1.13052
NCU06638	stk-46	No	No	Detected	No	Sancar_2015	NA	1.07281
NCU06684	RNA binding	No	No	Detected	Yes	NA	NA	1.49844
NCU06685	stk-47	No	No	Not_Detected	Not_Detected	NA	NA	0.0592667
NCU06718	paa-8	No	No	Detected	No	NA	NA	0.586622
NCU06735	msp-34	No	No	Detected	No	NA	NA	-0.523619
NCU06739	ppi-7	No	No	Detected	No	NA	NA	0.195101
NCU06760	stk-48	Yes	Yes	Detected	Yes	NA	NA	-0.638276
NCU06766	dcl-2	No	Yes	Not_Detected	Not_Detected	NA	NA	-0.390689
NCU06780	tum-1	No	Yes	Detected	No	NA	Wu_2014suppS9_S6	1.15285
NCU06788	hypothetical	No	No	Detected	No	NA	NA	0.789552
NCU06842	rcm-1	No	No	Detected	Yes	Sancar_2015	NA	1.05712
NCU06894	nup-28	No	No	Detected	No	NA	NA	-0.0144528
NCU06950	hypothetical	No	No	Not_Detected	Not_Detected	NA	NA	0.346183
NCU06959	hypothetical	No	Yes	Detected	Yes	NA	NA	0.549055
NCU06965	hypothetical	No	No	Not_Detected	Not_Detected	NA	NA	-0.126595
NCU07024	os-2	No	Yes	Detected	No	Smith_2010supp	Chen_2009supp_Wu_2014suppS6	0.579016
NCU07029	hypothetical	No	No	Not_Detected	Not_Detected	NA	NA	-0.912427
NCU07032	hypothetical	Yes	Yes	Not_Detected	Not_Detected	NA	NA	-0.424311
NCU07041	rbg-46	No	Yes	Detected	No	NA	Wu_2014suppS9_S6	2.06856
NCU07062	stk-49	No	No	Detected	No	NA	NA	0.424475
NCU07069	mrpp-5	No	No	Detected	No	NA	Wu_2014suppS6	1.04462
NCU07070	drh-7 // dbp-9	No	Yes	Detected	No	NA	Wu_2014suppS9_S6	2.61793
NCU07221	hcp-1	Yes	Yes	Detected	Yes	Smith_2010supp_AND_Sancar_2015	Chen_2009supp_Wu_2014suppS6	0.234309
NCU07246	div-11 // Swi4	No	No	Detected	No	NA	Wu_2014suppS9_S6	0.509221
NCU07280	stk-50	No	No	Detected	No	Hurley_2014	NA	0.440104
NCU07296	cot-1	No	Yes	Detected	Yes	NA	Chen_2009supp_Sancar_2015supp	-0.041546
NCU07331	rbg-56	No	Yes	Not_Detected	Not_Detected	NA	NA	1.9247
NCU07378	stk-12	No	No	Detected	No	Smith_2010supp	NA	-0.383881
NCU07382	snr-2	No	No	Detected	No	NA	NA	-0.325892
NCU07392	adv-1	No	Yes	Not_Detected	Not_Detected	Smith_2010main_supp_AND_Hurley_2014_AND_Sancar_2015	Wu_2014suppS6	1.45444
NCU07399	stk-9	Yes	Yes	Detected	No	Sancar_2015	NA	0.504008
NCU07411	polt-1	No	Yes	Not_Detected	Not_Detected	NA	NA	-0.239563
NCU07418	znf-56	No	Yes	Detected	No	NA	NA	-0.270084
NCU07420	eif4A	No	No	Detected	No	NA	Wu_2014suppS6	2.54202
NCU07421	Septal Pore	No	Yes	Detected	No	NA	NA	0.826747
NCU07437	eif1A	Yes	Yes	Detected	No	NA	Wu_2014suppS6	1.27149
NCU07496	set-7	No	No	Not_Detected	Not_Detected	NA	NA	0.177027
NCU07534	qde-1	No	Yes	Not_Detected	Not_Detected	NA	NA	0.893134
NCU07548	hypothetical	No	Yes	Detected	No	NA	NA	1.03557
NCU07559	hypothetical	No	No	Not_Detected	Not_Detected	NA	NA	-0.204688
NCU07574	hypothetical	Yes	No	Detected	No	NA	Wu_2014suppS6	1.35303
NCU07580	mdk-1	No	Yes	Detected	Yes	NA	NA	-0.00318624
NCU07587	div-16 // Swi6	No	Yes	Detected	No	NA	Wu_2014suppS6	0.396085
NCU07670	cyt-19	Yes	Yes	Detected	Yes	NA	Wu_2014suppS9_S6	2.68613
NCU07683	snr-4	No	No	Detected	No	NA	NA	-0.248021
NCU07699	hypothetical	Yes	Yes	Detected	No	Sancar_2015	NA	0.701474
NCU07712	drh-8 // dbp-10	No	Yes	Detected	No	NA	Wu_2014suppS6	2.31716
NCU07722	rgb-40	No	No	Detected	No	NA	NA	2.27902
NCU07731	hypothetical	No	Yes	Detected	No	NA	Wu_2014suppS6	1.86822
NCU07735	tcg1 // grp1	No	Yes	Detected	No	NA	NA	1.20415
NCU07788	col-26	No	No	Detected	No	Hurley_2014_AND_Sancar_2015	NA	0.132081
NCU07832	msp-39	No	No	Detected	Yes	NA	NA	0.532542
NCU07839	prd-1	Yes	Yes	Detected	No	NA	Wu_2014suppS6	2.91302
NCU07868	eif4G	No	No	Detected	Yes	NA	NA	2.61766
NCU07872	prk-2	No	Yes	Detected	No	NA	NA	0.238742
NCU07874	pub1	No	Yes	Detected	No	NA	NA	-0.374449
NCU07878	hypothetical	No	Yes	Detected	No	NA	NA	1.03734
NCU07880	prk-6	No	Yes	Not_Detected	Not_Detected	NA	NA	0.745179
NCU07883	hypothetical	No	Yes	Detected	Yes	NA	NA	-0.218665
NCU07934	hypothetical	No	No	Not_Detected	Not_Detected	NA	NA	-0.829746
NCU07956	rrm-10	No	Yes	Detected	No	NA	Wu_2014suppS6	2.4856
NCU07975	dnr-12	No	No	Detected	No	NA	NA	-0.301811
NCU08034	snr-16	No	No	Detected	No	NA	NA	0.747125
NCU08046	eif3g	No	Yes	Detected	Yes	NA	NA	1.5285
NCU08177	stk-51	No	No	Detected	No	NA	NA	-0.104774
NCU08218	ptr-1	No	Yes	Detected	No	Smith_2010supp	NA	0.208207
NCU08267	RNA helicase	No	Yes	Detected	No	NA	NA	-0.354805
NCU08270	sms-3	No	No	Not_Detected	Not_Detected	NA	Wu_2014suppS6	0.404518
NCU08277	eif2a	No	Yes	Detected	No	NA	NA	1.76848
NCU08289	dmm-2	No	No	Detected	No	NA	Wu_2014suppS6	0.594757
NCU08295	La domain	Yes	Yes	Detected	No	NA	Wu_2014suppS9_S6	2.4171
NCU08299	mrp-48	No	Yes	Detected	Yes	NA	NA	1.64174
NCU08332	hex-1	No	No	Detected	No	Sancar_2015	Wu_2014suppS6	1.15158
NCU08346	mus-58	No	No	Not_Detected	Not_Detected	NA	NA	-0.0588823
NCU08377	cr-1	No	No	Detected	Yes	Smith_2010supp	NA	0.122482
NCU08435	rrp3	No	Yes	Detected	Yes	NA	NA	-0.823096
NCU08502	crp-14	No	Yes	Detected	No	Smith_2010supp	Wu_2014suppS6	1.11967
NCU08514	ppi-6	No	No	Detected	No	NA	NA	0.022582
NCU08518	hypothetical	No	Yes	Detected	No	NA	Wu_2014suppS9_S6	3.05354
NCU08595	rbg-49	No	Yes	Detected	No	NA	Wu_2014suppS9_S6	2.55118
NCU08598	qde-3	No	Yes	Not_Detected	Not_Detected	NA	NA	0.21163
NCU08660	trn-4	No	No	Not_Detected	Not_Detected	NA	NA	-0.108437
NCU08663	rbg-43	No	No	Detected	No	NA	Wu_2014suppS6	2.1093
NCU08678	trl-4	No	Yes	Detected	No	NA	Wu_2014suppS6	-0.295271
NCU08776	hypothetical	No	Yes	Not_Detected	Not_Detected	NA	NA	0.79276
NCU08807	cre-1	Yes	Yes	Detected	Yes	Smith_2010main_supp_AND_Hurley_2014_AND_Sancar_2015	Wu_2014suppS6	1.65794
NCU08880	aap-18	No	No	Not_Detected	Not_Detected	NA	Wu_2014suppS6	0.650079
NCU08888	tRNA synthetase	No	No	Detected	No	NA	NA	1.23037
NCU08903	rbg-20	No	Yes	Detected	Yes	NA	Wu_2014suppS6	2.34542
NCU08920	abc-24	Yes	Yes	Detected	No	NA	NA	1.92283
NCU08923	znf-53	Yes	Yes	Detected	Yes	NA	Wu_2014suppS9_S6	3.29212
NCU08933	nucleic acid binding	No	No	Not_Detected	Not_Detected	NA	NA	0.043313
NCU08942	dnr-22	No	No	Not_Detected	Not_Detected	Sancar_2015	NA	0.316579
NCU08963	crp-61	No	Yes	Detected	No	NA	NA	2.2708
NCU08983	un-17	No	Yes	Detected	No	NA	NA	0.566037
NCU09014	cpsf5	No	No	Detected	No	NA	NA	0.49695
NCU09048	hypothetical	No	No	Detected	No	NA	Wu_2014suppS6	0.561042
NCU09058	ech-5	No	Yes	Detected	No	NA	NA	-0.520121
NCU09064	stk-53	No	No	Not_Detected	Not_Detected	NA	NA	-0.225471
NCU09071	dbf-2	No	Yes	Detected	No	NA	NA	0.285216
NCU09076	hel-4	No	Yes	Detected	Yes	NA	Wu_2014suppS6	0.857027
NCU09093	drh-19	No	No	Not_Detected	Not_Detected	NA	NA	0.310441
NCU09123	camk-1	No	Yes	Detected	No	NA	Wu_2014suppS6	-0.495462
NCU09131	nop12	Yes	Yes	Detected	No	NA	Wu_2014suppS6	2.25823
NCU09184	iad-1	No	No	Not_Detected	Not_Detected	NA	NA	not_expressed
NCU09189	stk-54	No	No	Not_Detected	Not_Detected	NA	NA	not_expressed
NCU09202	mdk-2	No	No	Detected	No	NA	NA	0.113474
NCU09211	sad-3	No	No	Not_Detected	Not_Detected	NA	NA	-0.0512497
NCU09212	camk-4	No	No	Detected	Yes	Hurley_2014	NA	-0.399705
NCU09254	msp-44 // prp16	No	No	Not_Detected	Not_Detected	NA	NA	0.555821
NCU09258	cdc5	No	No	Not_Detected	Not_Detected	NA	Wu_2014suppS6	0.27748
NCU09318	dnh-2	No	Yes	Not_Detected	Not_Detected	NA	NA	0.0141482
NCU09349	drh-13	Yes	Yes	Detected	No	NA	Wu_2014suppS9_S6	2.82497
NCU09352	KH-domain	No	No	Detected	No	Smith_2010supp	NA	1.89161
NCU09365	hypothetical	No	Yes	Not_Detected	Not_Detected	NA	NA	-0.406283
NCU09380	pumilio domain	No	Yes	Detected	Yes	NA	Wu_2014suppS9_S6	2.77973
NCU09434	sms-2	No	No	Not_Detected	Not_Detected	NA	NA	-0.00487673
NCU09437	rbg-1	No	Yes	Not_Detected	Not_Detected	NA	Wu_2014suppS9_S6	2.0816
NCU09475	crp-13	No	Yes	Detected	Yes	NA	Wu_2014suppS6	1.26006
NCU09512	snr-3	No	Yes	Detected	No	NA	NA	-0.287729
NCU09520	NA	No	No	Not_Detected	Not_Detected	NA	NA	1.2413
NCU09539	mrp-13	No	No	Detected	No	NA	NA	0.0749265
NCU09546	eif4E-3	No	No	Detected	No	NA	NA	0.921904
NCU09595	stk-55	No	Yes	Not_Detected	Not_Detected	NA	Wu_2014suppS9_S6	2.06506
NCU09598	msp-45	No	Yes	Detected	Yes	NA	NA	-1.12484
NCU09613	hypothetical	No	No	Not_Detected	Not_Detected	NA	NA	-0.704412
NCU09696	srp54	No	No	Detected	No	NA	NA	0.00220766
NCU09742	div-56	No	Yes	Not_Detected	Not_Detected	NA	NA	-0.122543
NCU09760	hypothetical	No	Yes	Detected	No	NA	NA	-0.85433
NCU09778	cdc28	No	Yes	Detected	No	NA	NA	0.10966
NCU09793	dbh-5	No	No	Not_Detected	Not_Detected	NA	NA	-0.14362
NCU09826	mrp-62	Yes	Yes	Detected	No	NA	Wu_2014suppS6	1.1023
NCU09842	mak-1	No	Yes	Detected	Yes	NA	Wu_2014suppS6	0.606162
NCU09880	snr-15	No	Yes	Detected	No	NA	NA	0.32071
NCU09901	mrs-6	No	No	Detected	Yes	NA	NA	1.03717
NCU09903	eef3-2	Yes	Yes	Detected	Yes	NA	Wu_2014suppS6	2.54323
NCU09973	hypothetical	No	No	Not_Detected	Not_Detected	NA	NA	-0.847227
NCU10004	stk-56	No	No	Not_Detected	Not_Detected	NA	NA	not_expressed
NCU10021	hgt-1	No	No	Detected	No	NA	Chen_2009supp_Wu_2014suppS9_S6	-4.20091
NCU10166	ppi-4	No	No	Detected	No	NA	NA	0.0766158
NCU10185	tipt-1	No	No	Not_Detected	Not_Detected	NA	NA	1.40404
NCU10352	snr-6	No	No	Detected	No	NA	NA	-0.306255
NCU10388	ppi-3	No	No	Detected	No	NA	NA	0.843491
NCU10733	par-1	No	Yes	Detected	No	NA	Wu_2014suppS6	0.249578
NCU10853	stk-57	No	No	Detected	Yes	NA	NA	0.36986
NCU11050	DUF455 domain	No	No	Detected	Yes	NA	Wu_2014suppS9_S6	0.75781
NCU11175	drh-11 // drs-1	No	Yes	Detected	Yes	NA	Wu_2014suppS9_S6	2.68827
NCU11197	rpo-27	No	No	Detected	No	NA	NA	0.818635
NCU11234	trl-3	No	No	Detected	Yes	NA	Wu_2014suppS6	1.44485
NCU11235	pod-6	No	Yes	Detected	No	NA	NA	0.0491572
NCU11426	nuc-2	No	Yes	Detected	Yes	Hurley_2014	Chen_2009supp_Sancar_2015supp	-0.862566
NCU12036	hypothetical	No	No	Not_Detected	Not_Detected	NA	NA	not_expressed
NCU16397	nab2	No	No	Detected	No	Sancar_2015	NA	0.414606
NCU16466	nucleic acid binding	Yes	Yes	Detected	Yes	NA	NA	1.69643
NCU16560	puf4	No	No	Detected	No	NA	NA	-0.0250959
NCU16757	H/ACA ribonucleoprotein	No	Yes	Detected	No	NA	Wu_2014suppS9_S6	2.66434
NCU16821	stk-58	Yes	Yes	Detected	No	NA	NA	-0.882917
NCU17030	hrp1	No	No	Detected	No	NA	NA	-0.0568816
NCU17061	DnaJ domain	No	Yes	Not_Detected	Not_Detected	NA	Wu_2014suppS6	0.0237205
NCU17247	hypothetical	No	No	Not_Detected	Not_Detected	NA	NA	not_expressed
