# Supplementary material for: Nutritional compensation of the circadian clock is a conserved process influenced by gene expression regulation and mRNA stability
Source: PLoS Biol. 2023 Jan 5;21(1):e3001961. doi: 10.1371/journal.pbio.3001961 (PMC9848017; doi:10.1371/journal.pbio.3001961)
Supplement: S11 Data — The first, second, and third tabs of the Data File correspond to raw and processed traces as well as circadian period lengths for S7A Fig. The fourth, fifth, and sixth tabs of the Data File correspond to raw and processed traces as well as circadian period lengths for S7B Fig. The seventh and eighth tabs of the Data File correspond to raw and processed traces as well as circadian period lengths for S7C Fig. (XLSX) [file pbio.3001961.s026.xlsx]

## Sheet: SFig7_A_Traces
Biological replicates:	Time Point (hr)	swd2_rep1	swd2_rep2	swd2_rep3	sdc1_rep1	sdc1_rep2	sdc1_rep3	WT_rep1	WT_rep2	WT_rep3	swd1_rep4	swd1_rep5	WT_swd1_rep4	WT_swd1_rep5		Smoothed Average:				Time Point	swd2_avg	sdc1_avg	WT_avg	swd1_avg	WT_swd1_avg				Standard Deviation:		Time Point	swd2_stdev	sdc1_stdev	WT_stdev	swd1_stdev	WT_swd1_stdev			Plots in Figures S7 are of the smoothed average plus/minus the standard deviation
swd2, sdc1, WT run together	0	890.667	766	945.667	666	722	740.333	634	484.333	541.333	591	635.333	507	399.667		This was calculated using an R code that smoothes by averaging time point n with the time point before and after it, but weights the current timepoint twice as much as the timepoints before and after it: (1,2,1), to prevent amplitude reduction				1	832.167	679.389	478.283	563.125	412.667				Standard Deviation was calculated between replicates for each time point using an R code		1	87.0692	31.8608	88.6142	43.6638	82.6136
swd1 and WT_swd1 (WT present on that plate) were run together	1	835.333	736.333	901.667	643.667	676	690.333	589	442.667	506.667	509.667	588	464.667	334						2	821.417	669.528	466.817	547.042	399.167						2	84.83	28.1318	90.6643	49.6743	86.7384
	2	789	680	839	597.667	644.333	644	524.333	398.333	484	437.333	517.333	405.667	283.667						3	760.5	619	416.05	476.667	346.167						3	80.5321	26.2716	88.3675	53.2687	86.267
	3	710	590.667	736	515.667	570.667	559.667	430.667	345.667	423.667	371.667	434.667	352.667	239.333						4	680.222	549.639	360.117	408.5	297.917						4	75.9719	29.1044	77.3584	45.4905	79.196
	4	625	515.333	641	437.333	500	480.333	357.667	293	361.667	324.667	376	304.667	205.333						5	592.25	472.056	306.45	353.333	257.208						5	73.9286	32.8733	63.5714	38.1838	70.2982
	5	551.667	407.667	548.333	350.667	423.333	409.333	294	242.667	310	284.333	334.667	265.667	180						6	508.083	397.528	260.517	313.125	225.083						6	75.8619	36.2094	50.2891	34.0001	61.0469
	6	484.667	351.333	464.333	288.333	357	340.667	241	207.667	255.333	263	303.333	237	162.333						7	435.389	331.361	222.633	285.792	201.208						7	74.3137	35.7872	37.2198	28.8146	52.1491
	7	430	291	395.333	237	300.667	283.333	200.667	176.667	211	251.333	283.333	212.667	152.667						8	375.889	277.306	192.867	268.667	184.292						8	70.3855	32.7747	25.4392	20.7418	41.5425
	8	382.333	254	341.333	200.333	257	242.333	174	154.667	173.667	250.333	263.333	192.333	152						9	328.278	235.583	171.2	258.958	174.708						9	65.788	28.5257	16.8644	8.0728	27.9896
	9	341	223.667	303	176.333	217.667	212.667	154.333	131.667	147.333	261	248.667	180.667	163						10	293.222	207.417	158.2	258.292	173.958						10	60.6556	23.1374	17.0243	10.5477	9.48702
	10	320.667	207	278	171	204	201	144.667	124	134.667	290.667	242.667	169	191						11	276.861	200.528	156.85	271.292	183.167						11	56.8766	18.9704	26.1978	34.5893	15.4385
	11	332.333	226.333	284.667	197	230.333	220.333	153	137.333	141.333	340.667	253.333	170.333	231.333						12	292.583	227.833	171.5	301.375	204.333						12	53.8579	17.441	37.0744	58.6309	42.1907
	12	394	289.333	335.333	273.333	312.667	276.667	181.333	170.667	176.667	399.333	290.333	188.333	283						13	352.389	298.361	205.933	347.542	238.75						13	54.1077	24.9099	44.0671	70.1803	64.2289
	13	514.333	398	435.667	397.667	452.667	357	230.333	234	255.333	449.333	357.667	226.333	339.333						14	464.444	418.528	265.217	405.917	284.583						14	61.0238	55.6375	43.0748	57.0399	75.0712
	14	703.333	563.333	592	600	681.333	463.667	314	350.667	395	487	456.667	285	389						15	632.944	592.556	351.717	471.833	336.875						15	71.4263	111.835	45.5592	16.1456	68.4126
	15	931.667	780.333	818	844.333	962	607	436.333	510.667	553.333	509.667	570.667	357.667	423.667						16	844.167	804.917	457.083	536.292	387.5						16	74.5438	172.589	78.3112	46.4923	43.0157
	16	1138	998	1075.33	1075	1221.33	791	583.333	676	722	507.333	678.667	428	435.333						17	1061.39	1021.08	564.717	589.333	428.583						17	69.1521	211.517	132.807	119.737	3.88909
	17	1293.67	1175.67	1314.67	1251	1433.67	980.333	734	805.667	863	494.333	768	489.667	431						18	1239.42	1201.92	654.117	625.458	455.625						18	77.4733	223.337	187.908	190.153	40.4819
	18	1379	1252.33	1462.33	1330.33	1558.33	1117	831.667	870	949	468	825	529.667	410.667						19	1344.31	1315.42	707.917	640.208	465.542						19	100.514	216.261	228.789	245.189	81.2584
	19	1391.33	1266	1503	1340	1581.33	1187.33	872.667	884	973.333	437	836.333	543	380						20	1364.36	1345.64	716.95	629.292	457.167						20	117.047	199.627	246.747	277.245	110.191
	20	1348	1181	1429	1250.33	1514	1160.33	843	801.333	926.667	391	803.667	524.667	346.333						21	1309.67	1297.61	683.733	594.083	433.417						21	121.358	182.834	240.23	285.671	123.037
	21	1254.33	1082	1303.33	1142.67	1393.67	1077	763.333	732.667	839.333	349.333	740.667	489.333	313						22	1205.03	1195.39	624.167	543.917	399.625						22	118.948	169.596	217.954	274.004	122.978
	22	1135	937.333	1150.67	990	1249.33	954	664.667	631.667	748.333	311	665.667	443	278.333						23	1080.5	1066.61	555.3	489.458	361.042						23	110.107	158.472	190.17	249.314	115.082
	23	1013	858.667	1008.67	875.667	1098	825.667	565.333	583.667	644	281.333	591	394.333	249						24	962.028	934.889	486.883	437.958	321.75						24	87.2513	144.279	162.277	219.498	103.473
	24	900	790.667	870	786.333	947.333	693	471	512.667	549.333	257.333	525	348	218						25	854.361	807.833	419.033	392.167	283.917						25	59.6556	128.558	134.591	188.68	92.7488
	25	785.333	707	758.333	658.667	803.667	579	391	398	461.333	239	461.333	307.667	188.333						26	749.611	683.444	352.117	351.042	249.417						26	47.2021	114.566	106.155	157.862	84.0279
	26	687.333	585.333	660.667	537.333	676.667	478	319	311.667	382.667	222.333	403	272	165.333						27	648.167	568.639	293.233	314.542	219.792						27	53.6292	102.008	81.803	128.163	75.8372
	27	601.667	473.667	585.333	430	569.667	398.667	260.667	247	321.667	212	353.333	242	145.667						28	559.361	472.833	247.083	284.375	195.583						28	64.4454	89.4932	63.9336	100.35	67.1751
	28	528	409.667	520	370.667	478.667	336	218.667	209.667	276.667	207.333	311.667	216.333	135.667						29	490.25	400.167	213.35	261.042	177.083						29	63.8931	75.5309	50.5028	74.3051	56.5685
	29	464.667	373.333	469	327	413.667	292.333	189	181.333	240.667	207.333	277.667	193.667	131.333						30	438.972	348.806	189.467	244.125	163.917						30	56.0541	63.4557	39.2397	50.0278	43.6049
	30	425.667	340.667	429.667	294.667	372.333	267.333	170.333	164.667	216	213	251	175.333	134						31	402.306	315.861	174.3	234.042	156.083						31	48.4746	55.913	29.9222	26.104	28.6378
	31	394.333	331	403.333	277.333	355.333	256	161.333	157.667	205.333	229	230.333	161	144						32	380.556	301.194	168.2	232.333	154.5						32	41.4407	53.5138	23.5661	1.76777	11.7851
	32	382	329.667	401.667	273.667	364.667	264.333	162	159.333	207	253.333	222.667	154	162.667						33	378.25	307.472	171.967	239.542	160.167						33	37.1322	56.4727	22.2991	19.8579	5.65685
	33	400.333	356.667	426.667	292	405.333	298.333	177	174	226	278.667	226.333	155.667	187.333						34	401.861	338.667	186.55	254.167	172.5						34	37.4779	66.6521	27.1487	34.8839	21.3311
	34	452.333	402.667	486.667	323.667	486.333	360	205	199.333	264.333	304.667	242.667	164.333	213						35	457.111	398.556	213.117	275.083	189.333						35	41.1986	85.1447	36.6756	39.8337	31.702
	35	537.667	495	585.667	393.333	601.333	452.333	254.333	255	324	325	276	183.333	233.667						36	545.028	486.556	251.7	299.958	208.5						36	45.784	107.208	51.0882	31.7609	33.7054
	36	632.667	615	714.333	478.333	732.667	563.667	319.667	320	391	335	315.333	207.667	249						37	653.444	593.25	297.367	324.917	227.708						37	51.8827	126.73	71.1681	11.1959	27.2825
	37	723.667	739	836.333	581	859.667	682	387.667	385.333	458	336.333	361.333	235	256.333						38	758.778	705	342.217	346.5	244.333						38	64.502	142.392	94.5982	17.9134	14.0243
	38	802.333	797	946	665.667	980.333	794	448.667	428.333	520	327.667	398.667	260	255.333						39	843.194	810.417	380.417	361	255.833						39	79.5225	154.355	118.119	49.9689	3.53553
	39	854.333	862.667	1011.67	762.667	1079.33	880.333	496.667	479	561	311	426.667	278.333	246.333						40	900.694	897.333	407.983	366.708	260.042						40	85.0061	157.73	138.794	79.0192	21.8614
	40	875	905.333	1025.33	825.667	1126.67	931	525.333	507.333	576.333	293.667	438.333	285.333	230.333						41	924.556	948.667	419.05	363.5	256.5						41	78.6785	153.593	151.844	99.9378	37.4767
	41	861.333	899.333	994	836.667	1128.33	930	519.333	494	561	273	433.333	283	213						42	910.917	955.778	412.05	351.125	246.417						42	67.0659	144.002	154.561	111.664	48.319
	42	816.667	874	925.333	832	1073.33	890.667	488	499	525	249	415.333	271	192.667						43	865.556	921.722	391.783	331.333	231.75						43	54.5641	127.556	149.348	114.551	54.3294
	43	753	807.667	839.333	776.333	983.333	814	441.667	461.333	480.333	230.333	385.333	255.667	175						44	795.889	852.333	360.633	307.208	214.5						44	42.9709	112.289	137.02	109.189	55.7436
	44	680.667	712.333	741.667	682.667	878	724	389.667	394.667	433.667	210.333	351.667	233.333	157.667						45	711.917	760.333	322.883	281.125	195.917						45	31.2104	102.427	120.06	99.1717	53.2687
	45	609.333	613.667	650.667	584	765	632	338.333	344.667	388	193	316.333	212	142.667						46	625.944	663.278	286.683	255.333	177.708						46	23.4811	92.8612	103.996	86.7384	48.9671
	46	533.667	528.333	567.333	505.667	661.667	545.333	296	313.333	342.667	179.667	282.333	192	129.333						47	546.889	572.611	255.833	231.208	161						47	19.9474	82.0611	90.8912	73.1266	44.0763
	47	472	464.333	494	428.333	568.667	468	260	289	304.667	165.667	250.667	172.667	118						48	480.167	490.056	229.983	209.042	146.083						48	15.2868	73.0793	80.6354	59.8094	38.5373
	48	416	420.667	435.333	351	484	403	228.667	268.333	274.667	156	221.667	156	110						49	426.167	415.778	207.567	190.333	133.792						49	10.9472	66.8452	71.378	47.494	32.7037
	49	371.333	378	390.333	288.333	412	348	200	238.333	245.667	149.333	201.667	143	104.667						50	381.75	351.889	188.017	176.375	124.333						50	9.27961	58.8561	62.2763	36.8285	27.2236
	50	335	343.667	351	248.333	338.667	301	178	226	222	146.667	184.667	132.333	101						51	345	299.25	172.083	168.125	117.625						51	8.17899	48.1354	53.7697	29.1682	21.5078
	51	308.333	310.333	322.333	211.667	291.333	263.667	163.667	202	199	147.333	184	123.667	103						52	315.389	258.861	159.183	164.083	114						52	8.54089	41.1183	44.7888	22.2739	14.6135
	52	289.667	278	305.333	185	259	241	148.333	180	188	152	166.667	117.667	107.667						53	295.694	232.361	150.633	161.417	113.333						53	12.3475	37.606	37.3577	12.3744	6.83537
	53	284.333	273.333	303.667	179.667	242	230	144	183.333	181.333	159.333	163.333	113.667	115.667						54	289.75	221.528	148.75	162.375	115.375						54	15.3204	34.9156	34.2003	3.94801	1.00173
	54	290.667	278.667	312	183.667	249.667	236.667	146.333	184	188	167.667	167.333	113.667	125.333						55	298.139	227.833	153.483	168.25	120.5						55	16.6563	35.3572	34.4764	0.707107	6.95322
	55	310	305.333	338.333	203.667	275.667	263	158.333	195.667	206.333	176.333	177	121.333	135.333						56	321.528	253.806	164.833	177.167	127.667						56	16.8014	40.128	38.9052	1.88562	9.78164
	56	339	355.667	375	242	334.667	314.333	177	224.667	234.667	183	192.667	126.667	142.333						57	359.25	301.889	181.667	187.667	134.917						57	18.4596	50.1266	47.788	8.48528	9.42809
	57	375.667	419.333	423	293.667	418.333	386.333	204.333	251.667	265	184.333	212.333	138.333	146.333						58	404.556	367.167	200.4	198.042	141.958						58	25.3394	66.9741	57.8002	19.9758	5.48008
	58	412	467.667	469.333	339.333	512.667	466.333	233	265	296	184	231.333	149	148.333						59	447.944	438.333	217.917	207.208	148.292						59	32.5739	88.0651	67.3304	33.8822	1.47314
	59	441.667	513.667	504	388	597	540	258.333	282	322.667	180.667	249.667	161	146						60	483.278	505.361	232.683	214.292	152.667						60	39.2987	105.686	76.7417	48.8493	10.6066
	60	457.667	547.667	526.333	436	663.667	596.333	272	301.667	338.667	173.667	264.667	169.667	140.333						61	505.194	559.111	242.333	217.375	154.292						61	45.3246	116.91	84.3648	62.9914	20.3293
	61	459.333	553	527.333	459.333	705.333	627.667	278.333	301	345.333	163.333	268.667	174.333	133						62	510.861	592.528	245.183	215.208	152.75						62	50.1814	121.723	88.857	73.1266	28.7557
	62	446.667	562	510.667	483	718.333	628.333	273.667	305.333	341	153.667	265.667	174	123.333						63	501.833	602.778	241.1	209	148.208						63	55.6687	116.89	89.7335	78.6067	35.2964
	63	422.667	542.333	478.667	483.667	692	606	257.667	293	321	143	258.333	170.333	113.333						64	479.889	589.417	230.65	199.5	141.375						64	60.7308	103.169	86.9198	79.9031	39.3034
	64	391.333	522	438.667	474	643.667	562.333	237.667	278	303	132.333	241.667	162	104.333						65	448.417	556.889	216.1	186.667	132.75						65	63.9548	85.157	81.9444	76.6032	40.6586
	65	358	482.667	392.667	450	583.333	507.667	215.333	261.667	274	122.333	221.667	151.667	94						66	411.222	511.944	199.05	172.458	123.125						66	64.8537	67.8046	75.453	70.1803	40.5997
	66	321.667	445.333	349	414.667	519.333	447.333	191	240.333	244	114.333	203.333	142	85.3333						67	373.028	461.417	181.283	159	113.958						67	64.3397	53.1998	68.0552	63.1682	39.7748
	67	290.333	409	311.667	386.667	458.667	388	167.667	225	219.667	106.333	186.333	132.667	78.6667						68	337.5	411.167	164.55	146.667	105.792						68	62.0085	42.6762	60.8119	56.3328	38.007
	68	263.333	368.667	280	343.333	404.333	338.333	148.667	200.667	195.333	100.333	170	123.333	73						69	304.472	362.694	148.65	135.583	98.3333						69	56.1314	36.7175	53.0961	49.1439	35.4732
	69	239.667	328	251	295.667	353	298.333	134.333	175.333	175	96.3333	155	114.333	68.3333						70	274.417	317.778	134.583	126	91.7917						70	48.2942	31.8824	45.7169	41.6014	32.3501
	70	220.333	294.333	229	260	308	265.333	121.667	163	158.667	93.3333	141.667	106.667	66						71	248.972	278.861	123.433	118.042	86.5833						71	40.473	27.4497	39.9138	34.5893	28.9914
	71	204.667	265	212	226.333	272.667	233.667	111	148.333	145.333	91.3333	131.667	100.667	64						72	229.194	246.722	115.067	111.958	82.875						72	33.7756	25.256	35.3887	27.9896	25.3969
	72	196	247.667	199.667	202	249	211	104.333	143.333	138	92.6667	122	95.3333	65.6667						73	216.278	222.833	110.3	107.875	80.875						73	30.0987	24.5052	32.7102	21.39	21.6257
	73	189.333	243.333	194.333	186.333	231.667	199.333	102	148	133	94.3333	116.333	93.3333	67						74	211.167	209.056	108.883	105.833	80.4167						74	30.4694	23.1721	32.0617	15.7921	18.1491
	74	190.667	250.667	195.333	187	227.667	197.333	100	149.667	133	97.3333	113.333	91	70.6667						75	213.194	207.028	109.783	105.958	81.4583						75	33.4085	21.1657	32.3623	11.7262	14.9082
	75	195.333	262	200.667	201	236.333	205.667	102	156.667	137	101.667	114	92.6667	75.3333						76	220.333	217.111	112.8	107.708	83.9583						76	36.6836	19.0894	33.1396	9.13346	12.9047
	76	205	275.667	210.667	226.667	255.667	225	106.333	159	145	104.333	115.333	96	78						77	232	238.25	117.983	110.333	87.125						77	39.8189	17.8612	35.0452	8.95669	12.9047
	77	218.333	298	227	262	287.667	251.667	115.333	173.333	157.667	105.667	122	100.333	80.6667						78	248.528	269.444	125.533	113.958	90.75						78	43.2191	18.9949	38.6463	11.9619	14.6135
	78	235.333	321	248	299.667	332.667	291	126.333	184	171.333	106.333	130.333	107.667	82.3333						79	267.306	308.778	133.9	118.25	94.75						79	45.9349	23.2763	42.5066	17.3241	17.9134
	79	249.667	339.333	266.667	338.667	387.667	331	136.667	191.667	182	105.667	139.333	114	83						80	285.694	353.472	141.35	122.125	98.25						80	48.1962	30.5685	45.8999	23.3934	22.156
	80	265	362.333	285.333	386.333	445.333	372	146.333	200.667	191.667	104.667	145.667	120	82						81	300.639	396.972	146.917	124.667	100.75						81	48.6343	40.0917	48.4962	28.9914	26.8701
	81	274	358.667	294	404.333	493.333	401.333	152.667	196.667	195.333	101.667	150	125	80						82	307.528	429.806	149.317	125.5	101.917						82	44.6852	50.1125	49.4123	33.8233	31.702
	82	275.667	351.333	297.333	419.667	518.333	418	155.667	193	194.333	98.3333	152	127.333	76						83	306.361	446.222	148.35	124.25	101.417						83	37.5357	57.5544	48.8426	37.3588	35.591
	83	274.333	330.333	296.333	403.667	520.667	419.333	155	180	190	93	148.667	126.667	73						84	300.667	447.056	145.183	120.833	99.7917						84	31.2638	58.704	47.4731	39.2444	38.3605
	84	267.667	326.333	287.667	413.667	499.333	408.333	151.667	183.667	177	88	145	127	68.6667						85	291.472	434.972	140.183	115.958	97.4167						85	28.0045	53.429	45.4312	39.7748	40.7765
	85	256.333	304	273	385.667	467.333	380.333	143.667	164.667	166.333	82.3333	137.667	124.333	64						86	277.861	408.778	132.833	110	93.9167						86	21.4102	48.2353	42.383	38.4195	42.3086
	86	258	271.333	256.667	347.667	423.667	346	135.333	150.333	158	78.6667	128.333	119.667	59.3333						87	259.389	373	124	103.25	89.5417						87	11.2905	43.6438	38.6385	35.3553	42.2496
	87	227.667	241	238.667	319	378.667	310.333	125.667	136	140	73.3333	118.667	114	56						88	237.889	334.556	114.983	96.25	84.8333						88	6.04746	38.3372	34.8169	31.702	41.0122
	88	212	219.667	222.333	273	334	274.333	116.333	129.667	128	70	109	107.667	52						89	217.972	295.667	106.783	89.625	80.2083						89	4.97098	34.4257	31.5583	27.6361	39.1855
	89	198	197.667	204.667	239.333	295	243	108	117.667	118.667	67	100	102.333	50						90	201.083	260.694	99.6167	83.875	75.9583						90	3.77584	30.7348	28.7422	23.2756	36.8285
	90	186	182.333	190	216.333	260.667	215.333	99.6667	113.333	109	65.6667	92.3333	95.6667	47.6667						91	186.222	231.194	93.25	78.9583	72.1667						91	4.0623	26.6987	26.0819	19.033	34.059
	91	173	167.333	177.333	187	231.667	193.667	93.3333	104	102	63.6667	85	91.3333	47						92	173.667	206.194	87.9833	74.875	69.25						92	5.22082	23.5988	23.5608	15.2617	31.2305
	92	164.333	156	170	171.667	209.333	176.333	88.3333	101	95.6667	63.3333	80.3333	87	47						93	163.861	186.694	83.95	72	67.25						93	6.37995	21.1789	21.3135	12.1387	28.52
	93	157.333	149	161.667	156.333	193.333	163.667	84	96	91.6667	63.3333	76.6667	84.3333	47.3333						94	157.028	172.778	81.2167	70.3333	66.1667						94	6.92637	20.0322	19.5402	9.54594	26.3987
	94	153	144.667	160.333	146.333	186	157	81.6667	93	92	64.3333	74.6667	83.6667	48.3333						95	153.306	164.722	79.7833	69.75	65.9583						95	7.38915	20.6328	18.3015	7.30677	24.8077
	95	152	144.333	159.333	142.667	185.667	156.333	79	95	89	66.3333	73.6667	82.3333	49.6667						96	153.111	163.444	79.5167	70.3333	66.1667						96	7.83703	22.741	17.6069	5.3033	23.3345
	96	154.333	148.333	165.333	143.333	196	163.333	82.6667	95	90.6667	69.3333	74.3333	82.3333	51						97	156.139	169.083	80.65	71.8333	67						97	8.28584	26.9865	17.4597	4.00694	22.2739
	97	158.667	153.333	170	150.667	215.333	173	83.3333	98.6667	95.3333	71	76.3333	84	53.3333						98	162	181.611	83.3	73.9583	68.75						98	8.33208	32.8338	18.0851	3.83016	22.0382
	98	164.333	167.333	180.333	166.333	242.667	189.667	88.3333	104	100.667	73.6667	79.6667	87	55						99	170.361	200.944	86.9	76.5	71						99	8.53682	38.8703	19.2909	4.71405	22.7453
	99	171	177.333	190	187.333	274	213.667	93.6667	107.667	105.333	74.3333	83.6667	90.3333	56.3333						100	179.278	224.417	90.85	79.0833	73.375						100	10.2172	44.502	20.6212	6.59966	24.1006
	100	177.333	183	202.333	211.667	305.667	227	101.333	108	114.333	75.3333	88	94	57.6667						101	187.75	248.917	94.3667	81.4167	75.5						101	12.1658	48.777	22.1149	9.07454	26.0451
	101	182.667	197.333	209.333	247.667	333.667	242	100.333	117.333	111.667	75	91.6667	97.3333	56.6667						102	195.444	272.028	96.3333	83.375	76.7917						102	13.5021	51.0146	23.3747	11.7262	28.461
	102	185.667	203	215.333	268.333	350.667	254.333	102.667	115	112.333	75	95.3333	99	55.6667						103	199.806	288	96.7333	84.875	77.3333						103	14.875	51.8497	23.8836	14.5546	30.7591
	103	185.667	196	218.667	274.333	354.667	257	104.333	111.333	111	73.3333	98.3333	101	54.3333						104	200.056	293.722	96.2833	85.5833	77.5833						104	16.4415	50.6949	24.0023	17.3241	33.1162
	104	184	193.667	218.333	280.333	345	254	102.667	110.333	108.667	71.6667	99.3333	103	52.3333						105	197.472	290.444	94.9	85.1667	77.3333						105	17.8281	47.0753	23.9363	19.4454	35.2375
	105	178.667	184.333	214.333	271	327	242.667	102	104.667	102.667	69	98.6667	102	50.6667						106	191.694	278.778	92.0833	83.7083	76						106	19.0774	42.5707	23.4299	20.4472	36.416
	106	171	171.667	207	255.333	302	227.333	96.3333	98.6667	98.3333	67.3333	96	100	47.3333						107	183.167	260.944	88.35	81.4583	74.0833						107	19.5773	37.5656	22.5021	20.2115	36.6517
	107	163.333	163.333	194.667	239.667	273	208.667	91.6667	95	91.6667	65	92.3333	98	47.3333						108	173.944	240.306	84.55	78.5833	72.25						108	18.0972	32.2094	21.3718	19.3276	36.2981
	108	154.333	157.667	183	225.333	242.667	188.333	86.6667	89.6667	86.6667	62.3333	88.3333	95.6667	44.3333						109	164.528	218.972	80.7167	75.25	70.125						109	16.043	27.9238	20.3866	18.0312	35.7678
	109	144.333	147.333	171.333	211	214.333	168.333	81	86.6667	81.3333	60.3333	83	92.3333	43.3333						110	154.278	197.361	76.6	71.875	67.625						110	15.222	24.881	19.3049	16.0867	34.825
	110	136	132.667	161.667	185	189	150.667	76	77.3333	76.6667	59	78.6667	88.6667	41						111	144.361	176.833	72.95	68.7917	65.0833						111	14.779	21.8079	18.3081	13.9654	33.5876
	111	129	128.667	151	173.667	168.333	137	71.6667	76.6667	81	57.3333	74.3333	85.6667	40						112	136.194	159.278	70.3333	65.9583	63.5						112	13.5622	19.093	17.7434	12.0797	32.9983
	112	122.333	120.667	143.667	152	152.333	124.333	68.3333	71.3333	70.3333	56	70.6667	87.3333	39.6667						113	129.583	144.306	67.6667	63.4583	62.2083						113	12.4936	16.5978	16.8683	10.312	31.9966
	113	117.667	117.667	137.667	141.333	139	115	64.3333	73.6667	68.3333	55.3333	67.3333	79	39						114	124.556	132.278	65.05	61.625	60.0833						114	11.5717	14.3859	15.635	8.54421	29.4628
	114	114.333	115	132.667	127.333	132.333	108.333	61.3333	69.3333	67	55.6667	65.3333	78.3333	39.3333						115	121.25	123.75	63.45	60.6667	58.8333						115	10.7532	12.6647	14.7382	6.95322	27.5772
	115	114	112.333	131.667	119.333	128.667	105.667	60.3333	69	67.3333	56.3333	64.3333	77.6667	39.6667						116	119.75	118.667	62.9167	60.25	58.8333						116	10.6187	11.9725	14.1114	5.42115	26.3987
	116	114	113	132	114	130	104.667	59.3333	69.6667	67.6667	57.3333	62.3333	76.3333	42						117	119.806	117.194	63.0833	60.125	59.0833						117	10.8782	12.9017	13.6407	4.30157	25.2201
	117	115.333	112.667	133.667	112.333	135.667	107.333	60	69.3333	69.6667	57.3333	63.6667	77.3333	41.3333						118	121.417	119.889	63.85	60.4583	59.4583						118	11.1252	15.0255	13.7856	3.71231	25.1612
	118	117.333	119.667	137.667	121.333	145.667	112.333	62	73.6667	71	59.3333	62.6667	78	42						119	125.861	127.639	65.7167	61.25	60.4167						119	10.4258	17.2487	14.5957	3.06413	25.8094
	119	121.667	136	141.667	140	159	118.667	63	83.3333	72.3333	60.3333	64.6667	81.3333	43.3333						120	131.333	138.75	67.95	62.7083	61.8333						120	10.0627	20.1672	15.5552	2.88735	26.3987
	120	126	130.667	146	153	172.333	125	65	81	74.3333	62.6667	67	81.3333	44						121	135.056	150.25	69.3167	64.5417	62.7917						121	10.1572	23.7594	15.6799	3.35876	26.5754
	121	130.667	134.667	150.667	168.333	185	131.333	67.6667	81	76	63	69	82.3333	44.6667						122	138.278	161.194	70.3167	66.0417	63.5						122	11.0872	27.3092	15.6211	4.41942	26.8701
	122	132	136.667	156	184	194.333	136.333	69.3333	82.6667	76.6667	63	71.6667	84	44.6667						123	141.167	170.389	71.4	67.4167	64.3333						123	12.1324	30.6035	15.9724	5.89256	27.8129
	123	134.667	136.667	157.333	193.667	198.667	138.333	72	82.6667	76.6667	64	74	85.6667	44.6667						124	142.472	176.111	72.25	68.4167	64.875						124	12.851	33.1686	16.5039	6.83537	28.8146
	124	134.333	135	158.333	199.667	199	138.667	72	87	75.6667	63.3333	73.3333	85.6667	44						125	142.75	178.167	72.4833	68.5417	65.0417						125	13.0817	35.3014	17.0519	7.3657	29.7574
	125	134.667	137	157.333	204.667	194	134	71	83.3333	74.3333	62.6667	74.3333	87.3333	43.3333						126	141.972	176.306	71.8	68.1667	64.9583						126	12.8112	37.0267	17.2219	8.13173	30.8181
	126	132.333	131.667	154	200.333	183.667	129	69.6667	79.6667	75	61	73.6667	86.6667	42						127	139.056	169.889	70.5833	67.5	64.4583						127	12.3719	36.8405	17.2616	9.07454	31.7609
	127	130	125.667	148	187.667	171.333	121	67.6667	78.3333	72.6667	59.6667	74	87	40.6667						128	134.333	159.75	69.05	66.5	63.5833						128	12.3314	34.7078	17.3325	9.78164	32.4091
	128	126	117.333	143.333	174.333	157.333	112.333	65.6667	75	70	58	72	85.3333	39.3333						129	128.944	147.917	67	65.0833	62.375						129	12.5112	31.8316	17.1415	10.1352	32.5858
	129	123	111.667	135.667	159.333	143.667	104	63.6667	71	66.3333	56	71	84	38						130	122.917	135.222	64.6167	63.4167	60.9167						130	12.7184	28.0748	16.6472	10.1352	32.1734
	130	117.333	101.333	129	139.667	129.667	95.3333	61.3333	67	64	55	68.3333	81.3333	37.3333						131	116.722	122.833	63.0167	61.75	59.5						131	12.8594	24.2596	16.1604	9.54594	31.4663
	131	113	99.3333	122.667	130.667	119	88	68.6667	68.3333	61.6667	54	66.3333	80.3333	36.3333						132	111.389	112.75	61.7333	60	58.125						132	12.4478	21.7988	15.8758	8.60313	30.8181
	132	110	92.3333	116.667	119	112.333	81.6667	56	64.6667	59.3333	52.6667	63.3333	77.6667	35.3333						133	106.611	104.083	59.5333	58.0833	56.9167						133	12.3773	19.5597	15.2053	7.54247	29.5806
	133	106.667	87.6667	112	107	102	76.3333	54.6667	64.3333	57.6667	51.6667	60.6667	75.6667	37						134	102.694	96	57.6333	56.2917	55.8333						134	12.4235	16.786	14.5136	6.42289	28.0486
	134	103.667	87.3333	109.667	99.3333	96	73	53.3333	62.6667	56.6667	51	58.6667	73.6667	34.6667						135	100.139	90.1111	56.7	54.9583	54.5833						135	12.2365	14.4636	14.1718	5.36223	27.3415
	135	102.333	83.3333	108.333	94	93.6667	71.6667	55.6667	62.6667	57	51	57	72.6667	34.6667						136	98.0556	86.4722	56.2	54.3333	53.6667						136	12.6385	12.9696	13.9362	4.24264	26.7522
	136	101	81.3333	105.667	89.6667	91.3333	69.6667	52	63.3333	56	52.3333	56.6667	71.3333	35						137	96.6389	84.3333	55.7333	54.0417	53.2917						137	13.3607	11.8025	13.5241	3.0052	25.7505
	137	100.667	80.3333	108.667	87.3333	92	72	52	61.3333	57	52	54.3333	70.6667	35.6667						138	96.3611	84.3056	55.6833	53.7083	53.2917						138	13.6444	11.2473	13.1887	2.18025	24.9255
	138	100.333	82.3333	106.333	91	95	72.3333	53	65	57.3333	52.3333	55.6667	71	36.3333						139	96.8889	86.3056	56.3667	53.7083	53.5417						139	12.9798	11.9729	13.0356	1.94454	24.3363
	139	101.667	84.6667	108.667	95.3333	98.3333	74	55	65.3333	57.6667	52.6667	54.6667	70.3333	37						140	98.1111	89.3889	57.1	54	53.8333						140	12.5278	13.211	12.8905	1.53206	23.8059
	140	103.333	85	110	99.6667	102.667	76.6667	55	66	59	54	55.3333	71	37.6667						141	99.6667	93.1111	57.7333	54.5833	54.3333						141	13.1395	14.033	12.7807	0.824958	23.6881
	141	105	85.6667	113.667	104	107	80.6667	57	65.3333	59.6667	55.3333	55.3333	72	38						142	101.25	97.1667	58.3833	56.375	55						142	13.9174	15.0501	12.9091	0.766032	24.1595
	142	105.667	87.3333	115	111.333	111	81.3333	56.6667	66.3333	60.6667	63	57.3333	73.3333	38						143	102.75	101.167	59	58.0417	55.5						143	13.9933	16.9609	13.2942	1.82669	24.8666
	143	106.667	89.6667	116.333	118	114	83	57.3333	68.3333	61	56	57	73.6667	37.6667						144	104.472	104.944	59.5833	57.7083	55.7917						144	13.3755	19.2344	13.8406	0.0589256	25.7505
	144	107.333	94	119	126.333	115	84.3333	58.6667	68.3333	61.3333	56	59.3333	75.3333	37						145	106.167	107.917	59.9333	57.375	56.0833						145	12.9561	21.5382	14.3348	2.18025	26.8701
	145	108	93	119.667	130.667	114.333	83.6667	58.6667	67.3333	60.6667	55.3333	60	76	36.6667						146	106.972	109.056	60.1167	58.2083	56.375						146	12.8594	23.4512	14.5203	2.2981	27.4004
	146	108.333	94.6667	119	131.333	111.667	82.6667	59.3333	69	61.3333	59.6667	60	75.6667	37.6667						147	106.972	108.222	60.2333	58.8333	56.4167						147	12.7504	24.5482	14.5983	1.88562	27.4593
	147	108	92.3333	118.667	130.333	108.667	79.6667	58.3333	68.3333	60.6667	55.3333	60.6667	76	36						148	105.806	105.472	59.9167	58.2917	56.25						148	13.0747	24.5694	14.8896	3.0052	28.1664
	148	105.333	88.6667	115.667	122.333	103.667	76.6667	58	66	60	54.3333	60.3333	77	35.6667						149	103.389	100.778	58.9833	57.125	55.7083						149	13.8083	22.7215	14.8447	3.94801	28.461
	149	104	84.6667	113.667	112.667	98.6667	74	57	63.3333	58.3333	53.3333	58.3333	73.3333	35						150	102.778	99.3333	58.5	56.75	55.1667						150	14.0915	21.8719	14.5726	3.77124	27.9307

## Sheet: SFig7_A_Technical_Replicates
Biological Replicate 1:	swd2_T1	swd2_T2	swd2_T3	Swd-2 Period Calls:		sdc1_T1	sdc1_T2	sdc1_T3	Sdc-1 Period Calls		swd3_T1	swd3_T2	swd3_T3	Swd3 Period call		set1_T1	set1_T2	set1_T3	set1 period call		WT_T1	WT_T2	WT_T3	WT period call		Biological Replicate 2:			swd2_T1	swd2_T2	swd2_T3	swd2 period call		sdc1_T1	sdc1_T2	sdc1_T3	sdc1 period call		WT_T1	WT_T2	WT_T3	WT Period call		Biological Replicate 3:			sdc1_T1	sdc1_T2	sdc1_T3
	792	947	933	21.2553		770	668	728	21.956		981	923	966	23.2326		960	1182	1170	23.7857		437	601	586	21.0316					761	725	812	21.2553		699	700	599	22.4494		499	473	481	22.9655					847	778	596
	751	883	872	21.7174		724	624	680	21.956		897	847	868	22.7045		891	1065	1065	23.2326		415	571	534	21.4839					735	687	787	21.956		668	690	573	21.7174		434	454	440	21.7174					790	729	552
	722	820	825	21.956		677	583	673	21.7174		819	793	798	22.9655		815	973	964	23.5059		392	539	521	21.956					692	633	715	21.7174		619	638	536	22.2		381	420	394	21.956					724	686	522
	652	735	743			586	519	607			717	699	708			714	835	828			346	471	454						605	544	623			544	553	450			325	374	338						614	605	460
	566	651	658			503	471	526			605	598	611			603	688	698			297	398	390						533	474	539			463	466	383			270	322	287						516	529	396
	498	575	582			432	389	449			514	513	519			514	577	590			254	342	334						431	370	422			376	372	304			225	267	236						429	462	337
	438	506	510			364	327	380			437	429	426			433	493	499			214	280	272						368	328	358			317	301	247			190	234	199						354	389	279
	389	447	454			307	279	316			375	349	333			368	427	426			180	229	224						302	274	297			261	245	205			167	198	165						292	333	225
	344	399	404			273	236	262			326	275	267			316	369	373			148	187	186						262	242	258			224	207	170			149	174	141						247	292	188
	303	362	358			220	208	225			288	221	219			276	328	332			127	154	161						228	215	228			197	181	151			133	146	116						216	264	158
	281	342	339			205	197	210			267	188	187			250	306	304			114	136	154						205	196	220			189	174	150			128	134	110						205	255	143
	285	358	354			234	218	239			275	180	180			239	313	308			115	137	172						212	214	253			217	196	178			148	141	123						231	281	149
	324	434	424			314	293	331			321	209	209			266	365	357			135	168	227						259	272	337			302	266	252			194	168	150						301	350	179
	406	574	563			447	428	483			413	283	287			354	470	475			189	240	337						343	370	481			456	369	368			266	225	211						408	434	229
	533	793	784			678	663	703			564	428	431			495	625	669			293	366	526						479	514	697			713	543	544			395	334	323						556	523	312
	692	1062	1041			977	960	949			785	665	654			723	825	949			421	518	721						669	724	948			1007	769	757			567	491	474						769	613	439
	859	1294	1261			1250	1217	1197			1075	978	938			986	1070	1278			564	666	936						848	964	1182			1268	999	958			739	674	615						1024	733	616
	990	1466	1425			1481	1412	1408			1352	1299	1254			1235	1357	1610			690	797	1102						1021	1147	1359			1438	1194	1121			885	808	724						1252	894	795
	1060	1557	1520			1616	1511	1548			1609	1600	1550			1450	1627	1886			789	876	1182						1127	1202	1428			1503	1285	1203			944	890	776						1397	1031	923
	1083	1561	1530			1636	1519	1589			1808	1824	1771			1591	1841	2090			829	902	1189						1167	1221	1410			1502	1307	1211			954	918	780						1435	1144	983
	1054	1502	1488			1565	1444	1533			1923	1934	1882			1672	1978	2189			809	864	1107						1098	1137	1308			1400	1240	1111			860	838	706						1354	1169	958
	994	1395	1374			1440	1313	1428			1934	1915	1879			1661	2004	2181			738	795	985						1020	1044	1182			1275	1140	1013			774	765	659						1215	1129	887
	900	1257	1248			1281	1171	1296			1824	1788	1745			1592	1913	2036			663	718	864						891	894	1027			1115	983	872			672	654	569						1050	1023	789
	810	1116	1113			1115	1023	1156			1654	1571	1528			1449	1736	1827			578	636	718						821	836	919			983	877	767			621	599	531						887	903	687
	717	995	988			962	880	1000			1429	1340	1286			1253	1521	1569			501	547	600						752	772	848			886	793	680			551	511	476						722	777	580
	626	860	870			815	747	849			1209	1095	1032			1062	1294	1305			422	471	491						650	698	773			748	679	549			428	392	374						586	670	481
	551	746	765			680	629	721			980	856	793			855	1061	1041			349	396	403						544	572	640			615	554	443			331	305	299						475	563	396
	492	646	667			574	530	605			779	663	624			678	853	832			289	338	338						447	449	525			496	434	360			266	236	239						399	472	325
	438	567	579			483	447	506			636	534	502			552	683	673			241	295	294						387	390	452			425	378	309			226	193	210						339	405	264
	392	502	500			415	391	435			522	442	415			459	562	557			206	255	261						358	353	409			374	338	269			191	166	187						296	356	225
	362	454	461			376	360	381			437	375	347			391	478	475			182	224	242						327	308	387			335	305	244			170	152	172						269	327	206
	344	438	401			359	350	357			386	332	305			342	424	415			172	209	235						318	294	381			317	288	227			157	147	169						260	314	194
	333	426	387			370	365	359			352	311	284			314	383	380			171	207	243						316	289	384			311	287	223			155	150	173						268	322	203
	341	453	407			409	413	394			337	308	278			297	364	361			186	222	270						335	314	421			334	307	235			166	166	190						298	363	234
	370	515	472			486	504	469			343	325	293			293	361	363			215	258	320						385	345	478			377	339	255			189	192	217						359	436	285
	425	609	579			601	630	573			354	360	328			306	373	394			261	320	391						460	436	589			460	412	308			246	247	272						444	552	361
	499	711	688			733	774	691			391	420	382			337	408	446			312	381	480						560	558	727			567	498	370			316	313	331						554	692	445
	574	813	784			866	899	814			442	511	469			400	461	529			366	443	565						657	694	866			683	611	449			385	384	387						675	829	542
	648	902	857			989	1009	943			518	630	584			471	523	638			419	495	646						729	722	940			778	692	527			430	433	422						800	952	630
	693	961	909			1072	1096	1070			606	766	717			564	599	760			457	524	702						792	770	1026			881	786	621			482	498	457						894	1049	698
	724	975	926			1114	1124	1142			707	909	852			664	688	876			477	530	722						826	825	1065			951	854	672			520	531	471						942	1111	740
	727	950	907			1111	1111	1163			825	1029	973			765	801	997			469	503	711						820	825	1053			964	870	676			506	523	453						927	1126	737
	695	896	859			1054	1051	1115			943	1120	1072			853	908	1108			445	462	668						802	814	1006			951	870	675			514	529	454						866	1098	708
	652	816	791			961	959	1030			1036	1178	1138			921	1005	1199			413	418	610						754	739	930			891	808	630			478	488	418						786	1013	643
	594	732	716			860	849	925			1083	1182	1162			954	1062	1236			374	384	543						659	651	827			794	710	544			407	418	359						688	910	574
	533	652	643			751	740	804			1077	1147	1131			954	1077	1226			336	353	475						567	567	707			685	613	454			358	363	313						592	805	499
	470	562	569			646	640	699			1026	1064	1046			908	1040	1167			296	327	405						490	488	607			592	535	390			325	331	284						506	696	434
	415	495	506			555	554	597			937	956	927			834	953	1055			260	301	353						432	432	529			496	457	332			296	305	266						431	600	373
	365	436	447			474	470	508			829	831	792			744	858	926			235	279	310						392	394	476			402	386	265			276	281	248						373	522	314
	324	390	400			403	404	429			718	704	657			645	744	797			206	259	272						348	357	429			324	325	216			240	251	224						322	455	267
	291	351	363			335	336	345			607	581	522			546	636	670			189	243	234						314	326	391			272	277	196			224	241	213						277	403	223
	269	321	335			283	281	310			515	478	417			454	535	552			171	225	201						282	295	354			229	232	174			195	217	194						242	357	192
	250	302	317			248	248	281			441	396	340			376	448	454			164	216	184						252	266	316			199	201	155			167	196	177						219	331	173
	246	296	311			232	231	263			383	332	286			315	380	377			158	209	177						252	258	310			189	192	158			162	203	185						207	316	167
	249	303	320			247	235	267			336	287	252			270	329	321			163	214	187						256	266	314			193	197	161			165	202	185						210	321	179
	262	326	342			268	261	298			299	256	231			235	296	286			181	225	213						278	296	342			214	217	180			177	212	198						239	342	208
	282	361	374			329	315	360			273	242	223			211	277	264			203	243	258						318	347	402			249	259	218			210	239	225						292	394	257
	306	404	417			411	390	454			260	242	230			199	277	258			231	261	303						365	410	483			299	317	265			244	266	245						368	472	319
	331	449	456			500	477	561			262	260	251			198	290	267			258	282	348						401	456	546			353	364	301			265	279	251						460	560	379
	357	486	482			572	552	667			278	292	284			210	318	290			280	300	388						439	498	604			402	420	342			285	299	262						539	652	429
	372	505	496			625	605	761			307	344	331			234	356	320			293	309	414						471	525	647			453	471	384			310	322	273						591	736	462
	377	507	494			655	640	821			357	408	390			264	405	360			297	309	430						476	524	659			484	495	399			312	327	264						619	783	481
	377	489	474			659	645	851			412	479	455			301	459	402			290	305	428						482	537	667			511	519	419			319	335	262						614	792	479
	364	461	443			630	615	831			476	552	527			343	512	454			274	281	408						468	513	646			518	517	416			305	315	259						586	770	462
	343	425	406			583	568	780			531	626	592			389	567	499			264	262	383						452	496	618			512	507	403			297	304	233						535	721	431
	321	386	367			530	511	709			584	682	650			438	619	549			236	240	346						416	458	574			487	486	377			283	284	218						473	658	392
	292	345	328			475	456	627			636	716	692			483	658	595			213	215	304						383	423	530			457	440	347			261	261	199						415	581	346
	267	310	294			425	403	548			656	726	714			515	684	631			195	193	271						353	387	487			430	405	325			248	242	185						359	507	298
	244	280	266			378	359	476			657	718	708			529	691	640			172	173	241						318	345	443			386	361	283			224	213	165						313	443	259
	223	253	243			332	320	407			638	686	678			524	676	620			154	155	216						284	305	395			337	311	239			196	185	145						274	391	230
	204	234	223			296	284	344			596	638	627			503	637	591			138	140	198						256	272	355			299	279	202			187	169	133						242	349	205
	188	218	208			268	257	293			548	584	568			460	584	550			125	125	186						231	244	320			259	246	174			171	151	123						213	306	182
	178	210	200			250	243	254			497	524	498			420	525	501			116	118	180						215	228	300			230	219	157			167	145	118						193	275	165
	169	204	195			240	232	223			439	458	425			371	464	448			112	112	175						212	224	294			209	195	155			174	147	123						180	260	158
	171	203	198			241	237	205			390	399	358			322	402	397			110	111	178						215	232	305			208	191	162			177	147	125						178	259	155
	171	210	205			257	249	203			341	346	299			270	357	350			113	112	186						220	248	318			224	205	174			188	152	130						188	269	160
	178	223	214			283	270	214			305	306	255			230	314	315			118	118	199						227	261	339			251	229	200			188	155	134						207	292	176
	187	236	232			313	305	245			279	270	224			199	289	286			129	127	217						241	288	365			282	265	239			206	169	145						240	324	191
	201	256	249			356	348	294			278	249	200			178	273	260			137	138	239						258	310	395			320	303	276			221	180	151						282	369	222
	214	271	264			402	396	365			253	265	187			165	261	246			145	146	255						270	328	420			359	351	306			231	189	155						328	409	256
	229	288	278			454	441	441			248	226	184			162	258	247			152	155	268						290	350	447			406	408	345			240	202	160						370	454	292
	237	299	286			499	471	510			242	232	223			171	259	256			154	162	270						284	349	443			433	425	355			236	198	156						398	487	319
	245	299	283			516	482	557			239	247	208			183	271	270			155	162	266						279	339	436			450	444	365			232	196	151						409	511	334
	245	299	279			509	472	581			248	274	237			203	289	294			149	157	264						265	317	409			440	427	344			217	182	141						402	519	337
	244	290	269			482	445	571			251	304	272			222	310	329			141	152	238						265	312	402			451	438	352			222	185	144						388	512	325
	236	278	255			450	409	543			259	342	309			242	329	366			132	144	223						249	290	373			428	407	322			196	165	133						358	487	296
	276	261	237			405	369	497			267	376	346			258	351	406			137	135	202						224	259	331			391	367	285			180	149	122						320	450	268
	216	246	221			361	329	446			278	403	374			278	372	440			110	127	183						202	228	293			391	321	245			162	133	113						287	407	237
	203	226	207			318	289	395			303	423	397			296	392	463			100	118	166						189	207	263			316	288	215			156	125	108						249	365	209
	190	211	193			279	255	351			333	433	406			314	402	470			93	111	152						170	185	238			279	254	185			141	112	100						221	325	183
	179	198	181			248	228	306			351	429	409			323	398	471			84	103	140						158	171	218			254	230	165			137	106	97						194	293	159
	166	185	168			222	206	267			356	422	399			326	392	460			78	97	131						146	157	199			222	199	140			125	95	92						173	266	142
	158	175	160			202	190	236			346	409	385			319	378	441			73	91	123						136	146	186			200	186	129			123	91	89						159	240	130
	151	168	153			191	178	211			328	392	362			308	354	410			69	87	119						131	139	177			182	167	120			116	85	87						149	222	120
	146	163	150			187	175	196			301	373	338			285	328	382			73	85	118						125	135	174			170	156	113			113	81	85						143	212	116
	144	161	151			189	178	190			273	351	313			263	302	348			68	83	116						123	136	174			164	154	110			115	82	88						142	209	118
	144	165	154			202	187	199			246	334	291			239	277	321			68	86	118						126	138	181			165	154	111			115	82	88						151	213	126
	146	171	159			221	206	219			223	312	265			218	248	296			72	88	126						128	143	189			176	162	114			120	86	90						161	222	136
	151	177	165			246	229	253			204	296	243			200	226	278			76	92	134						139	159	204			197	182	120			126	91	95						176	240	153
	156	185	172			273	250	299			189	283	226			180	211	261			80	95	141						146	168	218			220	212	130			128	98	97						193	276	172
	161	193	178			297	272	348			175	276	211			163	199	252			98	99	146						150	174	225			246	243	146			126	100	98						210	281	190
	166	199	183			316	285	400			167	264	204			153	196	244			87	101	147						164	188	240			281	286	176			137	111	104						222	299	205
	169	202	186			324	291	437			162	263	204			147	196	241			88	101	148						171	193	245			302	306	197			131	112	102						231	313	219
	170	203	184			321	287	456			168	268	209			142	199	242			87	101	145						165	187	236			304	309	210			125	110	99						234	317	220
	169	202	181			307	275	453			177	275	219			141	205	249			85	98	143						167	184	230			309	311	221			124	109	98						229	314	219
	165	197	174			287	254	440			198	286	238			144	216	255			82	94	132						161	175	217			300	296	217			116	105	93						216	305	207
	158	187	168			263	235	408			221	302	260			148	230	263			79	91	125						151	164	200			283	276	207			110	99	87						203	288	191
	152	178	160			237	212	370			248	316	285			155	249	273			73	85	117						148	154	188			266	257	196			106	94	85						184	271	171
	143	169	151			211	188	329			274	326	307			167	266	286			70	81	109						142	152	179			252	239	185			99	88	82						166	248	151
	135	158	140			188	166	289			294	327	323			180	284	296			65	77	102						134	140	168			238	222	173			96	85	79						149	224	132
	127	149	132			168	149	250			315	331	334			195	297	306			62	72	96						121	125	152			214	194	147			86	75	71						133	203	116
	119	142	126			151	135	219			330	333	333			205	303	309			59	92	92						118	121	147			203	181	137			86	74	70						122	186	103
	112	134	121			139	123	195			339	332	323			212	307	308			56	66	89						110	114	138			180	159	117			80	68	66						110	170	93
	106	130	117			129	116	172			332	326	313			213	306	298			55	63	87						107	111	135			170	148	106			83	70	68						102	157	86
	104	125	114			123	112	162			318	319	303			210	298	287			54	61	86						105	109	131			155	135	92			79	65	64						95	148	82
	103	124	115			123	111	152			294	306	288			203	283	269			54	61	87						103	105	129			147	127	84			78	64	65						92	144	81
	103	124	115			126	114	150			270	293	278			192	263	252			54	62	87						103	106	130			140	124	78			80	64	65						92	141	81
	103	126	117			131	120	156			247	276	263			182	239	236			55	64	90						101	106	131			136	123	78			80	64	64						94	142	86
	104	128	120			142	128	167			220	256	252			168	213	221			56	65	92						108	112	139			142	135	87			85	68	68						97	147	93
	108	132	125			152	139	186			199	240	241			161	193	213			57	67	93						124	123	161			159	156	105			97	78	75						102	154	100
	111	138	129			164	148	205			179	226	229			152	174	201			59	69	95						117	122	153			165	173	121			92	78	73						107	161	107
	114	144	134			172	159	224			163	217	217			148	162	195			60	72	96						122	126	156			178	186	141			92	79	72						111	169	114
	117	145	134			176	165	242			153	214	209			141	149	192			62	73	95						125	128	157			191	201	160			94	80	74						115	175	119
	120	148	136			177	166	253			144	237	205			137	142	194			62	74	94						126	128	156			199	210	172			93	82	73						116	178	121
	120	148	135			174	163	260			139	227	203			134	138	201			61	75	91						124	127	154			204	214	181			107	82	72						114	180	122
	122	148	134			168	158	256			138	241	205			139	139	214			61	73	89						126	129	156			210	218	186			94	83	73						109	176	117
	121	145	131			158	148	245			142	253	209			143	143	230			65	73	87						123	123	149			206	213	182			89	80	70						106	170	111
	119	143	128			146	140	228			148	265	217			154	150	249			64	71	83						118	118	141			196	199	168			90	77	68						97	162	104
	116	138	124			135	127	210			153	273	227			170	159	266			60	69	81						110	110	132			183	183	157			86	74	65						90	152	95
	115	134	120			123	118	190			159	280	242			175	169	282			55	67	77						106	104	125			170	166	142			81	69	63						84	142	86
	110	127	115			112	107	170			172	284	255			187	181	293			53	64	75						95	94	115			151	145	123			78	64	59						77	131	78
	106	122	111			105	99	153			187	285	265			199	194	302			51	62	72						95	92	111			143	134	115			81	64	60						71	122	71
	102	120	108			107	92	138			208	284	269			206	205	305			49	59	70						87	85	105			130	122	105			76	61	57						67	113	65
	100	115	105			92	88	126			231	277	268			208	214	304			47	58	68						83	79	101			119	110	92			78	59	56						62	107	60
	96	112	103			88	83	117			248	271	259			206	221	299			46	56	68						83	79	100			112	101	85			75	57	56						60	102	57
	95	110	102			87	83	111			259	262	249			204	222	287			47	55	69						78	75	97			106	97	79			76	57	55						59	99	57
	94	109	100			85	82	107			260	255	238			196	221	270			45	55	68						75	72	97			100	94	75			76	56	58						57	96	56
	93	108	101			86	83	107			249	248	225			186	211	251			45	55	71						74	71	96			98	92	72			74	55	55						63	97	56
	91	109	101			90	86	109			235	238	214			174	201	233			45	55	72						75	74	98			101	97	75			78	59	58						61	98	58
	92	110	103			92	90	113			217	229	204			162	185	213			45	56	72						77	77	100			102	103	81			79	59	58						61	100	61
	94	112	104			95	93	120			200	219	195			149	167	194			46	58	73						77	77	101			105	107	87			79	61	58						63	103	64
	95	114	106			98	96	127			183	211	188			138	155	182			46	58	75						77	78	102			108	112	92			78	60	58						67	107	68
	95	114	108			100	99	134			168	205	181			129	140	170			47	60	75						79	80	103			113	120	101			79	61	59						67	108	69
	96	116	108			103	100	139			156	200	178			123	127	164			47	60	76						81	83	105			119	125	110			80	63	62						68	111	70
	96	117	109			102	101	142			147	197	177			119	122	158			47	61	76						86	87	109			128	132	119			79	65	61						69	113	71
	97	117	110			101	100	142			137	193	178			113	117	159			47	60	75						84	86	109			134	135	123			78	65	59						69	112	70
	98	118	109			98	97	140			133	192	179			112	115	160			48	61	75						86	88	110			138	132	124			79	67	61						68	111	69
	98	117	109			96	95	135			130	190	186			112	113	163			48	61	73						84	84	109			137	131	123			79	67	59						65	109	65
	95	115	106			92	90	129			134	190	194			113	116	170			48	59	73						80	80	106			131	122	114			76	64	58						62	106	62
	93	115	104			87	86	123			137	195	203			114	122	174			46	58	71						77	77	100			123	111	104			73	62	55						61	101	60
[truncated: 34 more columns]

## Sheet: SFig7_A_Period
Period Calls (Traces from Panel A)		swd2	sdc1	WT	swd1	WT_swd1			Average	St Dev
Each Biological replicate is an average of three technical replicates	Rep 1	21.6429	21.8765	21.4905	22.1351	22.1187		swd2	21.2712	0.525635
WT_swd1 is the WT that was on the plate with the swd_1 runs (these were done seperately from swd2 and sdc1)	Rep 2	21.6429	22.1223	22.213	21.7226	22.3229		sdc1	21.6043	0.567731
	Rep 3	20.5279	20.814	21.1997				WT	21.6344	0.425999
								swd1	21.9289	0.206282
								WT_swd1	22.2208	0.102106
Period Calls All technical replicates:
	Swd-1	Swd-2	Swd-3	Sdc-1	Set-1	WT	WT_swd1			Avg Period (Mean using excel)
	21.956	21.2553	23.2326	21.956	23.7857	21.0316	21.956		swd2	21.2712	These are reported in the table of Panel A (WT not reported)
	21.4839	21.7174	22.7045	21.956	23.2326	21.4839	22.2		sdc-1	21.6043
	22.9655	21.956	22.9655	21.7174	23.5059	21.956	22.2		swd1	21.9289
	22.2	21.2553	24.975	22.4494	24.0723	22.9655	22.7045		swd3	24.024
	21.4839	21.956	25.2911	21.7174	23.5059	21.7174	21.0316		set1	23.9178
	21.4839	21.7174	24.975	22.2	24.0723	21.956	23.2326		WT_all	21.869
		20.5979		20.8125	24.0723	21.956
		20.3878		21.0316	23.7857	21.2553
		20.5979		20.5979	23.7857	20.3878

## Sheet: SFig7_B_Traces
Biological Replicates	TPs	set1_Rep1	set1_Rep2	set1_Rep3	swd3_Rep1	swd3_Rep2	swd3_Rep3	swd3_Rep4	set1swd3_Rep3	set1swd3_Rep4	WT_Rep1	WT_Rep2	WT_Rep3	WT_Rep4		Smoothed Average:			Time Points	set1_avg	swd3_avg	set2swd3_avg	WT_avg			Standard Deviation:			Time Point	set1_stdev	swd3_stdev	set1swd3_stdev	WT_stdev				Plots in Figures S7 are of the smoothed average plus/minus the standard deviation
Each replicate is an average of three technical replicates	0	1104	915	6	956.667	525	821.5	652	1276	529	541.333	484.333	399.667	507		This was calculated using an R code that smoothes by averaging time point n with the time point before and after it, but weights the current timepoint twice as much as the timepoints before and after it: (1,2,1), to prevent amplitude reduction			1	707.4	690.271	813.625	449.021			Standard Deviation was calculated between replicates for each time point using an R code			1	467.66	183.273	477.945	69.0025
	1	1007	844.667	7	870.667	475	770	580.667	1107	458	506.667	442.667	334	464.667					2	687.083	674.094	783.625	437.5						2	454.032	180.783	460.621	72.3204
	2	917.333	806	7	803.333	426.667	710	497.667	947.333	386.667	484	398.333	283.667	405.667					3	609.25	608.177	670.625	390.792						3	402.686	173.845	396.392	78.4764
	3	792.333	699.333	9	708	372	649.5	429.667	802	330	423.667	345.667	239.333	352.667					4	527.983	540.615	568.625	341.188						4	347.779	161.213	335.345	74.7686
	4	663	602	14	604.667	332.667	585.5	371	671.667	279.333	361.667	293	205.333	304.667					5	449.083	474.969	480.25	293.063						5	291.966	142.554	280.721	64.758
	5	560.333	498.667	22	515.333	288.667	525	323.667	569.667	238.333	310	242.667	180	265.667					6	381.6	414.74	407.417	251.479						6	242.067	123.767	234.759	53.1741
	6	475	424.667	32	430.667	254.667	468	283.333	482.667	209.667	255.333	207.667	162.333	237					7	327.183	360.469	349.125	217.25						7	199.644	105.175	195.338	40.668
	7	407	358.333	41	352.333	226	410.5	252.667	414	186.333	211	176.667	152.667	212.667					8	283.95	312.323	302.667	190.063						8	164.792	86.0757	162.281	28.4683
	8	352.667	312.667	48	289.333	203	355.5	229.667	359	169.333	173.667	154.667	152	192.333					9	249.9	271.49	265.833	170.063						9	137.078	68.6259	135.175	19.2506
	9	312	273.333	53	242.667	182	309	213.667	313.667	156	147.333	131.667	163	180.667					10	224.117	239.802	237.292	158.542						10	115.739	53.8505	113.314	19.6382
	10	286.667	248.333	59	214	174	271	205.667	283.333	147.333	134.667	124	191	169					11	208.55	220.24	218.583	158.771						11	101.281	40.5027	97.4629	29.8413
	11	286.667	242.333	67	211.667	176.333	245.5	213.667	269.667	148	141.333	137.333	231.333	170.333					12	208.567	217.281	212.833	174.875						12	96.6273	27.5787	86.7384	41.9136
	12	329.333	277.333	76	246.333	202.667	236.5	232	274	162.667	176.667	170.667	283	188.333					13	230.983	237.333	223.292	210.792						13	107.622	20.4651	78.5478	49.3139
	13	433	353	86	327.667	254.667	250.5	282.333	297.667	197.667	255.333	234	339.333	226.333					14	281.1	288.458	252.958	271.771						14	140.743	40.3835	70.8875	46.7711
	14	596.333	476.333	99	474.333	350.333	273.5	369.333	343	253.333	395	350.667	389	285					15	364.317	379.646	304.958	358.729						15	200.314	88.0044	61.2237	49.3931
	15	832.333	681	118	701.333	502.333	324.5	496	409.333	342.333	553.333	510.667	423.667	357.667					16	485.433	518.479	381.125	460.729						16	288.564	157.49	43.1924	89.9347
	16	1111.33	973	141	997	712.667	411.5	658.667	485	464.333	722	676	435.333	428					17	639.7	700.917	479.667	559.833						17	399.681	239.228	9.19239	152.833
	17	1400.67	1299	175	1301.67	960.333	517.5	851.333	565.333	621.667	863	805.667	431	489.667					18	809.833	906.479	595	637.458						18	515.36	320.413	41.0122	212.671
	18	1654.33	1587.67	220	1586.33	1202	630.5	1043.33	648.333	788.333	949	870	410.667	529.667					19	975.117	1106.48	715.958	680.521						19	614.705	390.975	95.2826	254.537
	19	1840.67	1849.33	286	1801	1417.33	720.5	1209.67	732.333	935	973.333	884	380	543					20	1114.72	1266.06	826.458	682.438						20	679.324	442.193	139.005	270.625
	20	1946.33	1952.33	370	1913	1492	769.5	1323.33	799.667	1040.67	926.667	801.333	346.333	524.667					21	1210.78	1359.74	909.792	647.042						21	698.248	466.691	167.643	260.714
	21	1948.67	2012.33	463	1909.33	1547	781	1374.33	833.333	1097	839.333	732.667	313	489.333					22	1252.18	1380.65	954.333	590.562						22	670.354	462.098	183.259	236.242
	22	1847	1894.33	551	1785.67	1480	748.5	1355	832.667	1101	748.333	631.667	278.333	443					23	1237.07	1333.17	956.292	528						23	603.283	432.11	185.085	207.968
	23	1670.67	1791.67	620	1584.33	1433.33	690	1273	803	1049.67	644	583.667	249	394.333					24	1177.93	1235.65	916.75	466.958						24	520.148	389.276	171.591	180.18
	24	1447.67	1656	664	1351.67	1337	610.5	1140.67	743	952	549.333	512.667	218	348					25	1080.35	1098.6	841.958	405.146						25	426.619	339.899	145.605	151.219
	25	1220.33	1342.33	691	1112	1095.33	519	991	667	826	461.333	398	188.333	307.667					26	949.633	933.208	745.667	341.896						26	317.522	280.474	113.019	119.703
	26	985.667	1078.67	688	876.333	902.333	435.5	842.667	586	698.333	382.667	311.667	165.333	272					27	810.033	770.312	643.583	285.938						27	216.663	222.741	81.0816	92.5606
	27	787.667	840	666	688.667	734	364	707.333	506	581	321.667	247	145.667	242					28	682.85	630.812	546.292	242.667						28	145.587	177.125	55.2133	72.938
	28	636	672	639	557.333	594.667	301.5	594.667	431	481	276.667	209.667	135.667	216.333					29	579.017	517.896	459.125	211.25						29	112.143	142.525	36.5928	58.063
	29	526	557.667	636	459.667	480.667	255	500.667	365	397	240.667	181.333	131.333	193.667					30	500.417	428.885	384.75	188.896						30	112.403	115.819	23.4524	45.2861
	30	448	467	629	386.333	393.667	216	426	311.667	330.333	216	164.667	134	175.333					31	440.667	360.646	324.125	174.688						31	125.49	96.111	13.7297	34.5366
	31	393.667	410	609	341	333.667	187	368.667	269.333	277.667	205.333	157.667	144	161					32	394.35	310.906	276.875	169.312						32	134.65	81.9168	5.71578	27.0598
	32	359	369.667	574	315.667	287.667	169.5	319	241	238	207	159.333	162.667	154					33	358.9	276.927	242.292	173.562						33	134.257	71.7173	1.59099	25.417
	33	340.667	358	523	307.667	266.667	158.5	284	222.333	211	226	174	187.333	155.667					34	333.1	257.521	218.583	188.125						34	125.748	66.7322	8.48528	31.0837
	34	339	356.333	472	320.333	258.667	157.5	258.333	212.667	190.333	264.333	199.333	213	164.333					35	318.467	252.865	204.583	213.812						35	115.046	67.9119	15.9099	42.3112
	35	357.667	394.667	424	347.333	275.667	168	248.333	215.667	181.667	324	255	233.667	183.333					36	317.717	264.229	200.833	250.042						36	109.597	75.2181	24.8666	58.836
	36	397	455.667	375	397.667	315	192.5	249	229.667	179.333	391	320	249	207.667					37	331.733	293.635	207.292	291.625						37	119.225	89.491	35.2964	80.8296
	37	463.333	549.333	332	474	377.667	233.5	265.333	254	189	458	385.333	256.333	235					38	359.633	340.781	224.042	331.292						38	146.78	111.906	45.4316	105.528
	38	544	635.333	304	577.333	447.333	281	291.667	287	210.333	520	428.333	255.333	260					39	399.25	403.667	250.667	364.167						39	183.823	141.065	52.9152	129.778
	39	641	737.333	290	696.333	539	348.5	329.667	324.333	243.333	561	479	246.333	278.333					40	450.5	481.021	286.083	387.021						40	227.735	173.162	56.5685	150.85
	40	742.667	878.667	280	822.667	645	426	378.333	368.667	287.333	576.333	507.333	230.333	285.333					41	512.167	567.104	329.583	394.646						41	276.355	203.586	56.6864	163.621
	41	854.333	993.333	288	942.333	732	505.5	436.333	417	340	561	494	213	283					42	581.517	654.073	379.042	386.812						42	322.585	229.428	52.9741	166.15
	42	956.333	1142	327	1045	845.667	573.5	496.667	463.333	399	525	499	192.667	271					43	655.1	733.75	430.75	368.667						43	357.493	248.858	45.0191	161.794
	43	1041.67	1218	410	1117.33	909.333	616.5	559	506.667	457.667	480.333	461.333	175	255.667					44	720.05	789.562	480.042	340.729						44	362.577	256.364	33.5286	149.637
	44	1084	1186	526	1142.33	890.333	627.5	607.667	538.333	511	433.667	394.667	157.667	233.333					45	762.867	810.323	520	306.146						45	333.473	249.506	19.0919	131.726
	45	1085.67	1121	629	1118.33	856.667	621	631.333	550.667	546.333	388	344.667	142.667	212					46	780.017	800.135	543.083	273.208						46	290.759	232.237	3.88909	114.934
	46	1038.33	1047	703	1045.33	816.667	588	629.667	543.667	557.667	342.667	313.333	129.333	192					47	770.817	763.875	546.458	245.396						47	248.009	207.932	8.66206	101.433
	47	947.333	951	734	940	758.667	530	606.667	523.333	548.667	304.667	289	118	172.667					48	735.217	705.104	531.958	222.188						48	206.599	180.425	16.9116	90.908
	48	842.667	832	721	817.333	686	465	563	489.667	520.667	274.667	268.333	110	156					49	678.017	630.604	503.042	202.125						49	167.492	152.979	21.39	81.2138
	49	728.667	701.667	682	693	594	391	513.667	449	482.667	245.667	238.333	104.667	143					50	609.017	550.146	464.5	184.604						50	133.925	129.373	23.0988	71.3686
	50	617.333	614.667	612	570	540.333	315	462.333	405	437.333	222	226	101	132.333					51	536.45	472.573	420.583	170.125						51	106.435	112.978	22.6274	61.8816
	51	513.667	506.333	544	470	461	252.5	410.667	359.333	389	199	202	103	123.667					52	464.5	401.375	374.792	158.125						52	83.7637	100.668	20.0936	51.6454
	52	426	404.667	489	392.333	384.667	204	365	318.667	340.667	188	180	107.667	117.667					53	400.85	341.625	330.833	150.521						53	70.4366	90.8497	16.0278	43.136
	53	357.333	357.667	452	333.667	353	167.5	325.667	281.333	298.333	181.333	183.333	115.667	113.667					54	350.583	296.542	291.25	149.521						54	65.9613	84.6777	12.2565	39.4409
	54	306.667	311.333	410	291.667	309.667	142	295.667	249	262.333	188	184	125.333	113.667					55	311.383	262.052	257.875	154.667						55	64.0638	78.9791	9.25131	39.6925
	55	272.333	284.333	385	262	275.333	125	272.667	226	234.667	206.333	195.667	135.333	121.333					56	282.217	236.958	231.458	166.042						56	61.8761	73.7503	6.54074	44.8154
	56	250.667	281.667	349	246	263.667	115	257.667	206.333	212.667	234.667	224.667	142.333	126.667					57	262.583	222.188	211.25	182.292						57	58.6739	70.5318	4.8319	55.1572
	57	244.667	288.667	324	244	251	112	248.333	192.667	198.667	265	251.667	146.333	138.333					58	251.317	216.042	196.917	199.333						58	56.6147	68.0508	3.53553	66.685
	58	251.667	302.333	301	257.667	243.333	117	245.667	186	187.667	296	265	148.333	149					59	248.067	217.708	188.417	214.354						59	58.0481	66.066	0.471405	77.2004
	59	272.667	335	279	284.667	237.667	131	247.333	187.667	181	322.667	282	146	161					60	252.733	228.365	185.333	227						60	66.8422	67.2279	4.00694	87.3902
	60	303.333	388.333	252	327.333	253.667	149.5	258.333	191.333	180.333	338.667	301.667	140.333	169.667					61	264.2	248.937	187.083	235.375						61	85.0322	73.7631	8.36743	95.745
	61	343	437.333	233	385	269.333	177	273.333	201.667	183	345.333	301	133	174.333					62	281.85	278.073	193.417	237.583						62	109.466	85.1185	12.7279	100.709
	62	387.333	510	222	448.667	299.333	210	293	215	191.333	341	305.333	123.333	174					63	306.2	313.948	204.083	233.667						63	137.381	99.3079	17.0884	101.822
	63	436.333	578	225	518.333	334.667	250.5	313	233	202.333	321	293	113.333	170.333					64	336.067	355.552	218.042	224.146						64	166.417	113.716	21.5078	98.9514
	64	485	661	233	583	387.667	297.5	336.667	252	215.333	303	278	104.333	162					65	367.983	400.198	234	210.854						65	194.125	125.641	25.9272	93.6468
	65	535.333	717	238	638.667	432.667	345	360.667	272.333	229.667	274	261.667	94	151.667					66	397.533	442.323	251.542	195.104						66	214.959	133.94	29.1682	86.5279
	66	578.667	748	252	681.333	464	386	387	292	249	244	240.333	85.3333	142					67	422.6	476.531	269.875	178.792						67	224.956	137.34	29.7574	78.3196
	67	610	761.333	274	698.667	489	414.5	408.667	307.333	267.667	219.667	225	78.6667	132.667					68	441.717	497.365	286.75	163.5						68	221.551	135.04	27.9307	70.1672
	68	620	729	322	694.333	480.667	421.5	421.333	319.333	283.667	195.333	200.667	73	123.333					69	452.85	499.833	300	148.354						69	200.043	128.779	24.8666	61.3053
	69	606.667	662	401	667.333	450.667	411.5	421.333	324.333	294.667	175	175.333	68.3333	114.333					70	457.1	485.458	307.25	134.542						70	167.661	119.388	20.8597	52.7893
	70	577	605.667	491	620.333	427	389.5	411	320	297	158.667	163	66	106.667					71	455.133	459.229	307.583	123.75						71	141.497	107.362	14.7314	46.0812
	71	531.333	533.667	560	566.667	390	356.5	388	307.667	300	145.333	148.333	64	100.667					72	443.65	424.833	299.833	115.833						72	131.569	94.8522	9.54594	40.8154
	72	482	477.667	591	506.333	360.667	318.5	361.667	291	275.333	138	143.333	65.6667	95.3333					73	422.75	387.677	283.583	111.521						73	133.82	81.0935	9.54594	37.6387
	73	427.667	439.333	593	440.667	351.333	280	335.333	271.667	256.667	133	148	67	93.3333					74	395.9	351.115	264.083	110.583						74	135.382	67.5202	10.6066	36.7605
	74	373.667	400	561	382.333	325.333	242	306.333	252	237.667	133	149.667	70.6667	91					75	364.4	314.604	244.708	111.979						75	129.524	58.4314	10.0763	36.9362
	75	325.667	364.333	511	328.667	302.333	203	280.333	231.667	218.333	137	156.667	75.3333	92.6667					76	330.117	279.854	225.042	115.354						76	117.267	54.6837	9.13346	37.6937
	76	286.333	330	449	288.667	277.667	168	258.667	210.667	200	145	159	78	96					77	297.1	250.76	206.167	120.604						77	100.971	55.6765	7.42462	39.8969
	77	258	323	380	257.667	273.333	139.5	241.333	192.667	185.333	157.667	173.333	80.6667	100.333					78	268.817	229.51	189.875	127.958						78	84.2395	60.2391	5.24438	44.1834
	78	237	310	323	242.333	267	117.5	228.667	178.333	174	171.333	184	82.3333	107.667					79	245.633	215.438	177.208	135.833						79	70.319	65.6691	2.88735	48.8278
	79	224	303	267	235	263.667	104.5	221	167.667	167.333	182	191.667	83	114					80	228.4	206.927	168.458	142.563						80	61.7606	69.5633	0.412479	52.9081
	80	222.333	315	225	219.333	272.333	100	215.333	161.333	164	191.667	200.667	82	120					81	218.667	203.823	163.708	147.271						81	62.0304	72.3689	2.18025	55.9912
	81	228.667	326.333	190	232.333	274.667	100	216	158.333	165.667	195.333	196.667	80	125					82	215.617	205.948	162.875	148.688						82	68.7769	73.7761	5.24438	57.0333
	82	241.333	344.667	171	231.333	282.333	108.5	220	158.667	171	194.333	193	76	127.333					83	218.3	211.948	165.75	146.75						83	77.1661	72.5435	8.36743	56.247
	83	262	357	162	253	281.667	122.5	226.667	163.667	179	190	180	73	126.667					84	227.167	223.167	172.458	142.896						84	86.7279	70.7634	11.9619	54.4981
	84	287	396.667	161	275.667	306.667	141.5	237	170	194.667	177	183.667	68.6667	127					85	241.383	239.615	182.375	137.604						85	97.8718	69.866	17.1473	52.0351
	85	312.333	419	167	303.333	311.333	165	248.667	177.333	209.667	166.333	164.667	64	124.333					86	257.467	257.271	194.25	130.146						86	106.096	66.8752	22.2739	48.4452
	86	338.333	435.667	180	329.667	316	192.5	260.667	189.333	226	158	150.333	59.3333	119.667					87	273.133	274.26	207.625	121.25						87	108.237	61.9343	25.8683	44.0473
	87	363.333	434	198	351.667	317.333	219.5	273.667	201.333	242	140	136	56	114					88	287.383	290.698	221.292	112.292						88	104.968	57.5462	28.2253	39.5978
	88	383.667	428	221	374.333	323.333	245	285.333	213.333	255	128	129.667	52	107.667					89	298.733	304.906	233.917	104.333						89	96.5119	54.7842	28.9914	35.8871
	89	395.333	399.333	248	390.667	312	264	293.667	225.667	265.667	118.667	117.667	50	102.333					90	307.083	314.667	244.792	97.5208						90	84.9929	53.5864	27.9896	32.7445
	90	397.333	392	276	396.333	314.667	275	300	235.333	272	109	113.333	47.6667	95.6667					91	312.6	318.406	252.292	91.5208						91	73.0641	52.5903	25.8683	29.7841
	91	392.667	357.667	310	392.333	291.667	275.5	302.667	239.667	272.667	102	104	47	91.3333					92	314.583	315.24	255.25	86.5625						92	62.5642	51.4155	23.2167	26.9572
	92	379.333	342.333	342	380	285.333	268.5	299.667	240.667	269.333	95.6667	101	47	87					93	313.333	306.25	254.292	82.8125						93	56.919	49.751	20.8007	24.4349
	93	357.333	311.333	376	360.667	262.667	254.5	293	237.333	264.667	91.6667	96	47.3333	84.3333					94	308.1	292.198	248.542	80.3958						94	59.6893	47.8313	18.208	22.4633
	94	331.667	283	406	337.333	243.333	237	282.333	227.333	247	92	93	48.3333	83.6667					95	298.617	274.677	237.333	79.3333						95	70.4006	45.7468	14.26	21.1008
	95	304.333	260.333	423	312.333	229.333	217	265.333	217	231	89	95	49.6667	82.3333					96	286.7	255.917	223.667	79.25						96	82.196	43.3446	9.89949	20.319
	96	279	238.667	431	290.333	213.667	195	247.667	205.333	213.667	90.6667	95	51	82.3333					97	272.817	236.781	209.375	80.3333						97	90.6121	41.5869	6.42289	20.1442
	97	254	221.333	421	266.667	200.333	173.5	230.667	191.667	197.333	95.3333	98.6667	53.3333	84					98	257.9	218.927	194.417	83.0208						98	93.8456	40.0678	3.65339	20.8705
	98	234.667	221.667	405	247.667	198	153.5	214.667	178.667	179.667	100.667	104	55	87					99	243.6	203.656	179.667	86.5208						99	92.2055	39.5966	1.17851	22.2537
	99	217.333	219.333	379	232.667	192.333	134	200.667	166.333	165.333	105.333	107.667	56.3333	90.3333					100	229.667	190.635	166.292	90						100	85.9725	41.0543	0.766032	23.71
	100	204.667	225.667	340	220.667	189.667	118	188.667	156	152.667	114.333	108	57.6667	94					101	217.483	181.031	154.792	93.1667						101	76.0803	43.9074	1.59099	25.3474
	101	197.667	257.333	300	211.667	207.667	104.5	179	145.333	144	111.667	117.333	56.6667	97.3333					102	208.717	175.719	145.083	95.125						102	68.3278	48.8786	0.942809	26.8099
	102	194.667	277.667	261	209.667	212.333	95.5	171.333	136.333	137	112.333	115	55.6667	99					103	201.85	173.26	137.417	95.2917						103	66.407	54.1408	0.353553	27.3261
	103	194.333	297.667	224	215	217.333	93	166.333	130.667	132.667	111	111.333	54.3333	101					104	197.083	174.042	132	94.4792						104	70.6127	58.4392	2.23917	27.3212
	104	198.333	328	194	223.667	230	94.5	164.333	124	132	108.667	110.333	52.3333	103					105	195.183	178.833	128.542	92.8958						105	79.8019	62.6407	5.00867	27.1505
	105	205	341.667	172	240.667	238.333	102	163.667	121.333	131.667	102.667	104.667	50.6667	102					106	194.717	186.604	127	89.9167						106	88.2645	66.0451	8.01388	26.4698
	106	213.667	352	155	261	243.333	113.5	166	118.667	135.333	98.3333	98.6667	47.3333	100					107	196.117	197.021	127.875	86.2917						107	95.2978	68.7726	11.4905	25.4339
	107	225.667	370.667	143	283	256.667	130	170.333	120.333	141.667	91.6667	95	47.3333	98					108	200.517	209.635	131.083	82.7917						108	102.444	71.4104	15.4385	24.2569
	108	239.667	382.667	140	302.333	266.333	146	175.667	121.333	149.333	86.6667	89.6667	44.3333	95.6667					109	207.117	222.573	135.75	79.2708						109	108.101	73.0379	19.5633	23.2425
	109	253.333	395	144	314.667	278.667	163.5	183.667	124.667	158	81.3333	86.6667	43.3333	92.3333					110	213.7	233.323	141.583	75.4583						110	108.791	72.3067	23.4524	22.0956
	110	266	376.333	152	326.667	268	177.5	189.667	129.333	167.333	76.6667	77.3333	41	88.6667					111	219.55	241.208	148.25	72.1458						111	105.103	70.435	26.5165	21.0381
	111	272.333	386.667	165	332	279	186.5	197.667	134.667	175.333	81	76.6667	40	85.6667					112	225.083	246.406	155.333	69.9375						112	99.3298	68.0989	29.1092	20.4629
	112	275.667	360	181	331.333	264.333	190	204.667	140.333	185.667	70.3333	71.3333	39.6667	87.3333					113	228.917	247.927	161.875	67.5417						113	90.2449	64.4836	31.1716	19.4751
	113	272.333	351.667	202	323.667	267.333	189	211	144	189	68.3333	73.6667	39	79					114	230.667	246.24	167.375	65.1667						114	78.6854	59.3145	32.8215	18.0512
	114	265	318.667	222	313.333	246.667	192.5	215	148.333	198.667	67	69.3333	39.3333	78.3333					115	230	240.354	171.917	63.8542						115	65.6354	53.5149	34.2947	16.9862
	115	251.667	291.667	244	296	230.667	176	217	150	198.333	67.3333	69	39.6667	77.6667					116	226.767	230.24	173.958	63.5625						116	54.3429	49.484	34.4715	16.2089
	116	235.667	263.667	264	280.333	215	166	215.667	150	198	67.6667	69.6667	42	76.3333					117	222.05	218.458	173.458	63.9167						117	48.86	46.9392	33.7643	15.6033
	117	219	238.333	282	262	195.667	153	211	148.333	195	69.6667	69.3333	41.3333	77.3333					118	216.35	206.042	170.792	64.7292						118	49.8814	44.49	32.7037	15.7556
	118	200.667	224	294	242.667	188	142	203.667	144	187.667	71	73.6667	42	78					119	210.583	194.281	165.5	66.7083						119	55.155	42.126	30.877	16.658
	119	189	219	303	226.667	181	129.5	197	138.333	179	72.3333	83.3333	43.3333	81.3333					120	204.633	183.396	158.708	69.125						120	60.6329	40.484	28.461	17.7035
	120	175.667	202.667	304	211.333	171.333	119	188	133.667	169.667	74.3333	81	44	81.3333					121	197.2	172.375	151.333	70.3542						121	63.813	39.3002	25.4558	17.9063
	121	168.333	192.333	297	199	158.667	109.5	177.333	127.667	159	76	81	44.6667	82.3333					122	189.133	162.24	143.542	71.0417						122	64.1165	38.5735	22.4506	17.9403
	122	160.667	192	284	192	156	100.5	168.667	121.667	150	76.6667	82.6667	44.6667	84					123	181.217	154.802	135.917	71.8542						123	61.2106	39.5094	20.0347	18.406
	123	157.667	188.333	260	195.333	149.667	93	160	116	141.333	76.6667	82.6667	44.6667	85.6667					124	173.25	149.344	128.958	72.4792						124	55.4545	41.492	17.8544	19.0479
	124	157.667	190	237	189.667	147.667	87	152	111.667	133.667	75.6667	87	44	85.6667					125	166.7	145.531	123.083	72.6667						125	48.8979	43.2424	16.0278	19.6842
	125	164	200	210	194.667	153.333	83.5	146.333	107.667	129	74.3333	83.3333	43.3333	87.3333					126	162.3	144.802	118.125	72.0208						126	44.4791	45.6349	15.026	19.8779
	126	172	209.333	187	201.333	156.667	83.5	143.333	103	123.333	75	79.6667	42	86.6667					127	159.783	146.719	114	70.8542						127	44.4266	48.448	14.6135	19.9197
	127	184.333	221.667	167	210	161.667	87	141.333	101	121.667	72.6667	78.3333	40.6667	87					128	159.45	149.885	111.375	69.3958						128	48.5508	50.5186	14.5546	19.9939
	128	198.333	234.333	151	217.667	163.667	93	139	99.3333	120	70	75	39.3333	85.3333					129	160.6	153.865	110.167	67.3333						129	54.9073	51.7905	14.9671	19.7745
	129	208.667	243.667	138	227	166.333	101.5	140.333	98.6667	121.333	66.3333	71	38	84					130	162.05	158.635	110.125	64.875						130	60.3398	52.5861	15.7331	19.211
	130	220.333	242.333	133	237	164.333	111.5	141.667	99.3333	122.333	64	67	37.3333	81.3333					131	164.167	164.292	111.375	62.8333						131	64.078	53.4211	16.7938	18.6544
	131	231.667	250	129	245.667	174.333	120.5	144	100.667	127	61.6667	68.3333	36.3333	80.3333					132	166.983	170.333	113.75	61.25						132	66.6736	54.3813	18.0312	18.2892
	132	238.667	245	129	253.667	174.667	128.5	145	103.333	129.667	59.3333	64.6667	35.3333	77.6667					133	169.133	175.49	116.875	59.7083						133	66.5914	55.172	18.6794	17.5517
	133	242	237.667	132	258.667	177	134	150	107.333	134	57.6667	64.3333	37	75.6667					134	170.983	179.146	120.833	58.375						134	63.7144	55.3492	18.974	16.6491
	134	242	233	142	259.333	179	135.5	151.333	111.667	139.333	56.6667	62.6667	34.6667	73.6667					135	173.15	180.969	125.333	57.3125						135	59.0393	54.8361	19.2097	16.2875
	135	237.667	224	153	256.667	181.333	133.5	154	116.333	143	57	62.6667	34.6667	72.6667					136	174.533	180.646	129.667	56.7083						136	52.4534	53.6342	19.5633	16.0385
	136	229	210	168	251	175.667	129.5	158	119	148.667	56	63.3333	35	71.3333					137	174.483	178	133.375	56.4375						137	44.4647	51.5123	20.2115	15.5101
	137	216	194	184	240.667	168.667	124.5	160.333	122	150.333	57	61.3333	35.6667	70.6667					138	173.767	173.792	136.042	56.5417						138	37.6348	48.6391	20.4472	15.0669
	138	202.667	187.333	202	229	168.667	117.5	163	123.333	152.667	57.3333	65	36.3333	71					139	172.367	168.844	137.458	57.1458						139	34.0687	45.7262	20.6829	14.9171
	139	186.667	174	209	216.667	161.667	111	161.667	122.667	152.667	57.6667	65.3333	37	70.3333					140	168.967	162.677	137.167	57.75						140	33.2461	43.1466	20.8597	14.7897
	140	170	163.667	217	204.667	152.333	105	160.667	121	149.667	59	66	37.6667	71					141	164.133	155.74	135.042	58.2917						141	34.5552	40.9933	19.8579	14.6872
	141	158.333	154	219	194	145.333	98.5	157.667	119.333	144.333	59.6667	65.3333	38	72					142	159.15	149.313	131.667	58.875						142	36.3545	39.5185	18.2669	14.852
	142	146.333	154	216	184.667	144	92	154.667	115.333	140	60.6667	66.3333	38	73.3333					143	154.183	144.042	127.375	59.5208						143	36.8023	38.68	17.1473	15.2918
	143	138	155.667	207	178	144.667	86.5	149.333	111	133.667	61	68.3333	37.6667	73.6667					144	149.683	139.979	122.625	60.1042						144	36.0151	38.4823	16.2045	15.9251
	144	133	164	198	173.667	146	82	145.667	107.333	129	61.3333	68.3333	37	75.3333					145	146.233	136.833	117.917	60.3333						145	35.2064	38.7033	15.2028	16.5202
	145	129.667	174	187	169.333	147.667	78.5	140.667	103	123	60.6667	67.3333	36.6667	76					146	144.067	134.76	113.125	60.4375						146	36.0839	39.0957	14.0832	16.7461
	146	129	196	175	168	155.333	77.5	135.667	99.3333	117.333	61.3333	69	37.6667	75.6667					147	143.25	134.115	108.458	60.5625						147	40.2658	40.1533	12.7868	16.8352
	147	129.333	215.333	162	168.667	161.333	76	130.667	96	112.333	60.6667	68.3333	36	76					148	142.9	134.052	104.292	60.2708						148	46.3161	41.5945	11.3726	17.1687
	148	133	225.333	152	172.667	158.333	77	127	93.6667	107.333	60	66	35.6667	77					149	142.267	134.083	100.458	59.2708						149	51.6067	42.6108	9.95842	17.1251
	149	136.667	234.667	143	178.333	158	78	124.333	90.3333	103	58.3333	63.3333	35	73.3333					150	142.083	134.312	99.5	58.7292						150	52.7914	42.9584	9.78164	16.8166

## Sheet: SFig7_B_Technical_Replicates
Biological Replicate 1:	WT_T1	WT_T2	WT_T3	WT period calls		set1_T1	set1_T2	set1_T3	set1 period calls		swd3_T1	swd3_T2	swd3_T3	swd3 period calls		Biological Replicate 2:			swd3_T1	swd3_T2	swd3_T3	swd3 period calls		WT_T1	WT_T2	WT_T3	WT period calls		set1_T1	set1_T2	set1_T3	set1 period calls		Biological Replicate 3:			set1swd3_T1	set1swd3_T2	set1swd3_T3	set1swd3 period calls		set1_T1	set1_T2	set1 period calls		swd3_T1	swd3_T2	swd3 period calls
	437	601	586	21.0316		960	1182	1170	23.7857		981	923	966	23.2326					601	477	497	24.975		499	473	481	22.9655		961	954	830	24.0723					1327	1275	1226	24.975		6	150	25.2911		771	872	23.2326
	415	571	534	21.4839		891	1065	1065	23.2326		897	847	868	22.7045					547	423	455	25.2911		434	454	440	21.7174		854	889	791	23.5059					1106	1116	1099	22.7045		7	156	23.5059		741	799	22.7045
	392	539	521	21.956		815	973	964	23.5059		819	793	798	22.9655					530	371	379	24.975		381	420	394	21.956		826	849	743	24.0723					893	978	971	24.3659		7	175			688	732
	346	471	454			714	835	828			717	699	708						472	325	319			325	374	338			708	738	652						703	858	845			9	197			634	665
	297	398	390			603	688	698			605	598	611						425	290	283			270	322	287			620	630	556						548	735	732			14	227			578	593
	254	342	334			514	577	590			514	513	519						367	253	246			225	267	236			514	514	468						441	634	634			22	256			521	529
	214	280	272			433	493	499			437	429	426						323	223	218			190	234	199			449	430	395						354	540	554			32	292			466	470
	180	229	224			368	427	426			375	349	333						290	197	191			167	198	165			382	358	335						290	468	484			41	345			407	414
	148	187	186			316	369	373			326	275	267						262	177	170			149	174	141			334	312	292						247	403	427			48	400			356	355
	127	154	161			276	328	332			288	221	219						234	160	152			133	146	116			296	268	256						215	344	382			53	446			314	304
	114	136	154			250	306	304			267	188	187						225	153	144			128	134	110			276	239	230						201	297	352			59	488			281	261
	115	137	172			239	313	308			275	180	180						228	154	147			148	141	123			269	227	231						200	275	334			67	527			259	232
	135	168	227			266	365	357			321	209	209						257	180	171			194	168	150			308	259	265						215	277	330			76	552			255	218
	189	240	337			354	470	475			413	283	287						309	234	221			266	225	211			390	334	335						245	299	349			86	572			279	222
	293	366	526			495	625	669			564	428	431						407	336	308			395	334	323			500	461	468						298	335	396			99	580			333	214
	421	518	721			723	825	949			785	665	654						563	497	447			567	491	474			685	646	712						377	394	457			118	584			406	243
	564	666	936			986	1070	1278			1075	978	938						787	704	647			739	674	615			952	897	1070						477	464	514			141	571			498	325
	690	797	1102			1235	1357	1610			1352	1299	1254						1073	930	878			885	808	724			1277	1182	1438						590	547	559			175	555			592	443
	789	876	1182			1450	1627	1886			1609	1600	1550						1380	1146	1080			944	890	776			1569	1449	1745						706	643	596			220	524			685	576
	829	902	1189			1591	1841	2090			1808	1824	1771						1643	1342	1267			954	918	780			1831	1696	2021						813	740	644			286	501			753	688
	809	864	1107			1672	1978	2189			1923	1934	1882						1741	1408	1327			860	838	706			1919	1792	2146						895	802	702			370	480			782	757
	738	795	985			1661	2004	2181			1934	1915	1879						1809	1464	1368			774	765	659			2029	1837	2171						932	822	746			463	452			776	786
	663	718	864			1592	1913	2036			1824	1788	1745						1742	1396	1302			672	654	569			1903	1723	2057						936	802	760			551	414			726	771
	578	636	718			1449	1736	1827			1654	1571	1528						1704	1349	1247			621	599	531			1871	1606	1898						898	764	747			620	380			654	726
	501	547	600			1253	1521	1569			1429	1340	1286						1604	1249	1158			551	511	476			1718	1495	1755						831	700	698			664	361			563	658
	422	471	491			1062	1294	1305			1209	1095	1032						1331	1012	943			428	392	374			1386	1210	1431						739	629	633			691	340			468	570
	349	396	403			855	1061	1041			980	856	793						1113	827	767			331	305	299			1160	951	1125						642	554	562			688	330			392	479
	289	338	338			678	853	832			779	663	624						918	674	610			266	236	239			929	741	850						541	481	496			666	333			338	390
	241	295	294			552	683	673			636	534	502						765	542	477			226	193	210			753	605	658						444	414	435			639	343			289	314
	206	255	261			459	562	557			522	442	415						632	429	381			191	166	187			620	509	544						358	358	379			636	365			254	256
	182	224	242			391	478	475			437	375	347						523	347	311			170	152	172			505	446	450						286	314	335			629	394			224	208
	172	209	235			342	424	415			386	332	305						443	290	268			157	147	169			429	402	399						231	281	296			609	437			201	173
	171	207	243			314	383	380			352	311	284						373	252	238			155	150	173			375	370	364						192	261	270			574	480			191	148
	186	222	270			297	364	361			337	308	278						335	238	227			166	166	190			354	362	358						164	252	251			523	518			184	133
	215	258	320			293	361	363			343	325	293						313	238	225			189	192	217			348	362	359						147	249	242			472	539			186	129
	261	320	391			306	373	394			354	360	328						321	257	249			246	247	272			375	406	403						144	259	244			424	545			198	138
	312	381	480			337	408	446			391	420	382						362	297	286			316	313	331			415	472	480						153	283	253			375	526			224	161
	366	443	565			400	461	529			442	511	469						432	356	345			385	384	387			502	563	583						174	314	274			332	506			268	199
	419	495	646			471	523	638			518	630	584						521	417	404			430	433	422			563	653	690						206	351	304			304	475			317	245
	457	524	702			564	599	760			606	766	717						631	500	486			482	498	457			622	767	823						245	385	343			290	434			384	313
	477	530	722			664	688	876			707	909	852						759	597	579			520	531	471			760	899	977						292	422	392			280	404			461	391
	469	503	711			765	801	997			825	1029	973						861	674	661			506	523	453			863	1009	1108						344	461	446			288	386			539	472
	445	462	668			853	908	1108			943	1120	1072						996	779	762			514	529	454			1034	1144	1248						397	500	493			327	368			602	545
	413	418	610			921	1005	1199			1036	1178	1138						1074	838	816			478	488	418			1103	1219	1332						450	532	538			410	348			639	594
	374	384	543			954	1062	1236			1083	1182	1162						1056	819	796			407	418	359			1047	1199	1312						492	555	568			526	329			644	611
	336	353	475			954	1077	1226			1077	1147	1131						1024	789	757			358	363	313			1008	1125	1230						518	553	581			629	307			621	621
	296	327	405			908	1040	1167			1026	1064	1046						989	754	707			325	331	284			961	1038	1142						526	530	575			703	290			587	589
	260	301	353			834	953	1055			937	956	927						931	697	648			296	305	266			877	935	1041						520	495	555			734	272			528	532
	235	279	310			744	858	926			829	831	792						854	625	579			276	281	248			780	811	905						497	452	520			721	258			459	471
	206	259	272			645	744	797			718	704	657						750	540	492			240	251	224			668	677	760						460	409	478			682	248			389	393
	189	243	234			546	636	670			607	581	522						694	487	440			224	241	213			611	576	657						418	364	433			612	242			322	308
	171	225	201			454	535	552			515	478	417						598	412	373			195	217	194			510	464	545						371	322	385			544	243			265	240
	164	216	184			376	448	454			441	396	340						508	342	304			167	196	177			417	366	431						327	286	343			489	249			222	186
	158	209	177			315	380	377			383	332	286						475	312	272			162	203	185			392	315	366						283	258	303			452	261			187	148
	163	214	187			270	329	321			336	287	252						424	272	233			165	202	185			340	279	315						244	234	269			410	286			162	122
	181	225	213			235	296	286			299	256	231						385	238	203			177	212	198			316	258	279						211	222	245			385	316			144	106
	203	243	258			211	277	264			273	242	223						373	229	189			210	239	225			324	257	264						183	213	223			349	352			133	97
	231	261	303			199	277	258			260	242	230						354	217	182			244	266	245			332	269	265						160	213	205			324	392			131	93
	258	282	348			198	290	267			262	260	251						330	221	179			265	279	251			342	289	276						146	217	195			301	431			137	97
	280	300	388			210	318	290			278	292	284						315	214	184			285	299	262			379	330	296						141	230	192			279	452			153	109
	293	309	414			234	356	320			307	344	331						318	238	205			310	322	273			443	388	334						140	245	189			252	461			175	124
	297	309	430			264	405	360			357	408	390						321	260	227			312	327	264			486	447	379						151	263	191			233	454			206	148
	290	305	428			301	459	402			412	479	455						339	295	264			319	335	262			562	521	447						166	282	197			222	435			243	177
	274	281	408			343	512	454			476	552	527						365	336	303			305	315	259			620	595	519						188	304	207			225	411			285	216
	264	262	383			389	567	499			531	626	592						414	389	360			297	304	233			712	672	599						214	325	217			233	377			334	261
	236	240	346			438	619	549			584	682	650						467	431	400			283	284	218			777	724	650						242	344	231			238	339			386	304
	213	215	304			483	658	595			636	716	692						512	455	425			261	261	199			802	762	680						267	362	247			252	303			429	343
	195	193	271			515	684	631			656	726	714						558	470	439			248	242	185			815	779	690						291	372	259			274	264			458	371
	172	173	241			529	691	640			657	718	708						561	458	423			224	213	165			761	762	664						307	375	276			322	232			462	381
	154	155	216			524	676	620			638	686	678						534	426	392			196	185	145			677	700	609						317	370	286			401	205			448	375
	138	140	198			503	637	591			596	638	627						510	405	366			187	169	133			624	636	557						319	354	287			491	188			416	363
	125	125	186			460	584	550			548	584	568						469	371	330			171	151	123			547	561	493						311	330	282			560	176			374	339
	116	118	180			420	525	501			497	524	498						438	344	300			167	145	118			495	500	438						300	301	272			591	173			329	308
	112	112	175			371	464	448			439	458	425						429	341	284			174	147	123			472	450	396						283	276	256			593	177			287	273
	110	111	178			322	402	397			390	399	358						402	313	261			177	147	125			413	413	374						266	252	238			561	188			246	238
	113	112	186			270	357	350			341	346	299						374	292	241			188	152	130			377	370	346						246	229	220			511	200			205	201
	118	118	199			230	314	315			305	306	255						342	269	222			188	155	134			335	333	322						223	211	198			449	214			173	163
	129	127	217			199	289	286			279	270	224						336	268	216			206	169	145			331	319	319						201	196	181			380	225			146	133
	137	138	239			178	273	260			278	249	200						328	263	210			221	180	151			315	302	313						183	185	167			323	239			126	109
	145	146	255			165	261	246			253	265	187						322	261	208			231	189	155			308	295	306						164	182	157			267	254			113	96
	152	155	268			162	258	247			248	226	184						330	271	216			240	202	160			324	300	321						151	181	152			225	267			109	91
	154	162	270			171	259	256			242	232	223						331	272	221			236	198	156			334	313	332						141	185	149			190	283			110	90
	155	162	266			183	271	270			239	247	208						340	277	230			232	196	151			353	329	352						135	192	149			171	293			122	95
	149	157	264			203	289	294			248	274	237						344	271	230			217	182	141			361	343	367						134	203	154			162	299			140	105
	141	152	238			222	310	329			251	304	272						383	287	250			222	185	144			399	385	406						137	211	162			161	303			163	120
	132	144	223			242	329	366			259	342	309						398	282	254			196	165	133			413	412	432						144	220	168			167	296			188	142
	137	135	202			258	351	406			267	376	346						411	279	258			180	149	122			428	434	445						153	233	182			180	287			217	168
	110	127	183			278	372	440			278	403	374						421	271	260			162	133	113			426	436	440						165	243	196			198	271			243	196
	100	118	166			296	392	463			303	423	397						430	272	268			156	125	108			416	438	430						178	253	209			221	254			269	221
	93	111	152			314	402	470			333	433	406						419	256	261			141	112	100			379	421	398						191	266	220			248	234			288	240
	84	103	140			323	398	471			351	429	409						422	260	262			137	106	97			378	417	381						200	277	229			276	215			298	252
	78	97	131			326	392	460			356	422	399						393	240	242			125	95	92			341	386	346						207	278	234			310	194			295	256
	73	91	123			319	378	441			346	409	385						388	235	233			123	91	89			335	370	322						211	273	238			342	174			286	251
	69	87	119			308	354	410			328	392	362						356	218	214			116	85	87			302	340	292						212	266	234			376	158			268	241
	73	85	118			285	328	382			301	373	338						331	203	196			113	81	85			274	310	265						210	246	226			406	149			247	227
	68	83	116			263	302	348			273	351	313						311	194	183			115	82	88			255	283	243						208	228	215			423	141			224	210
	68	86	118			239	277	321			246	334	291						292	181	168			115	82	88			228	264	224						202	210	204			431	142			199	191
	72	88	126			218	248	296			223	312	265						269	173	159			120	86	90			209	244	211						193	193	189			421	145			177	170
	76	92	134			200	226	278			204	296	243						263	173	158			126	91	95			212	241	212						181	178	177			405	154			157	150
	80	95	141			180	211	261			189	283	226						249	174	154			128	98	97			210	234	214						171	166	162			379	165			138	130
	98	99	146			163	199	252			175	276	211						239	174	156			126	100	98			217	237	223						160	156	152			340	174			124	112
	87	101	147			153	196	244			167	264	204						256	197	170			137	111	104			256	261	255						151	148	137			300	182			112	97
	88	101	148			147	196	241			162	263	204						252	207	178			131	112	102			269	278	286						139	143	127			261	186			105	86
	87	101	145			142	199	242			168	268	209						248	216	188			125	110	99			291	293	309						132	141	119			224	190			104	82
	85	98	143			141	205	249			177	275	219						258	231	201			124	109	98			327	316	341						123	138	111			194	194			108	81
	82	94	132			144	216	255			198	286	238						263	239	213			116	105	93			344	326	355						119	139	106			172	195			119	85
	79	91	125			148	230	263			221	302	260						265	244	221			110	99	87			360	329	367						115	141	100			155	197			134	93
	73	85	117			155	249	273			248	316	285						281	256	233			106	94	85			392	339	381						115	148	98			143	198			155	105
	70	81	109			167	266	286			274	326	307						293	261	245			99	88	82			402	354	392						115	154	95			140	193			174	118
	65	77	102			180	284	296			294	327	323						312	270	254			96	85	79			416	369	400						118	163	93			144	187			194	133
	62	72	96			195	297	306			315	331	334						305	256	243			86	75	71			389	363	377						124	171	93			152	180			210	145
	59	92	92			205	303	309			330	333	333						326	262	249			86	74	70			401	382	377						128	181	95			165	172			219	154
	56	66	89			212	307	308			339	332	323						317	244	232			80	68	66			367	367	346						135	189	97			181	164			221	159
	55	63	87			213	306	298			332	326	313						331	243	228			83	70	68			370	357	328						140	193	99			202	151			218	160
	54	61	86			210	298	287			318	319	303						311	219	210			79	65	64			326	330	300						145	199	101			222	141			210	175
	54	61	87			203	283	269			294	306	288						298	203	191			78	64	65			298	302	275						147	200	103			244	128			199	153
	54	62	87			192	263	252			270	293	278						282	187	176			80	64	65			269	274	248						150	195	105			264	119			185	147
	55	64	90			182	239	236			247	276	263						260	169	158			80	64	64			242	249	224						150	189	106			282	115			170	136
	56	65	92			168	213	221			220	256	252						253	162	149			85	68	68			230	232	210						148	178	106			294	113			156	128
	57	67	93			161	193	213			199	240	241						244	156	143			97	78	75			224	225	208						144	167	104			303	112			141	118
	59	69	95			152	174	201			179	226	229						232	147	135			92	78	73			210	211	187						142	158	101			304	114			128	110
	60	72	96			148	162	195			163	217	217						210	140	126			92	79	72			194	202	181						138	148	97			297	117			117	102
	62	73	95			141	149	192			153	214	209						204	139	125			94	80	74			198	201	177						134	140	91			284	122			107	94
	62	74	94			137	142	194			144	237	205						193	134	122			93	82	73			195	199	171						127	134	87			260	125			99	87
	61	75	91			134	138	201			139	227	203						188	132	123			107	82	72			197	201	172						124	129	82			237	133			94	80
	61	73	89			139	139	214			138	241	205						193	137	130			94	83	73			211	210	179						118	126	79			210	135			93	74
	65	73	87			143	143	230			142	253	209						191	138	141			89	80	70			213	222	193						113	121	75			187	139			96	71
	64	71	83			154	150	249			148	265	217						192	145	148			90	77	68			221	235	209						109	120	74			167	141			103	71
	60	69	81			170	159	266			153	273	227						188	148	155			86	74	65			230	250	223						106	118	74			151	139			112	74
	55	67	77			175	169	282			159	280	242						186	153	160			81	69	63			231	265	235						102	120	74			138	133			123	80
	53	64	75			187	181	293			172	284	255						180	152	161			78	64	59			227	265	235						101	120	77			133	131			135	88
	51	62	72			199	194	302			187	285	265						189	161	173			81	64	60			239	273	238						100	123	79			129	128			145	96
	49	59	70			206	205	305			208	284	269						187	162	175			76	61	57			229	271	235						100	126	84			129	125			152	105
	47	58	68			208	214	304			231	277	268						194	163	174			78	59	56			229	259	225						101	130	91			132	121			157	111
	46	56	68			206	221	299			248	271	259						200	161	176			75	57	56			224	256	219						104	134	97			142	113			158	113
	47	55	69			204	222	287			259	262	249						208	160	176			76	57	55			218	245	209						108	138	103			153	107			155	112
	45	55	68			196	221	270			260	255	238						208	153	166			76	56	58			205	228	197						110	139	108			168	103			150	109
	45	55	71			186	211	251			249	248	225						205	144	157			74	55	55			187	213	182						113	141	112			184	100			142	107
	45	55	72			174	201	233			235	238	214						210	143	153			78	59	58			181	205	176						114	140	116			202	97			133	102
	45	56	72			162	185	213			217	229	204						203	136	146			79	59	58			166	191	165						115	136	117			209	94			123	99
	46	58	73			149	167	194			200	219	195						193	129	135			79	61	58			153	179	159						116	131	116			217	94			116	94
	46	58	75			138	155	182			183	211	188						183	124	129			78	60	58			145	165	152						116	126	116			219	93			107	90
	47	60	75			129	140	170			168	205	181						180	124	128			79	61	59			147	163	152						115	120	111			216	95			99	85
	47	60	76			123	127	164			156	200	178						179	127	128			80	63	62			150	159	158						113	115	105			207	99			93	80
	47	61	76			119	122	158			147	197	177						177	132	129			79	65	61			158	162	172						112	110	100			198	99			88	76
	47	60	75			113	117	159			137	193	178						174	137	132			78	65	59			168	168	186						109	106	94			187	101			85	72
	48	61	75			112	115	160			133	192	179						177	147	142			79	67	61			193	185	210						106	103	89			175	106			85	70
	48	61	73			112	113	163			130	190	186						179	156	149			79	67	59			210	204	232						103	101	84			162	108			85	67
	48	59	73			113	116	170			134	190	194						171	156	148			76	64	58			216	217	243						102	99	80			152	113			88	66
	46	58	71			114	122	174			137	195	203						168	157	149			73	62	55			223	231	250						99	97	75			143	115			91	65
[truncated: 17 more columns]

## Sheet: SFig7_B_Period
Period Calls				set1	swd3	set1swd3	WT		Average					Standard Deviation					Bar Graph plots average plus/minus standard deviation
Each Biological replicate is an average of three technical replicates			Rep1	23.5081	22.9675		21.4905		R code used to average biological replicates		set1_avg	23.93		R code used to calculate standard deviation between biological replicates		set1_sd	0.447049
			Rep2	23.8835	25.0804		22.213				swd3_avg	24.0268				swd3_sd	1.22257
			Rep3	24.3985	22.9686	24.0151	22.1187				set1_swd3_avg	24.8194				set1_swd3_sd	1.13743
			Rep4		25.0908	25.6237	22.3229				WT_avg	22.0363				WT_sd	0.373292

## Sheet: SFig7_C_Traces
	Time Points	set1_0g0a_T1_R1	set1_0g0a_T2_R1	set1_0g0a_T1_R2	set1_0g0a_T2_R2	set1_0g0a_T1_R3	set1_0g0a_T2_R3	set1_0g0a_T1_R4	set1_0g0a_T2_R4	set1_05g_T2_R1	set1_05g_T1_R2	set1_05g_T2_R2	set1_05g_T1_R3	set1_05g_T2_R3	set1_05g_T1_R4	set1_05g_T2_R4	WT_0g0a_T1_R1	WT_0g0a_T2_R1	WT_0g0a_T1_R2	WT_0g0a_T2_R2	WT_0g0a_T1_R3	WT_0g0a_T2_R3	WT_0g0a_T1_R4	WT_0g0a_T2_R4	WT_05g_T1_R1	WT_05g_T2_R1	WT_05g_T1_R2	WT_05g_T2_R2	WT_05g_T1_R3	WT_05g_T2_R3	WT_05g_T1_R4	WT_05g_T2_R4	swd3_0g0a_T1_R1	swd3_0g0a_T2_R1	swd3_0g0a_T1_R2	swd3_0g0a_T2_R2	swd3_05g_T1_R1	swd3_05g_T2_R1	swd3_05g_T1_R2	swd3_05g_T2_R2	set1swd3_0g0a_T1_R3	set1swd3_0g0a_T2_R3	set1swd3_0g0a_T1_R4	set1swd3_0g0a_T2_R4	set1swd3_05g_T1_R3	set1swd3_05g_T1_R4	set1swd3_05g_T2_R4
0g0a denotes low nutrient media	0	-8.2	-5.775	5.05	3.55	2.225	6.375	-1.625	0.1	-35.625	-5.1	0.1	4.075	11.225	3.5	3.9	-8.1	-10.425	2.85	3.75	5.15	2.05	0.925	-0.075	-29.85	-28.9	3.075	-4.5	3.9	29.175	3.225	3.375	-10.85	3.05	3.05	6.6	-40.175	-36.1	3.7	5.15	2.575	2.825	2.1	1.1	3.15	4.175	6.575
05g denotes high glucose media	1	0.675	2.225	3.525	3.175	2.25	6.05	-1.45	-0.7	-5.725	1.7	8.275	4.6	0.35	3.7	3.7	-1	-0.3	2.475	3.5	3.55	2	0.45	-0.4	-2.9	-2.65	3.35	-3.175	4.05	19.825	2.275	3.925	-0.25	2.425	2.55	4.35	-7.6	-8.075	6.325	6.65	3.425	2.7	0	-0.925	3.975	5.5	5.425
RaceTubes were run under a CCD camera	2	1.85	2.4	3.8	3.375	3.275	6	-1.175	-0.725	-4.25	-3.7	1.925	2.35	-6.55	3.2	4.4	0.275	1.025	3	3.75	6.775	3.225	0.1	-0.375	-1.85	-1.325	3.35	0.175	3.15	9.325	3.475	4.85	1.125	1.65	4.075	5.8	-5.9	-5.75	4.575	4.975	2.125	1.55	-0.05	-1.025	2.525	4.925	5.85
Two technical replicates were present in each run	3	1.825	2.3	4.1	4	2.85	6.45	-0.75	0.3	-3.75	5.3	2.075	5.25	-9.025	2.6	1.95	0.4	2.15	2.775	2.65	6.1	2.65	0.5	-0.1	-0.3	0.1	3.95	9.7	4.875	9.975	2.825	3.275	1.7	1.55	4.45	6.1	-5.4	-5.1	7.075	6.675	2.575	2.85	0.95	-0.625	3.875	4.625	4.2
two camera runs (ie, biological replicates) were done for swd3 and set1swd3 (controls of WT and set1 were present for all four runs)	4	1.875	2.3	5.35	4.525	3.075	6.525	-0.15	0.425	-2.5	5.75	1.525	4.45	-3.875	3.35	3.15	0.45	1.15	3.875	2.975	6.85	3.475	0.325	-0.15	-0.15	0.5	3.825	5.025	4.55	11.45	4.075	4.475	1.025	2.125	3.5	5.2	-4.1	-5.075	6.6	5.8	3.025	2.95	1.825	0.525	3.675	4.875	6.3
T1_R1 is technical replicate 1 of biological replicate 1	5	1.625	2.3	3.525	3.5	3.625	6.125	-0.975	0.75	-2.6	-0.225	2.025	5.2	-7.3	2.975	3.075	0.05	1	1.35	1.95	5.1	2.05	0.175	-0.2	0	0.6	3.95	12.725	5.375	9	5	5.075	1.025	1.3	3.7	5.525	-3.95	-4.55	7.05	6.525	2.225	1.975	1.125	0.475	3.875	5.125	6.45
T2_R1 is technical replicate 2 of biological replicate 1	6	1.55	3.175	3.6	4.75	3.65	7.2	-0.375	0.4	-2.3	14.375	1.95	6.075	-7.25	2.8	2.55	-0.4	1.775	2.275	2.875	6.375	3.1	-0.225	0.55	0.875	0.675	4.525	18.025	6.925	7.975	4.65	4.525	0.575	2.225	4.075	7	-3.925	-4.625	7.3	6.525	3.025	2.775	0.775	0.175	3.825	4.35	6.85
R2 is biological replicate 2	7	1.85	2.4	1.575	1.575	3.625	7.125	0.4	-0.325	-1.775	3.225	1.05	5.675	-7	3.35	3.8	-0.7	1.2	0.45	1.35	6	3.075	0.15	0.05	2.275	2.225	4.25	7.475	8.05	8.25	6.925	6.825	1.075	1.5	3.9	5.85	-3.35	-3.3	7.5	6.85	2.625	2.575	1.1	0.6	3.05	6.55	7.325
R3 is biological replicate 3	8	1.6	1.95	0.725	1	4.275	7.025	-2.05	0.625	-1.7	1.55	1.025	6.45	-8.725	3.65	3.6	-0.025	1.075	0	-0.225	6.05	2.725	0.425	0.875	3.8	5.025	5.875	9.8	11.9	8.375	9.675	9.4	0.95	2.225	4.925	6.8	-3	-3.15	8.6	8.525	0.7	0.55	1.225	0.925	3.825	7.525	7.625
R4 is biological replicate 4	9	1.775	2.9	1.575	1.175	4.125	7.1	0	0.325	-0.725	-0.65	2.1	6.725	-8.3	4.225	4.625	0.625	2.6	1.05	0.375	6.475	4.225	1.275	-0.125	7.975	9.9	9.65	22.4	17.075	13.575	15.9	13.825	1.075	2.425	4.825	7.35	-1.65	-1.125	8.625	8.7	1.125	1.2	1	0.675	3.425	6.625	8.825
	10	2.475	3.05	0.75	1.575	4.3	8.875	-0.575	0.025	0.15	3.575	3.1	7.225	-7.675	4.05	4.625	1.625	3.025	0.575	-1.15	7.35	4.925	0.975	0.9	14.525	17.275	18.325	44.075	29.55	24.15	24.65	23.775	1.95	2.5	5.75	8.825	-1.4	-0.625	9.175	9.25	1.775	2.075	1.65	0.775	4.35	7.55	8.95
Two racks of race tubes per camera run	11	2.625	3.8	1	1.275	4	10.075	-1.4	-0.5	0.45	4	3.4	8.8	-5.85	5	5.675	2.1	3.85	4.075	1.725	9.3	5.275	0.55	0.95	26.05	29.65	32.025	69.85	52.5	39.65	41.125	40.3	2.2	2.925	5.175	9.825	-1.025	-0.15	9.35	9.8	1.025	1.675	1.675	0.825	4.5	7.825	10.225
one rack with low glucose media	12	3.825	5.025	1.975	2.4	5.4	14.45	-1.325	0.075	3.1	6.525	4.15	9.85	-1.65	5.825	7.1	3.425	5.975	3.85	2.95	12.35	7.6	1.2	1.9	45.075	49.45	53.625	102.75	92.375	69.95	66.525	70.475	3.35	4.5	7.475	12.85	1.95	2.45	10.425	11.525	3.175	4.45	2.325	2.825	6.375	10.45	12.575
one rack with high glucose media	13	5.4	6.7	3.375	4.15	6.8	20.775	-0.075	1.7	6.75	9.375	6.575	13.4	0.175	7.1	9.525	5.025	6.8	5.25	4.175	15.05	8.825	2.35	3.775	72.975	77.65	84.9	140.5	154.425	121.125	101.75	114.425	5.525	6.975	10.125	18.825	5.775	4.6	14.325	14.625	4.275	7.275	5.525	6.575	7.25	13.275	16.775
	14	7.025	8.35	4.5	6	8.775	28.775	0.95	3.5	11.325	15.75	8.875	15.925	2.4	9.675	13.05	6.025	8.375	7.825	6.275	18.65	12.35	3.525	6.2	113.3	112.5	125.675	180.475	235.4	190.6	148.55	164.425	7.65	9.675	14.6	27.35	10.725	9.65	17.225	18.325	6.75	10.075	9.025	9.825	9.15	17.05	20.525
	15	9.225	10.575	6.3	9.025	11.075	38.6	0.65	4.775	20	22.55	14.25	22.85	8.525	12.875	17.125	7.175	9.35	11	8.35	24.275	14.425	4.375	7.875	160.8	152.95	169.65	214.925	321.7	275.85	206.05	217.35	10.275	12.6	18.55	38.5	19.675	16.525	22.75	25.375	9.7	13.75	12.1	12.625	11.775	23.6	27.675
	16	11.1	14.025	9.375	13.1	14.15	51.125	2.4	6.575	30.2	31.4	21.725	29.875	19.575	16.55	23.3	8.275	10.25	12.5	10.75	28.675	17	4.15	8.575	211.525	194.8	209.65	237.05	392.65	353.8	267.175	269.8	12.9	16.9	24.25	50.775	28.025	25.6	26.95	31.125	14.875	16.875	15.3	15.325	17.025	32.8	36.4
	17	14.875	15.95	12.525	17.15	17.775	62.95	3.15	8.625	41.175	41.475	29.85	37.475	25.75	19.85	28.325	8.875	10.325	14.4	12.05	31.2	17.95	5.3	10.825	253.9	231.2	243.875	255.2	441.325	403.15	322.35	313.725	14.275	20.15	30.75	62.125	39.925	34.875	34.025	37.9	19.475	20.15	18.75	20.05	23.425	42.55	46.15
	18	16.65	17.2	16.65	22.3	20.95	71.725	3.65	8.625	53.35	51.15	41.7	45.6	36.425	25.475	35.4	8.55	10.9	16.8	13.25	31.875	18.875	5.975	12.05	282.575	252.8	266.125	266.7	459.5	433.975	366.075	352.55	20.625	22.875	36.175	72.4	50.6	45.675	41.075	44.35	24.825	23.6	23.1	22.25	31.225	53.45	59.075
	19	17.725	19.125	18.85	24.075	21.9	77.975	4.15	9.475	64.25	58.475	51.95	54.15	46.2	28.625	41.275	8.4	10.325	15.55	12.1	30.7	18.675	4.975	12.575	295.425	274.925	285.575	272.275	454.55	442.2	386.8	373.625	22.9	25.575	40.275	78.4	61.05	53.7	48.725	52.375	28.225	24.525	25.65	25.85	40.275	61.45	67.925
	20	17.325	19.375	20.425	25.325	23.35	76.5	4	9.475	73.625	66.7	59.825	60.7	56.675	33.075	48.525	7.35	10.1	14.925	11.125	28.225	17.8	4.4	11.95	283.55	290.35	298.125	268.85	436.725	429.275	392.25	391.025	22.65	27.375	40.6	77.325	69.3	63.25	56.4	60.175	30.5	25.775	27.425	28.15	49.775	71.425	78.7
	21	17.75	18.175	21.175	25.975	22.75	73.475	4.55	9.975	81.425	70.25	68.825	68.425	66.725	36.725	53.675	6.45	9.225	15.675	11.625	27.1	17.075	5.25	12.225	268.3	292.625	308.075	267.05	390.775	400.375	381.275	393.825	22.8	27.375	39.575	72.95	76.375	68.75	64.025	66.875	32.05	26.9	27.125	28.25	59	76.75	88.325
	22	16.325	17.45	22.025	25.875	21.125	69.25	3.775	8.55	85.25	77.925	76.45	74.55	72.525	39.375	57.15	6.075	8.6	13.95	11.7	25.1	16.25	4.875	10.725	234.925	276.6	302.2	266.575	344.05	361.4	359.75	394.25	20.9	26.1	36.975	65.275	82.525	74	69.975	72.25	33.175	28.1	26.4	27.225	66.85	81.25	94.025
	23	15.225	15.4	21.475	24.925	19.925	64.875	3.125	9.225	87.475	82.65	81.925	78.75	76.65	42.1	61.3	5.2	7.775	13.875	11.625	23.75	15.725	4.375	9.575	207.025	252.775	291.35	258.475	320.975	319.5	336.3	382.85	20.425	25	33.6	59.475	84.75	76.65	75.275	76.325	31.925	25.55	24.65	26.725	73.875	83.775	100.25
	24	14.525	14.325	21.65	25.45	17.875	58.575	3.1	7.975	90.175	89.05	87.55	81.575	83.2	43.625	60.975	5	7.425	13.3	11.45	22.4	14.575	3.725	9.15	191.175	237.7	271.075	259.35	310.175	294.15	314.025	365.75	19.125	21.925	31.15	53.15	87.925	79.75	79.275	78.325	29.9	25.5	22.375	23.8	80.875	86.3	102.6
	25	13.325	12.9	21.675	23.05	16.675	55.1	1.625	6.675	91.275	93.8	91.35	83.325	84.7	43.75	61.375	4.625	6.625	12.525	11.9	20.8	13.925	3.6	7.525	182.6	226.95	253.675	278.7	301.625	278.625	295.475	357.925	17.525	20.4	29.55	49.525	90.45	80.925	85.05	80.275	28.325	23.225	19.975	21.05	85.6	87.45	104.5
	26	13.325	12.75	20.9	22	15.475	51.2	1.725	6.8	93.25	100.2	93.525	81.8	91.45	45.15	62.15	4.85	7.05	11.95	10.3	18.2	13.1	3.4	7.05	186.15	234.475	246.775	310.725	295.85	275.35	290.4	360.95	16.925	17.825	26.375	44.5	90.525	83.05	85.475	80.65	25.475	21.85	17.625	19.575	90.775	88.725	105.75
	27	12.35	11.85	20.4	20.275	14.825	48.4	1.025	5.5	94.775	102.975	96.05	83	93.625	46.95	62.15	4.225	6.7	10.175	10.45	17.725	13.275	2.825	5.9	197.5	251.325	240.175	357.875	302.55	282.2	293.275	366.6	15.8	16.175	24.15	40.1	90.925	85.575	87	87.65	22.35	20.675	17.05	16.3	92.45	89.375	106.65
	28	11.675	12.25	19.225	19.175	13.575	45.225	1.6	5.975	96.2	107.525	99.3	81.2	95.975	46.875	61.975	4.175	6.3	9.975	11.1	16.1	12.3	3.475	5.875	215.425	278.875	252.875	424.25	317.725	307.15	311.525	384.925	14.55	15.525	21.325	36.375	90.525	86.5	87.725	86.375	21.375	19.5	15.55	15.7	96.75	90.775	107.275
	29	11.65	10.5	19.9	17.825	12.675	42.875	0.575	2.1	98.475	112.525	105.2	82.775	98.325	47.75	62	3.825	6.15	8.55	9.375	15.25	11.925	2.65	2.9	246.8	320.875	280.05	513	345.725	354.275	352.325	417.65	12.85	13.725	19.7	34.2	88.75	86.6	89.15	85.975	19.125	18.575	10.775	11.525	99.9	90.275	107.125
	30	11.025	10.15	18.475	17	12.575	41.25	1.8	5.7	99.375	116.1	110.05	78.725	100.05	47.925	63.375	4.625	6.8	8.875	9.2	14.3	13.075	0.825	4.075	294.15	373.1	322.025	609.6	400.125	429.475	423.8	471.9	11.9	12.075	18.625	31.175	87.5	85.9	92.725	88.1	18.15	16.625	12.25	12.85	103.225	93.95	108.6
	31	11.325	10.45	17.25	14.45	11.875	38.55	0.55	5.6	101.125	118.45	115.45	86.4	103.025	49.8	63.85	6.05	7.825	7.95	8.65	15.15	14.525	1.925	4.675	359.025	438.35	385.7	723.15	479.425	530.925	532.05	564.375	10.85	11.675	17.1	28.825	88.45	86.2	96.425	90.175	15	15.975	10.275	11.425	108.35	95.15	109.025
	32	11.35	9.15	17.925	17.225	10.95	37.75	1.025	5.6	102.7	122.025	120	88.975	107.65	51.725	66.575	7.475	11.35	9.525	10.95	18.025	15.5	2.75	5.75	433.85	523.225	462.575	854.625	578.725	644.175	668.1	684.925	10.1	10.95	16.8	27.6	88.975	85.6	98.475	95.625	14.975	15.525	9.825	10.8	112.5	96.575	112.2
	33	11.1	9.625	16.575	13.875	11.375	36.475	1.25	6.6	104.05	131.7	129.5	91.225	114.1	53.2	70.325	7.85	12.75	11.075	14.675	21.7	20.675	3.2	7.85	497.675	611.575	561.25	981.225	700.2	773.95	811.825	848	10.325	10.125	15.225	26.175	88.325	84.275	104.6	96.4	13.9	14.825	9.55	10.7	118.425	98.625	115.85
	34	10.925	9.7	17.875	14.425	10.875	37.475	1.875	6.9	107.15	139.475	136.4	93.075	122.25	54.325	71.5	8.625	13.925	15.825	18.625	27.525	23.675	3.45	9.375	545.1	689.2	662.55	1087.58	840.825	899.75	941.425	1038	10.05	9.75	14.975	26.15	91.25	84.45	110.75	101.425	13.675	13.125	9.875	9.975	124.2	98.925	119.6
	35	12.175	10	18.475	14.9	13.05	42.925	2.35	8.55	112.4	148.875	145.325	95.525	132.35	59.25	79.75	9.85	15.875	19.5	23.5	32.95	27.125	3.75	10.775	578.925	759	749.45	1151.53	970.4	1004.27	1061.75	1220.88	10.9	10.875	17.375	29.6	97.65	85.7	118.95	108.2	14.75	15.65	10.5	11.675	133.35	106.425	131.35
	36	14.35	12.275	18.225	15.975	15.3	52.775	4.725	10.425	120.775	162.55	156.25	98.825	143.375	62.075	84.8	11.625	17.5	25.825	26.15	40.9	30.725	6.25	13.9	593.275	807.525	822.4	1167.85	1057.28	1068.38	1135.7	1353.55	13.05	13.25	20.25	35.425	105.95	88.8	129.375	116.825	16.25	15.2	13.2	15.675	142.225	110.95	140.8
	37	17.175	14.05	22.125	18.85	17.725	65.75	7.025	14.4	133.15	175.325	171.525	105.825	162.05	65.65	93.575	12.45	18.85	32.65	32.325	48.9	34.675	6.375	17.825	595.45	804	845.55	1139.47	1091.3	1098.12	1144.62	1431.17	16.125	17.1	24.7	48	115.8	93.1	141.525	130.15	20.575	18.275	19.15	22.475	155.95	119.325	154.25
	38	23.025	19.1	27.55	23.775	24.825	86.95	9.975	17.475	148.675	195.425	184.85	114.575	184.825	71.925	104	13.4	20.075	39.925	38.25	57.475	37.15	7.625	21.3	571.225	772.25	829.175	1068	1068.15	1075.72	1105.78	1446.03	23.375	24.775	34.3	66.9	129.3	97.8	157.3	141.9	26.7	22.8	25.9	30.5	168.85	130.825	171.65
	39	29.8	22.65	34.3	29.925	31.075	111.2	14.9	22.175	166.325	219.8	204.925	128.225	209.2	79.55	114.875	13.95	20.575	47.275	42.75	61.825	37.15	8.675	24.6	526.5	707.025	781.05	939.175	996.85	1003.08	1043.83	1385.42	30.1	31.75	44.175	87.8	148.1	106.375	175.975	157.825	33.65	28.4	34.25	40.75	182.5	144.9	191.975
	40	38.975	28.65	44.075	39.025	39.1	136.7	20.175	27.45	186.05	244.675	226.725	145.55	238.375	88.05	127.525	14.175	20.95	50.9	46.675	64.075	37.675	9.825	26.825	455.125	602.4	716.075	809.525	895.85	906.875	959.9	1269.53	39.175	41.6	58.725	114.2	169.1	116.7	198.7	179.25	43.175	36.95	43.85	50.25	201.75	162.9	211.1
	41	45.8	34.9	58.05	52.3	46.25	158.25	22.925	32.475	206.225	275	251.4	164.425	268.975	101.35	143.175	13.85	20.55	53.175	47.025	60.9	35.425	9.275	25.7	377.15	478.325	636.475	699.125	783.425	800.875	847.6	1137.97	46.575	49.3	69.3	139.025	194.75	129.325	221.65	204.85	51.925	45.85	53.5	59.25	219.725	183.65	233.175
	42	51.85	38.85	70.15	62.6	50.25	173.675	26.525	38	224.7	301.075	280.775	185	293.05	112.475	157.9	12.625	19.275	50.625	44.375	56.125	33.925	9.075	23.7	310.275	377.075	560.725	611.725	684.25	692.2	722.5	1005.12	53.725	53.775	78.35	156.8	219.375	143.125	245.25	230.625	61.225	55.55	63.125	66.925	238.475	204.85	256.125
	43	53.9	43.525	82.6	74.4	53.15	178.875	29.425	42.2	236.35	330.525	312.8	203.625	316.475	125.75	172.175	12.375	18.85	47.325	43.025	49.6	32.675	8.7	22.625	265.95	317.225	493.175	557.425	610.325	599.325	612.3	889.15	58.175	59.6	84.125	164.15	237.8	155.825	265.9	254.95	69.425	63.35	70.85	72.45	261.5	224.625	276.35
	44	54.1	44.6	91	82.175	53.65	176.775	29.975	44.4	243.275	356.625	342.25	221.475	332.125	139.15	189.45	11.725	17.725	43.65	40.85	42.95	29.35	8.35	21.175	242.6	280.025	436.825	507.4	553.15	538.375	537.85	790.45	59.775	62.425	85.475	161.95	246.65	166.5	283.225	275.825	74.95	66.8	74.025	72.725	282	243.1	292.575
	45	55.05	45.175	95.3	85.525	52.175	167.675	30.6	45.325	241.25	373.45	367.275	230.875	343.3	149.575	203.5	11.975	17.425	37.95	36.9	37.45	28.2	6.625	18.475	229.7	254.325	400.925	479.175	521.6	499.35	476.925	721.525	59.275	60.725	81.3	153.625	245.9	170.925	294.6	296.3	77.075	69.5	72.925	71.45	300.775	253.025	304.4
	46	52.025	43.6	94.85	84.575	48.45	155.3	28.55	43.1	236.725	379.525	387.55	236.4	349.725	159.1	213.525	11.95	16.575	33.4	35.425	33.825	26.075	4.925	16.1	223.375	245.95	377.05	469.75	508.85	476.525	440.9	666.6	56.35	56.9	76.025	138.7	231.95	170.325	297.95	312.45	76.025	68.95	66.925	67.95	319.6	258.75	310.925
	47	48.525	41.925	91.475	78.85	44.3	139.525	27.95	42.75	231.95	387.225	400.375	240.725	352.3	167.25	222.5	10.875	15.7	30.25	31.175	29.25	24.075	6.375	14.45	227.025	243.2	368.275	476.375	499.9	476.4	423.65	627.35	52.425	51.4	69.5	120.65	208.575	164.7	293.475	324.8	72.275	66.975	60.825	61	336.425	260.575	312.625
	48	44	37.6	86.7	73.2	40.375	125.45	25.975	39.9	226.35	385.125	406.275	240.925	344.775	171.775	223.6	9.375	12.85	28.55	28.275	26.5	23.125	4.825	13.8	238.2	246.9	359.025	488.275	502.1	488.725	420.525	603.625	44.5	45.425	62.825	103.925	185.5	152.625	286.2	328.675	67.55	61.05	52.525	55.375	346.675	257.375	310.15
	49	41.725	34.95	79.8	64.65	36.475	112.65	24.675	37.375	222.45	376.6	407.15	240.05	335.15	173.2	222.65	9.75	14.45	24	26.3	25.275	21.5	5.775	11.375	258.075	258.45	358.175	510.575	516.25	509.9	433.15	599.5	40.375	40.05	56.825	87.85	167.525	143.6	277.2	322.55	61.3	54.725	44.875	49.925	353.25	250.625	302.1
	50	38.55	31.375	71.625	56.5	32.05	100.1	24.15	35.525	220.8	362.8	396.725	234.75	323.175	171.2	220.35	9.425	13.125	21.1	24.25	22.9	19.8	4.475	10.4	289.75	281.1	366.55	542.85	542	552.175	465.75	609.975	33.825	35.825	50.775	75.975	153.275	136.175	269.85	312.375	54.275	48.975	37.325	44.1	351.2	245.775	289.75
	51	35.95	28.55	63.55	48.45	29.05	91	21.075	33.45	217.225	350	381.475	231.3	309.45	169.475	215.275	9.025	12.85	19.625	21.425	22.575	19.525	4.65	8.675	333.025	314.525	384.05	592.3	606.15	613.75	518.65	644.925	29.75	30.05	44.625	66.775	143.225	126.55	259.075	301.275	46.875	43.875	31.2	38.45	342.725	236.925	276.55
	52	33.25	26.1	57.425	42.15	26.425	81.375	19.875	29.425	212.35	334.35	364.525	224.875	296.925	167.95	209.975	9.6	13.675	17.475	20.925	21.9	19.825	4.05	8.8	391.1	357.575	416.375	655.8	697.725	699.975	592.525	709.475	25.55	27.1	38.55	57.8	137.55	119.625	245.125	285.35	41.475	38.1	25.575	32.725	331.1	227.125	265.35
	53	30.95	24.125	49.625	36.8	23.95	72.925	17.25	27.75	205.925	320.325	350.575	217.875	286.475	164.95	207.375	11.4	16.25	17.325	19.3	22.1	22.125	3.875	7.825	453.875	408.3	465.65	726.075	823.7	794.225	687.4	800.7	22.825	23.225	34.5	50.6	135.6	114.475	231.275	269.375	36.825	34.8	21.55	30.125	318.675	217.7	254.05
	54	43.2	37.9	44.8	32.675	21.25	67.65	15.875	27.975	211.125	310.075	338.1	208.7	276.3	162.3	204.725	18.925	32.325	17.075	21.325	26.575	26.175	4.25	10.95	531.425	469	519.475	800.025	976.5	891.175	804.225	915.85	39.65	35.95	29.7	45.45	145.7	120	217.625	251.35	33.05	31.775	18.825	25.875	303.55	209.325	245.225
	55	26.55	20.175	41.075	29.775	19.75	64.025	13.375	25.65	192.825	299.8	324.75	202.1	266.95	159.825	203.625	17.025	24.425	22.125	26.3	33.9	33.8	5.2	13.975	572.6	500.925	577.55	860	1127.45	983.6	937.95	1040.75	17.55	18.725	27.85	42.15	134.075	107.7	209.7	239.475	29.65	29.4	16.525	24.025	290.775	201.825	238.25
	56	24.525	19.225	37.3	28.275	17.725	62.925	12.5	25.225	188.8	296.525	310.75	195	258.375	156.25	199.425	20.225	29.4	28.1	35.1	42.6	41.925	4.7	18	606.275	533.075	633.45	897.4	1238.88	1065.05	1064.6	1158.95	15.85	16.75	26.225	38.05	133.725	106.775	201.45	224.2	27.25	26.4	15.075	21.325	274.925	194.35	231.35
	57	22.8	18.125	36.725	26.25	17.775	63.625	9.725	22.45	181.05	296.275	301.3	190.35	254.025	152.325	196.075	25.125	35	37.875	44.45	56.7	48.2	6.925	22.1	616.725	537.875	678.85	910.25	1318.92	1102.6	1161	1250.03	14.675	16.975	25.95	38.25	131.6	105.375	196.7	212.725	26.025	24.375	11.925	15.675	267.425	187.7	227.65
	58	23.2	18.275	34.225	25.35	19.95	71.275	13.825	29	176.75	292.4	295.825	188.95	249.725	153.575	194	27.925	41.35	49	54.625	74.275	58.55	8.775	30.1	601.7	526	698.275	887.075	1371.85	1103.33	1210.92	1313.35	15.6	16.35	27.45	41.725	130.15	107	193.275	205.825	25.35	24	15.425	22.35	260.375	184.5	221.5
	59	24.775	18.525	35.075	26.575	21.75	84.475	17.4	32.925	174.25	296.625	293.2	188.075	248.625	153.1	191.025	31.975	48.575	62.625	67.825	92.575	67.1	10.5	39.3	573.275	503.9	696.2	832.05	1369.83	1077.9	1215.55	1339.35	18	18.875	30.575	48.525	127.975	109.325	192.825	203.05	26.625	23.625	17.85	25.875	257.975	179.7	217.925
	60	29.025	20.675	37.55	28.8	28.05	108.55	21.65	39.05	173.475	298.175	289.95	189.25	254	155.9	190.575	35.7	54.75	77.2	82.5	108.675	75.775	14.85	47.75	528.675	478.825	668.25	753.625	1317	1038.78	1169.28	1315.2	22.7	23.35	38.45	63.575	127.55	113.1	192.275	202.525	28.45	25.475	24.525	32.2	253.35	178.775	219.575
	61	36.725	25.85	44.825	35.525	35.825	140.3	25.6	46.65	177.125	303.9	292.55	190.925	259.95	159.575	189.375	39.125	59.075	91.625	95.15	119.15	80.075	17.45	53.425	470.875	443.675	612.375	676.175	1221.53	986.475	1091.97	1261.5	32.125	31.475	52.05	87.05	129.875	119.15	197.1	207.375	34.35	28.425	32.575	41.475	254.075	178.475	221.2
	62	48.5	32.8	54.325	45.625	44.925	181.075	33.2	57.975	182.8	309.7	293.6	198.25	263.3	163.5	189.575	41.825	61.175	96.3	104.025	123.125	82.275	19.075	59.375	413.8	410.5	546.225	606.325	1108.53	927.4	999.5	1166.7	44.725	43.625	69.375	116.975	135.85	122.95	202.55	212.65	43.15	36.1	48.825	57.275	251.9	185.65	223.475
	63	62.825	44.275	70.25	59.8	56.525	226	40.025	69.075	190.625	319.025	294.05	212.2	272.325	166.45	193.225	40.85	60.2	98.825	105	119.575	81.6	22.175	60.6	370.575	376.725	481.4	557.4	978.725	879.275	892.9	1060.85	59.65	59.9	90.625	154.25	143.65	128.1	209.4	219.85	55.325	46.9	65.85	75.2	262.475	190.65	227.05
	64	79.475	56.6	90.9	77.9	68.675	267.75	46.825	80.45	200.875	325.775	299.1	225.95	281.275	172.05	198.1	40.125	58.45	95.3	102.575	112.95	77.3	19	58.6	340.25	355.575	425.05	519	863.8	829.6	783.725	975.575	76.6	79.95	115.175	192.3	155.325	134.875	215.675	231.6	71.45	61.2	82.425	95.6	269.775	199.625	231.8
	65	94.8	68.85	114.9	98.55	78.975	303.575	53.05	90.55	209.7	338.25	309.4	239.95	289.7	181.05	206.1	38.375	54.7	87.95	96.125	101.425	73.45	17.725	54.325	325.075	340.125	376.925	496.6	774.6	783.375	688.525	895.25	90.275	97.35	137.325	228.25	166.175	141.875	226	243.1	88.75	76.025	99.35	114.925	280.675	210.375	239.75
	66	107.175	79.3	142.1	121.55	85.3	324.85	54.2	96.1	220.2	345.35	319.45	254.025	302.625	192.425	215.7	36.275	50.325	78.725	87.775	88.85	65.75	14.6	48.175	315.625	331.075	341.75	480.65	708.4	754.175	618.975	835.65	100.9	109.875	155.375	252.6	176.975	146.7	237.15	256	105.475	91.65	111.7	128.675	292.25	221.7	248.075
	67	116.525	86.425	167.975	142.375	92.225	334	56.575	101.15	226.525	356.275	333.9	267.75	315.25	203	225.025	33.025	46.4	69.175	80.625	81.025	62.625	16.625	44.775	312.375	332.2	316.2	477.975	651.35	736.7	557.85	777.95	110.225	119.95	169.1	269.525	184.4	150.6	245.425	266.175	120.4	106.175	122.975	140.225	305.925	234.05	257.775
	68	122.85	90.325	187.025	157.3	92.55	328.95	53.9	101.8	231.3	364	349.15	283.125	324.125	217.725	236.625	30.6	42.85	59.6	73.025	70.75	57.25	15.45	39.125	318.85	335.4	301.075	477.525	616.35	721.4	517.475	740.9	114.85	122.1	173.95	270.2	187.025	151.05	255.975	278.1	130.925	112.75	124.6	142.525	317.95	246.375	266.825
	69	121.825	91.275	199.075	163.55	91.8	310.425	51.15	99.925	230.875	369.05	365.5	293.225	328.575	231.125	246	28.4	38.85	51.575	64.05	63.025	53.75	14.2	35.625	325.05	337.5	294.1	473.225	596.9	713.6	492.825	708.375	112.45	118.45	173.075	257.275	185.975	150.25	264.7	287.625	135.2	113.2	122.55	139.65	326.8	255.925	273.55
	70	117.75	89.875	199.825	161.5	86.025	281.8	49.175	95.375	228.925	369.85	373.7	299.35	335.6	241.2	253.175	27.025	36.35	46.325	56.6	56.025	48.4	13.325	31.625	342.5	346.6	292.05	476.875	595.3	713.925	484.175	688.65	106.3	110.6	163.625	234.65	181.4	143.775	269.5	295.225	134.6	111.075	116.075	132.575	338.9	264.025	279.375
	71	110.025	84.15	192	153.55	78.75	249.05	45.75	88.825	224.5	370.9	384.9	304.275	340.375	248.275	256.75	25.35	32.3	39.45	50.575	49.6	43.55	13.05	28.4	368.275	360.55	297.1	491.85	610.55	718.925	497.075	683.05	94.875	99.575	146.95	204.75	173.65	137.925	274.275	302.075	130.8	108	103.925	121.325	346.95	269.625	283.225
	72	101.725	77.5	176.425	138.525	70.4	214.375	41.75	81.95	215.9	366.825	389.175	306.95	343.45	252.3	258.925	22.8	30.175	35.225	44.2	44.1	39.975	11.875	25.8	404.55	380.125	310.175	519.15	644.875	732.45	527.45	690.175	82.875	86.825	130.175	172.925	164.575	129.6	274.15	308.375	122.475	100.675	89.9	105.425	350.95	269.95	282.65
	73	92.025	69.625	160.575	123.925	64.4	185.025	36.35	73	209.425	363.4	385.25	305.95	341.475	252.325	256.025	21.875	28.6	32.075	40.075	41.125	38	11	23.1	450.625	410.1	330.775	568.2	707.35	761.075	580.75	709.275	71.4	74.825	112.125	144.85	159.6	122.575	271.475	309.6	113.125	89.775	75.175	88.15	352.425	265.9	280.875
	74	81.025	61.325	140.8	108.1	56.375	157.8	33.5	66.2	205.425	357.95	380.875	303.975	341.5	250.9	251.05	21.175	27.6	29.325	37.5	37.95	36.475	10.3	20.875	510.575	442.05	361.65	640.35	813.225	807.45	658.5	750.075	61.325	63.8	95.225	120.725	154.725	119.7	267.325	307.5	101.425	78.95	63.675	77.5	349.9	260.2	277.15
	75	71.4	54.95	120.85	92.975	49.125	135.725	30.35	60.575	199.2	354.85	373.375	301.175	341.8	245.075	245.65	22.025	29.25	26.525	35.175	37.8	38.05	11.225	20.8	576.525	475.7	406.75	728.825	953.875	873.425	755.575	812.225	52.625	53.575	81.425	100.1	150.625	116.85	261.55	302.775	90.75	69.6	53.875	66.525	345.1	253.075	268.45
	76	61.225	48.5	105.3	78.95	44.725	118.775	25.775	52.925	193.475	353.025	367.2	300.2	339.9	239.925	241.05	24.1	33.525	26.325	35.575	42.575	44.05	12.125	20.65	644.475	503	460.85	810.8	1113.58	951.475	859.125	891.5	45.325	45.8	69.75	84.6	146.8	117	255	300.7	78.85	62	44.05	55.3	335.65	248.125	260.775
	77	53.425	43.1	90.875	67.325	39.225	103.7	24.65	49.475	189.775	349.65	360.1	306.2	338.9	235	233.7	29.225	41.975	29.275	39.675	49.1	55.15	14.025	25.425	689.275	513.8	515.45	883	1280.55	1025.8	953.575	974.7	38.875	39.575	61.1	72.5	142.975	114.925	247.575	288.925	68.725	54.15	38.875	50.4	325.9	238.15	251.7
	78	46.875	37.2	77.95	57.525	33.7	93	22.975	45.775	183.25	345.425	349.85	289.9	330.375	229.025	228.7	37.65	52.425	34.65	46.85	60.025	68.475	17.725	31.05	708	506.9	560.25	938.175	1436.6	1087.67	1009.27	1035.4	34.625	34.7	52.65	62.7	138.675	112.4	241.625	283.35	59.05	48.425	35.775	45.075	314.05	226.775	240.475
	79	41.975	33.1	67.625	51.825	33.05	89.475	22.975	44.1	179.5	341.825	342.8	284.575	317.675	219.725	222.25	46.35	64.525	42.85	59.75	76.975	86.075	23.425	38.2	688.25	486.3	590.725	965.775	1555.1	1119.65	1027.95	1086.62	31.125	30.625	49.5	58.725	133.425	109.95	238.15	278.55	52.05	43	31.075	41.625	302.4	214.35	229.85
	80	37.25	29.2	62.85	46.325	30.875	88.45	23.65	43.9	175.975	340.125	336.375	289.175	312.05	215.75	216.525	56.3	76.75	53.425	74.825	92.075	102.6	31.7	48.15	641.025	445.725	595.8	954.025	1615.05	1112.88	1006.55	1106.47	27.725	28.1	44.275	54.9	129.575	107.925	235.9	272.875	47.125	39.125	30.55	40.125	294.825	205.875	225.275
	81	36.625	27.65	58.475	42.925	32.45	95.8	25.125	46.95	171.825	338.6	333.725	279.175	300.325	211.45	209.975	64.625	87.225	64.65	92.875	111.45	121.5	40.875	57.65	586.325	400.9	581.575	902.325	1604.7	1038.08	952.1	1086	26.125	26.925	45.9	57.225	126.7	106.225	231.125	270.45	44.25	36.725	28.55	40.45	287.925	200.925	219.625
	82	37.5	28.075	57.1	42.125	35.025	109.95	28.3	53.15	169.9	337.125	329.025	285.875	290.6	209.575	206.9	71.6	98.25	78.125	111	126.05	137.8	50.95	66.475	532.8	359.95	539.85	814.225	1524.42	900.825	855.825	1033.85	28.275	27.8	49.5	62.575	125.4	102.975	229.325	265.875	40	34.925	29.6	42.15	281.375	196.25	212.4
	83	42.1	30.525	61.225	44.025	41.175	133.825	32.675	61.225	169.275	337.4	329.65	272.15	283.95	207.3	203.075	76.725	105.325	86.825	128.65	135.55	150.625	56.525	75.15	490.05	331.075	475.05	743.6	1408.3	744.25	736.575	944.475	30.925	31.15	57	75	126.225	104.9	225.8	263.375	40.55	35.45	32.425	49.6	275.9	192.775	211.075
	84	52.05	35.2	68.45	48.125	49.575	167.85	37.5	71	170.925	341.75	326.2	286.125	278.025	204.8	201.275	78.45	106.675	88.6	128.5	137.225	154.25	62.875	79.45	447.125	311	407.025	668.25	1266.47	597.4	608.75	816.9	38.525	39.575	68.5	92.375	129.325	106.9	224.1	263.4	43.35	37.625	40.725	58.825	275.05	194.125	210.85
	85	67.4	46.425	82.55	57.625	61.9	209.175	47.575	89.925	173.65	341.675	326.15	267.35	273.95	204.6	202.85	77.9	103.8	97.225	140.125	132.6	150.375	64.725	79.35	415.75	296.55	350.175	581.75	1115.1	486.025	494.45	671.475	52.125	53.75	85.125	116.5	132.9	108.55	223.75	264.925	49.9	43.925	51.675	80.625	274.7	199.475	208.55
	86	87.75	58.825	100.95	74.675	76.475	259.75	56.2	109.35	176.55	337.575	326.35	291.05	269.175	208.375	203.95	74.8	97.775	95.3	135.725	124.65	141.975	62.325	76.55	391.35	283.375	306.125	519.8	978.75	411.55	401.95	536.325	68.375	71.7	106.225	149.125	137.575	111.325	223.675	264.45	59.95	52.3	68.2	106.2	279.55	202.45	210.05
	87	109.65	75.675	127.15	93.425	92.175	310.4	62.55	127.45	183.225	337.825	328.7	270.25	266.25	215.1	208.925	68.525	89.125	90.025	127.85	113.475	129.1	58.325	71.55	379.95	274.575	271.625	476.55	859.25	371.025	326.225	437.725	90.025	93.575	132.525	185.7	142.575	116.975	225.975	267.5	75.9	66.65	86.8	134.075	284	207.35	213.425
	88	133.525	95.025	159.2	117.1	109.475	358.575	71.2	145.925	188.2	334.35	330.625	293	265.4	214.775	214.675	63.3	81.875	82.2	116.175	101.4	118.225	53.875	66.875	370.775	265.25	251.15	436.05	759.875	348.725	273.1	382.45	113.975	114.525	158.025	221.75	147.375	119.4	229.825	269.45	95.225	83.425	109.8	161.525	291.9	216.825	219.625
	89	154.125	111.175	189.4	141.775	122.325	398.575	77.425	161.8	194.275	330.75	333.325	273.7	268.45	224.35	222.25	58.575	74.425	75.025	104.875	90.35	105.825	49.6	60	359.8	254.3	233.25	400.7	699.5	331.85	248.3	360.175	136.175	136.075	182.125	256.175	152.875	123.775	233.35	273.5	117.875	102.55	133.2	183.2	300	226.775	223.425
	90	166.3	122.275	218.975	169	132.4	425.225	81	173	199.05	326.85	335.15	281.875	272.325	234.875	229.325	51.5	65.825	68.075	92.125	80.5	93.725	44.375	54.25	348.35	249.875	221.875	370.3	654.475	316.8	241.175	350.4	150.825	150.95	203.85	284.325	158.425	127.1	237.4	276.75	139.7	123.2	155.375	201.6	309.175	231.25	231.35
	91	177.825	130.175	244.55	189.375	135.625	435.15	82.9	180.7	203.975	323.85	338.2	278.475	278.15	246.7	241.975	49.075	59.825	61.075	81.625	70.525	84.1	41.525	48.925	341.5	246.275	216.3	340.975	622.2	302.475	240.025	347.05	159.775	164.65	220.6	304.25	163.05	128.725	240.175	280.875	159.475	137.175	171.625	212.175	316.9	241.375	238.95
	92	181.375	134.6	263.2	202.95	134.8	425.525	81.575	182.8	206.55	318.275	338.225	279.925	283.85	255.65	251.2	43.425	53.3	53.35	71.6	61.55	74.025	38.25	44.7	337.825	242.05	215.825	312.125	605.575	290.25	242.275	341.4	163.975	168.175	226.5	311.9	167.3	129.35	243.5	285.1	175.6	146.6	178.5	216.575	323.45	252.675	242.075
	93	177.5	134.7	275.85	210.25	123.95	396.675	79.075	182.175	207.725	311.55	340.65	311.175	285.375	270.65	263	36.875	45.65	48.475	64.425	48.375	67.7	35.4	40.6	344.525	236.975	217.5	299.875	617.75	286.6	248.875	347.175	159.125	164.975	220.175	296.025	171.05	130.6	245.8	288.8	184.4	148	175.5	210.125	332.225	253.875	254.4
	94	176.75	132.85	275.25	208.975	123.6	372.325	74.575	173.575	207.6	308.875	342.35	291.625	285.525	280.275	267.225	36.125	43.75	42.625	58.375	50.525	60.375	31.525	36.5	355.275	236.025	221.45	313.6	656.225	293.3	258.025	354.375	155.975	157.975	216.95	284.775	171.575	129.275	246.95	291.1	188.05	146.675	168.55	196.925	337.25	255.2	257.8
	95	166.425	126.475	268.75	201	117.325	330.9	68.175	159.625	206	313.325	343.375	315.375	288.4	287.975	270.125	33.35	41.475	39.025	53.4	46.4	55.85	28.675	33.6	369.625	239.275	226.175	336.775	724.325	309.375	271.725	364.4	144.25	144.3	202.15	256.7	170.075	126.225	247.65	288.5	186.475	135.375	154.675	177.95	340.375	259.675	259.9
	96	152.225	117.5	254.825	184.2	107.825	286.625	60.8	144.7	203.5	308.625	344.35	299.475	288.075	297.025	273.55	31.675	39.975	35.075	47.95	44.2	53.75	26.575	32.675	386.425	246.325	231.825	369.225	822.725	328.6	296.125	382	129.375	128.3	183.075	224.075	166.05	123.275	245.2	287.45	176.45	127.4	140.9	160.625	341.075	257.35	261.05
	97	134.65	107.675	233.45	165.15	99.35	246.1	55.325	129.625	202.3	306.65	341.575	304.6	285.5	297.85	270.975	31.75	40.825	31.825	44.5	44	54.475	25.35	30.825	405.9	256.05	239.95	408.95	950.25	347.675	325.925	403.6	113.075	110.325	160.95	190.8	163.075	118.95	241.5	285.025	160.575	117.5	122.725	139.85	338.6	254.275	261.55
	98	115.6	93.675	208.775	141.225	88.35	208.525	50.375	115.65	197.425	308.125	340.65	305.775	286.15	295.3	269.125	33.825	44.225	32.225	43.325	45.175	59.9	25.15	31.2	416.4	263.15	250.55	446.35	1076.9	358.2	351.75	423.825	94.825	92.45	138.8	159.425	156.575	115.45	238	283.9	143.85	104.75	107.05	122.05	333.6	246.95	258.075
	99	102.375	82.525	181.575	121.175	79.525	177.275	45.425	101.7	193.7	314.175	338.55	297.375	285.1	306.15	264.25	41.95	53.6	32.15	45.325	50.375	72.1	26.9	34.825	411.85	264.15	263.4	473.475	1150.95	364.65	374.25	439.075	82.3	79.225	118.225	133.575	151.4	112.425	233.575	280.95	125.925	92.7	91.575	105.825	327.375	241.075	252.625
	100	87.925	70.925	156.85	102.65	72.125	154.075	41.025	89.975	188.8	319.15	339.55	304.65	281.775	294.825	258.225	50.875	63.1	35.15	50.9	59.95	89.175	29.625	39.65	397.175	260.075	276.825	472.75	1155.03	358.975	386.975	446.45	69.75	66.65	100.125	111.25	147.075	109.475	225.575	276.55	108.95	82.175	78.5	91.675	321.025	234.65	245.6
	101	76.2	62.05	134.8	87.275	63.9	136.4	39.125	80.125	186.625	320.75	344.775	291.675	279.175	284.5	251.25	62.15	76.925	41.675	59.25	71.875	111.95	33.625	47.625	373.125	247	284.9	453.975	1124.53	344.7	389.275	440.9	59.025	55.075	85.425	95.525	143.8	110.075	222.475	275.375	94.9	71.575	68.975	81.175	312.05	224.3	232.875
	102	67.1	54.05	114.775	74.825	57.325	124	35.925	73.525	187.95	330.875	348.25	292.975	269.125	284.4	244.65	73.925	91.8	49.8	71.225	85.275	129.6	39.725	54.9	342.025	227.35	285.475	416.675	1060.47	315.5	376.4	424.175	51.125	46.825	74.025	85	140.85	109.575	220	269.25	80.875	63.475	59.2	70.8	305.425	218.025	220.875
	103	60.25	48.425	99.175	62.175	51.75	117.45	35.5	71.35	186.375	341.325	352.325	278.975	260.975	273.275	238.7	86.025	107	60.05	87.05	99	150.075	48	65	301.8	202.825	275.2	352.5	955.85	279.35	349.775	401	46.05	41.4	66.7	77.5	135.35	109.025	214.025	264.2	68.65	55.275	52.675	65.925	299.45	211.3	210.375
	104	56.45	44.925	89.45	57.15	49.825	116.275	35.75	71.95	183.925	348.975	357.6	273.725	245.9	264.55	228.15	95.525	119.6	70.15	100.25	111.075	165.375	55.125	73.65	260.575	178.2	253.65	283.675	823.425	240.175	312.85	367.6	41.075	37.65	62.125	74.2	130.75	107.975	208.525	257.675	63.25	51.275	47.5	62.375	291.35	202.075	200.925
	105	55.875	43.675	84.125	54.3	51.275	122.55	37.75	77.675	184.2	350.675	359.375	262.6	240.875	259.175	219.25	101.3	127.675	79.125	114.9	119.85	175.35	60.725	80.275	222.675	158.9	220.425	226.9	685.65	208.95	261.7	329.15	39.075	37.8	61.95	73.7	125.775	106.975	201.35	251.05	58.5	47.5	45.1	62.45	284.35	200.8	188.175
	106	60.05	46.275	81.4	54.225	53.825	136.375	42.725	89.4	183.725	353.05	364	254.525	212.375	254.325	213.475	103.025	129.425	85.4	124.5	122.625	177.25	65.675	85.65	198	143.775	187.2	189.05	563.2	182.6	210.45	287.475	39.8	39.7	64.475	78.725	122.875	104.925	195.1	240.95	55.9	45.675	45.4	66.05	280.15	185.85	180.575
	107	68.25	51.575	84.1	55.95	60.175	159.1	51.325	103.2	183.575	350	364.675	250.95	208.575	245.575	208.85	100.9	126	88.625	129.575	119.8	170.3	67.475	86.625	183.45	133.975	161.425	167.675	469.875	164.025	174.6	247.925	43.425	46.1	72.025	89.075	122.55	105.25	186.65	232.375	54.425	45.975	50.55	75.2	276.475	182.275	172.575
	108	82.525	61.8	92.475	62.9	71.225	189.325	60.15	119.975	183.575	344.875	361.5	237.5	188.675	236.875	204.65	94.95	119.625	88.475	128.55	113.225	158.675	67.825	85.475	174.275	127.825	143.1	159.125	412.175	147.75	154.7	218.3	51.975	57.925	82.925	103.9	120.4	104.575	175.85	221.575	57.725	48.5	59.1	87.025	275.5	174.025	166.775
	109	101.125	76.125	105.575	72.975	84.125	228.1	71.35	146.875	182.35	334.375	354.925	246.075	184.025	230.25	201.325	87.6	111.1	87.275	122.55	104.325	144.825	64.425	82.2	166.025	121.925	131.5	155.525	375.475	137.15	141.775	195.4	64.3	74.9	97.85	125.65	120.225	105.35	166.925	212.225	64	54.05	73.625	104.05	274.725	172.675	162.8
	110	124.575	92.925	124.475	90.4	100.25	271.45	80.1	174.1	187.9	326.35	350.475	232.35	171.425	218	202.6	80.075	101.175	80.525	115.625	95	131.05	60.8	75.975	159.05	120.125	118.775	154.075	345.35	129.025	134.1	180.6	80.85	95.3	117.6	150.7	122.25	103.35	158.375	202.625	73.975	63.175	95.1	126.15	271.4	170.875	157.875
	111	148.025	112.525	148.375	114.475	117.625	320.4	87.8	200	189.575	317.125	344.2	234.925	163.825	220.2	204.025	72.8	92.15	74.075	107.425	86.675	118.175	57.225	70.55	151.325	117.25	117.975	156.075	321.3	123.125	131	172.3	101.075	118.2	139.375	182.425	126.85	103.275	153.775	192.4	90.05	76.075	121.15	151.775	277.275	165.625	157.15
	112	170.725	132.25	174.725	137.9	133	365.525	96.25	221.9	192.025	309.5	340.225	224.175	158.925	210.05	205.35	65.8	82.8	67.825	98.325	78.15	105.9	52.45	63.65	142.575	115.25	114.5	152.85	301.4	118	129.825	167	123.5	139.375	162.65	214.425	129.575	103.975	152.3	185.35	109.8	93.625	148.3	179.875	278.25	169.35	157.3
	113	189.925	148.75	202.55	162.05	150	403.3	101.55	238.05	189.15	296.875	334.75	220.9	157.675	211.8	207.25	60.2	75.325	60.425	89.4	70.25	95.525	48.55	59.35	139.375	114.35	113.15	148.1	290.2	116.675	130.025	165.05	143.4	157.975	184.7	245.4	131.425	104.675	151.6	180.475	131.575	115.65	179.15	211.45	281.6	168.15	159.9
	114	203.775	161.875	232.85	187.525	159.1	431.175	103.4	246.55	190.925	285.6	332.425	215.625	158.6	216.375	208.2	53.075	66.75	55.75	80.4	59.05	86.875	43.675	53.225	140.45	111.275	112.275	149.2	289.925	115.3	131.55	163.9	160.625	172.35	200.225	268.125	135.55	104.725	153.6	177.825	153.5	135.875	205.475	236.975	283.225	168.8	162.575
	115	211.475	166.775	260.325	205.125	170.325	454.725	101.825	248.325	190.95	276.075	329.8	213.175	162.45	211.8	215.65	48.525	61.1	50.175	72.3	55.75	79.075	40.025	48.55	144.45	115.55	115.025	152.65	302.75	118.325	134.4	164.95	173.775	182.7	218	294.85	135.325	103.425	153.975	177.1	169.575	149.1	223.35	251.525	283.875	168.125	164.7
	116	214.625	176.025	283.975	222.425	170.65	460.35	99.75	246.1	186.85	268.525	324.825	214.15	168.75	236.25	204.725	44.175	55.125	45.9	64.475	50.575	72.1	36.5	43.925	152.1	118.8	117.25	155.575	326.625	125.25	138.375	169.125	182.175	183.625	228.975	307.2	134.35	101.725	154.85	179.475	187.1	162.525	236.5	259.65	289.1	169.975	167.1
	117	210.125	179.575	298.475	229.6	168.15	449.6	94.95	238.725	185.15	263.225	320.65	211.3	173.65	212.3	202.95	40.475	50.175	41.05	59.25	45.6	66.625	33.85	41.075	160.9	123.575	121.4	165.65	356.7	134.125	145.525	174.025	184.1	179.35	231.775	309.225	132.375	100.325	154.65	180.3	200.05	169.075	239.325	258.475	289.95	169.275	169.175
	118	201.875	178.65	303.25	228.7	159.275	424.45	88.675	226.925	183.025	262.2	315.775	214.025	174.625	218.9	198.95	38.65	47.725	38.325	54.225	43.85	62.95	31.325	37.55	169.975	130.45	126.825	169.5	393.625	139.75	152.55	181.4	179.65	171.05	225.775	298.55	129.05	96.775	153.975	181.9	205.7	167.8	232.85	250.4	289.125	170.775	168.7
	119	189.075	166.825	300.4	220.65	150.85	391.8	81.65	210.6	178.35	251.525	309.075	212.575	178.475	215.65	190.25	38.45	46.025	35.075	50.325	42.225	63.8	29.275	36.225	177.875	135.45	133.375	174.925	434.675	150.375	162.025	192.25	170.275	156	212.825	280.2	127.1	92.95	154.375	182.95	204.025	163.575	219.55	235.575	284.925	172.1	168.375
	120	171.125	148.125	288.05	206.375	139.175	350.775	75.45	192.675	172.65	255.8	302.95	215.6	179.95	217.5	184.65	41.15	48.2	33.75	48.675	44.5	66.775	27.65	35.625	183.65	139.8	141.3	190.275	466.525	157.925	171.675	202.95	153.65	139.1	195.775	254.825	123.7	89.525	154.3	184.825	197.875	153.85	202.25	216.25	280.45	171.75	165.475
	121	153.6	130.8	266.65	186.025	126	305.2	67.725	172.15	170.925	258.225	296.975	215.8	179.425	218.6	178.95	46.925	53.275	34.125	50.7	45.925	75.75	26.125	38.2	187.15	143.675	147.325	197.75	485.55	163.4	178.15	211.925	134.75	121.375	175.675	226.05	122.65	87.825	153.775	184.15	184.325	141.275	178.55	196.275	274.65	172.6	162.775
	122	136.625	115.95	240.825	161.45	111.8	261.55	61.6	154.275	168.375	256.75	290.55	213.5	180.225	215.2	171.5	54.35	62.95	34.75	51.325	51.975	89.65	29.275	41.3	187.525	145.2	151.6	196.375	485.6	168.6	182.875	217.6	117.25	102.45	154.25	195.875	120.475	84.325	153.35	185.35	167.325	127.475	155.825	172.875	266.225	171.05	157.525
	123	116.95	100.85	212.925	138.925	98.05	223.725	55.275	136.025	160.325	252.025	286.55	211.225	178.925	219.375	168.5	64.025	73.8	39.575	57.325	60.625	106.85	32.675	48.35	180.95	141.45	153.55	194.65	470.2	167.3	183	217.55	98.375	85.975	133.575	168.55	117.8	80.8	148.625	181.175	149.275	113.025	131.275	151.2	256.15	166.85	150.35
	124	102.8	88.175	184.425	118.275	86.175	195.575	51.575	121.3	160.075	258.95	283.725	213.425	176.775	210.6	162.9	75.325	86.2	45.55	65.325	69.85	124.55	37.45	54.9	173.575	136.55	150.4	192.6	437.575	163.025	179.925	214.95	83.475	72.575	113.175	142.2	117.675	79.575	151.775	184.05	131.725	98.625	113.725	131.85	248.8	164.725	146.9
	125	90.7	77.5	158.9	99.775	75.525	171.5	47.75	110.9	156	256.6	281.2	211.675	171.6	208.5	161.675	85.8	98.175	50.775	74.875	79.4	142.1	44.125	62.7	163.725	129.8	146.875	183.125	394.925	151.675	173.275	209.075	70.9	62.425	97.825	122.225	117.125	80.55	150.225	181.2	114.1	85.55	98.45	114.375	239.65	162.025	141.125
	126	81.75	68.3	136.575	85.6	69	156.575	46.6	103.875	154.325	258.05	277.2	208	165.725	199.6	156.3	95.25	109.4	58.225	86.1	87.85	157.125	49.4	69.375	150.8	122.375	139.025	174.725	345.475	138.175	162.5	199.3	61.225	53.6	84.7	106.925	116.725	81.1	147.075	180.6	98.5	73.725	84.475	100.2	230.05	158.675	135.2
	127	73.55	63.725	119.825	74.875	64.15	147.925	45.45	101.95	154.7	258	273.275	202.4	160.825	196.575	153.25	100.025	116.025	65.075	97.8	94.425	167.2	54.45	76.05	136.175	114.9	129.675	162.85	301.525	128.575	150.7	186.9	55.325	48.775	76.275	96.675	117.25	83.125	145.925	177.975	86.475	65.75	75.275	90.8	223.025	153.9	128.2
	128	69.9	61.475	106.475	66.775	62.1	145.85	46.45	104.525	153.9	253.1	269.7	199.325	153.225	190.05	151.225	101.675	118.825	72.875	106.375	100.1	170.4	60.075	80.525	124.65	106.375	120.175	145.925	266.2	117.675	138.2	172.675	50.6	45.5	71.175	91.075	116.225	83.925	143.725	176.925	76.175	57.725	68.825	84.025	215.875	147.825	123.95
[truncated: 20 more columns]

## Sheet: SFig7_C_Period
All technical replicates:	Strain	Media	Period			Biological Replicates: two technical replicates per run averaged		Strain	Media	Period			Average of biological replicates:	Strain	Avg Period				Standard Deviation between biological replicates	Strain	St Dev
	WT	0g0a	22.4494					WT	0g0a	22.577			Calculated using R, _0_ is low nutrient media, _high_ is high nutrient media	WT_0_avg	22.5822				Calculated using R _0_ is low nutrient media, _high_ is high nutrient medai	WT_0_sd	0.283042
	WT	0g0a	22.7045					WT	05g	21.0339				WT_high_avg	21.2322					WT_high_sd	0.32758
	WT	05g	21.2553					set1	0g0a	23.7857				set1_0_avg	24.0399					set1_0_sd	0.215745
	WT	05g	20.8125					set1	05g	25				set1_high_avg	26.0587					set1_high_sd	2.13139
	set1	0g0a	23.7857					swd3	0g0a	24.0758				swd3_0_avg	24.1474					swd3_0_sd	0.10132
	set1	0g0a	23.7857					swd3	05g	24.9875				swd3_high_avg	24.9937					swd3_high_sd	0.00883883
	set1	05g	NA					WT	0g0a	22.4494				set1_swd3_0_avg	24.3677					set1_swd3_0_sd	0.210144
	set1	05g	28.9565					WT	05g	21.7174				set1_swd3_high_avg	24.3104					set1_swd3_high_sd	0.741957
	swd3	0g0a	24.3659					set1	0g0a	24.2191
	swd3	0g0a	23.7857					set1	05g	29.25
	swd3	05g	28.9565					set1swd3	0g0a	24.2191
	swd3	05g	24.975					set1swd3	05g	23.7857
	WT	0g0a	22.4494					WT	0g0a	22.3247
	WT	0g0a	22.4494					WT	05g	21.0339
	WT	05g	21.7174					set1	0g0a	24.2191
	WT	05g	21.7174					set1	05g	25.15
	set1	0g0a	24.3659					swd3	0g0a	24.2191
	set1	0g0a	24.0723					swd3	05g	25
	set1	05g	29.5					WT	0g0a	22.9777
	set1	05g	29					WT	05g	21.1434
	set1swd3	0g0a	24.3659					set1	0g0a	23.9359
	set1swd3	0g0a	24.0723					set1	05g	24.835
	set1swd3	05g	23.7857					set1swd3	0g0a	24.5163
	set1swd3	05g	NA					set1swd3	05g	24.835
	WT	0g0a	22.2
	WT	0g0a	22.4494
	WT	05g	21.2553
	WT	05g	20.8125
	set1	0g0a	24.3659
	set1	0g0a	24.0723
	set1	05g	28.9565
	set1	05g	25.2911
	swd3	0g0a	24.0723
	swd3	0g0a	24.3659
	swd3	05g	25.5
	swd3	05g	24.5
	WT	0g0a	23.5059
	WT	0g0a	22.4494
	WT	05g	21.2553
	WT	05g	21.0316
	set1	0g0a	23.5059
	set1	0g0a	24.3659
	set1	05g	25
	set1	05g	24.67
	set1swd3	0g0a	24.6667
	set1swd3	0g0a	24.3659
	set1swd3	05g	25
	set1swd3	05g	24.67
